# Supplementary material
Source: publisher site journal article supplement (https://www.spandidos-publications.com/4182/downloadSupplementary)
Supplement: Supplementary file 1 [file downloadSupplementary]

## Sheet: Sheet1
Table SI. Identification of miRNAs from infected and control groups.
miRNA	Sequence	Mouse_C937-02-S01_1_clean(norm)	Mouse_C937-02-S02_1_clean(norm)	Mouse_C937-02-S01_1_clean(reads)	Mouse_C937-02-S02_1_clean(reads)	fold(Mouse_C937-02-S01_1_clean/Mouse_C937-02-S02_1_clean)	pvalue(Mouse_C937-02-S01_1_clean/Mouse_C937-02-S02_1_clean)
mmu-let-7a-2-3p	CTGTACAGCCTCCTAGCTTTC	0.220799	0	3	0		0.0996771
mmu-let-7a-5p	TGAGGTAGTAGGTTGTATAGTT	11460.7	7357.39	155716	111606	1.55771	0
mmu-let-7b-3p	CTATACAACCTACTGCCTTCCC	26.4959	11.932	360	181	2.22057	1.67e-19
mmu-let-7b-5p	TGAGGTAGTAGGTTGTGTGGTT	3353.28	1735.55	45561	26327	1.93211	0
mmu-let-7c-1-3p	CTGTACAACCTTCTAGCTTTCC	1.472	1.18661	20	18	1.2405	0.505595
mmu-let-7c-2-3p	CTATACAATCTACTGTCTTTCC	173.548	112.86	2358	1712	1.53773	1.89e-42
mmu-let-7c-5p	TGAGGTAGTAGGTTGTATGGTT	11015.9	6418.91	149673	97370	1.71616	0
mmu-let-7d-3p	CTATACGACCTGCTGCCTTTCT	487.893	266.592	6629	4044	1.83011	1.78e-208
mmu-let-7d-5p	AGAGGTAGTAGGTTGCATAGTT	2191.58	1375.74	29777	20869	1.59301	0
mmu-let-7e-3p	CTATACGGCCTCCTAGCTTTCC	5.74079	5.01014	78	76	1.14583	0.396859
mmu-let-7e-5p	TGAGGTAGGAGGTTGTATAGTT	716.347	464.229	9733	7042	1.54309	7.96e-172
mmu-let-7f-1-3p	CTATACAATCTATTGCCTTCCC	28.6303	13.3823	389	203	2.13941	1.65e-19
mmu-let-7f-2-3p	CTATACAGTCTACTGTCTTTC	37.2415	30.3245	506	460	1.2281	0.00141181
mmu-let-7f-5p	TGAGGTAGTAGATTGTATAGTT	80672.2	63811.6	1096092	967974	1.26422	0
mmu-let-7g-3p	ACTGTACAGGCCACTGCCTTGC	2.42879	1.05477	33	16	2.30268	0.00492075
mmu-let-7i-3p	CTGCGCAAGCTACTGCCTTGCT	11.6288	10.6136	158	161	1.09565	0.41331
mmu-let-7i-5p	TGAGGTAGTAGTTTGTGCTGTT	92989.2	81602	1263443	1237841	1.13954	0
mmu-let-7j	TGAGGTATTAGTTTGTGCTGTTAT	13.248	11.7343	180	178	1.129	0.250306
mmu-let-7k	TGAGGTAGGAGGTTGTGTG	0.515199	0.0659229	7	1		0.0259322
mmu-miR-100-3p	ACAAGCTTGTGTCTATAGGTAT	0.0735998	0.0659229	1	1		0.917549
mmu-miR-100-5p	AACCCGTAGATCCGAACTTGTG	2685.22	1392.36	36484	21121	1.92854	0
mmu-miR-101a-3p	TACAGTACTGTGATAACTGAA	5163.39	5042.51	70155	76491	1.02397	5.86e-06
mmu-miR-101a-5p	TCAGTTATCACAGTGCTGATGC	0.588798	0.593306	8	9		0.998259
mmu-miR-101b-3p	GTACAGTACTGTGATAGCT	156.473	184.584	2126	2800	0.847707	8.4e-09
mmu-miR-101b-5p	TCGGTTATCATGGTACCGATGCT	0	0	0	0		0.944977
mmu-miR-101c	ACAGTACTGTGATAACTGA	0	0	0	0		0.944977
mmu-miR-103-1-5p	GGCTTCTTTACAGTGCTGCCTTG	0	0	0	0		0.944977
mmu-miR-103-2-5p	AGCTTCTTTACAGTGCTGCCTTG	0.441599	0.197769	6	3		0.2609
mmu-miR-103-3p	AGCAGCATTGTACAGGGCTATGA	3532.05	2757.62	47990	41831	1.28083	1.23e-300
mmu-miR-105	CCAAGTGCTCAGATGCTTGTGGT	0	0	0	0		0.944977
mmu-miR-106a-3p	ACTGCAGTGCCAGCACTTCTTAC	0.0735998	0.0659229	1	1		0.917549
mmu-miR-106a-5p	CAAAGTGCTAACAGTGCAGGTAG	38.1247	40.8063	518	619	0.934286	0.25439
mmu-miR-106b-3p	CCGCACTGTGGGTACTTGCTGC	1176.35	928.392	15983	14083	1.26708	1.8e-93
mmu-miR-106b-5p	TAAAGTGCTGACAGTGCAGAT	258.556	247.211	3513	3750	1.04589	0.0559804
mmu-miR-107-3p	AGCAGCATTGTACAGGGCTATCA	74.7774	34.0821	1016	517	2.19404	7.64e-51
mmu-miR-107-5p	AGCTTCTTTACAGTGTTGCCTTG	0.220799	0.0659229	3	1		0.31
mmu-miR-10a-3p	CAAATTCGTATCTAGGGGAATA	32.3103	35.5324	439	539	0.909319	0.139545
mmu-miR-10a-5p	TACCCTGTAGATCCGAATTTGTG	17017.9	16202.6	231222	245781	1.05032	2.25e-64
mmu-miR-10b-3p	CAGATTCGATTCTAGGGGAATA	0.588798	0.659229	8	10	0.893163	0.830373
mmu-miR-10b-5p	TACCCTGTAGAACCGAATTTGTG	887.908	488.62	12064	7412	1.81717	0
mmu-miR-1187	TATGTGTGTGTGTATGTGTGTAA	1.0304	1.4503	14	22	0.71047	0.326241
mmu-miR-1188-3p	TCCGAGGCTCCCCACCACACCCTGC	0	0	0	0		0.944977
mmu-miR-1188-5p	TGGTGTGAGGTTGGGCCAGGA	0	0	0	0		0.944977
mmu-miR-1190	TCAGCTGAGGTTCCCCTCTGTC	0.0735998	0.197769	1	3		0.447557
mmu-miR-1191a	CAGTCTTACTATGTAGCCCTA	37.0207	43.6409	503	662	0.848302	0.00532423
mmu-miR-1191b-3p	AGACTCACTATGTAGCCCAAGC	0	0	0	0		0.944977
mmu-miR-1191b-5p	TCAGGCTACAGAGCGAGAACCT	0.662398	0.197769	9	3		0.0597474
mmu-miR-1192	AAACAAACAAACAGACCAAATT	0	0	0	0		0.944977
mmu-miR-1193-3p	TAGGTCACCCGTTTTACTATC	0.662398	0.659229	9	10	1.00481	0.978786
mmu-miR-1193-5p	TGGTAGACCGGTGACGTACA	0	0.0659229	0	1		0.556537
mmu-miR-1194	GAATGAGTAACTGCTAGATCCT	0.0735998	0	1	0		0.446491
mmu-miR-1195	TGAGTTCGAGGCCAGCCTGCTCA	1.104	0.856997	15	13	1.28822	0.503181
mmu-miR-1197-3p	TAGGACACATGGTCTACTTCT	0	0	0	0		0.944977
mmu-miR-1197-5p	CGGTTGACCATGGTGTGTACG	0	0	0	0		0.944977
mmu-miR-1198-3p	AAGCTAGCCTCTAACTCATGGC	0.735998	0.593306	10	9	1.2405	0.636916
mmu-miR-1198-5p	TATGTGTTCCTGGCTGGCTTGG	299.404	275.755	4068	4183	1.08576	0.000187061
mmu-miR-1199-3p	TGCGGCCGGTGCTCAGTCGGC	0	0	0	0		0.944977
mmu-miR-1199-5p	TCTGAGTCCCGGTCGCGCGG	0.0735998	0	1	0		0.446491
mmu-miR-122-3p	AAACGCCATTATCACACTAA	0	0	0	0		0.944977
mmu-miR-122-5p	TGGAGTGTGACAATGGTGTTTG	1.6192	4.35091	22	66	0.372151	2.09e-05
mmu-miR-1224-3p	CCCCACCTCTTCTCTCCTCAG	0	0	0	0		0.944977
mmu-miR-1224-5p	GTGAGGACTGGGGAGGTGGAG	0	0	0	0		0.944977
mmu-miR-1231-3p	TGCCCTGTCTGTTCTGCCCACAG	0	0.131846	0	2		0.293579
mmu-miR-1231-5p	TCTGGGCAGAGCTGCAGGAGAGA	0.0735998	0.131846	1	2		0.709718
mmu-miR-124-3p	TAAGGCACGCGGTGAATGCC	0	0	0	0		0.944977
mmu-miR-124-5p	CGTGTTCACAGCGGACCTTGAT	0	0	0	0		0.944977
mmu-miR-1247-3p	CGGGAACGTCGAGACTGGAGC	0	0.131846	0	2		0.293579
mmu-miR-1247-5p	ACCCGTCCCGTTCGTCCCCGGA	0	0	0	0		0.944977
mmu-miR-1249-3p	ACGCCCTTCCCCCCCTTCTTCA	19.8719	11.2069	270	170	1.77319	2.94e-09
mmu-miR-1249-5p	AGGAGGGAGGGGATGGGCCAAGTTC	0.1472	0.131846	2	2		0.89704
mmu-miR-1251-3p	CGCTTTGCTCAGCCAGTGTAG	0	0	0	0		0.944977
mmu-miR-1251-5p	ACTCTAGCTGCCAAAGGCGCT	0	0	0	0		0.944977
mmu-miR-1258-3p	TTAGGGAATTAGCTCAGCAGTA	0	0.197769	0	3		0.154866
mmu-miR-1258-5p	TGCTGAGCTAATTCCCTAACTG	0.441599	0.131846	6	2		0.131258
mmu-miR-125a-3p	ACAGGTGAGGTTCTTGGGAGCC	5.00479	4.15314	68	63	1.20506	0.285139
mmu-miR-125a-5p	TCCCTGAGACCCTTTAACCTGTGA	949.511	300.608	12901	4560	3.15863	0
mmu-miR-125b-1-3p	ACGGGTTAGGCTCTTGGGAGCT	44.7487	37.1805	608	564	1.20355	0.00151821
mmu-miR-125b-2-3p	ACAAGTCAGGTTCTTGGGACCT	22.6687	10.8114	308	164	2.09675	3.74e-15
mmu-miR-125b-5p	TCCCTGAGACCCTAACTTGTGA	1852.95	886.135	25176	13442	2.09104	0
mmu-miR-1264-3p	CAAATCTTATTTGAGCACCTGT	0	0	0	0		0.944977
mmu-miR-1264-5p	AGGTCCTCAATAAGTATTTGTT	0	0	0	0		0.944977
mmu-miR-126a-3p	TCGTACCGTGAGTAATAATGCG	12186.4	7930.26	165577	120296	1.5367	0
mmu-miR-126a-5p	CATTATTACTTTTGGTACGCG	735.336	607.941	9991	9222	1.20955	1.12e-39
mmu-miR-126b-3p	CGCGTACCAAAAGTAATAATGTG	0.220799	0.263692	3	4		0.849858
mmu-miR-126b-5p	ATTATTACTCACGGTACGAGTT	0.441599	0.131846	6	2		0.131258
mmu-miR-127-3p	TCGGATCCGTCTGAGCTTGGCT	551.925	484.995	7499	7357	1.138	3.35e-15
mmu-miR-127-5p	CTGAAGCTCAGAGGGCTCTGAT	12.2176	11.998	166	182	1.0183	0.862945
mmu-miR-128-1-5p	CGGGGCCGTAGCACTGTCTGA	1.0304	0.856997	14	13	1.20233	0.629511
mmu-miR-128-2-5p	GGGGGCCGATGCACTGTAAGAGA	0.1472	0.131846	2	2		0.89704
mmu-miR-128-3p	TCACAGTGAACCGGTCTCTTT	433.944	263.889	5896	4003	1.64442	4.23e-133
mmu-miR-129-1-3p	AAGCCCTTACCCCAAAAAGTAT	0.662398	0.263692	9	4		0.121149
mmu-miR-129-2-3p	AAGCCCTTACCCCAAAAAGCAT	0.809598	0.395537	11	6	2.04683	0.156784
mmu-miR-129-5p	CTTTTTGCGGTCTGGGCTTGC	12.9536	6.9219	176	105	1.87139	2.33e-07
mmu-miR-1291	ATGGCTCTTACTGAAGACTAGCAGTT	5.66719	1.58215	77	24	3.58195	3.22e-09
mmu-miR-1298-3p	CATCTGGGCAACTGATTGAACT	0	0	0	0		0.944977
mmu-miR-1298-5p	TTCATTCGGCTGTCCAGATGTA	0	0.0659229	0	1		0.556537
mmu-miR-129b-3p	CAAGCCCAGACCGCAAAAAGATT	1.1776	1.31846	16	20	0.893163	0.748991
mmu-miR-129b-5p	GCTTTTTGGGGTAAGGGCTTCC	0.220799	0.395537	3	6		0.441441
mmu-miR-1306-3p	ACGTTGGCTCTGGTGGTGATG	5.22559	4.21906	71	64	1.23857	0.213737
mmu-miR-1306-5p	CACCACCTCCCCTGCAAACGTCC	10.2304	6.79006	139	103	1.50667	0.00151852
mmu-miR-130a-3p	CAGTGCAATGTTAAAAGGGCAT	84.787	58.2099	1152	883	1.45657	2.84e-17
mmu-miR-130a-5p	GCTCTTTTCACATTGTGCTACT	4.63679	2.63692	63	40	1.75841	0.00474283
mmu-miR-130b-3p	CAGTGCAATGATGAAAGGGCAT	36.3583	26.0395	494	395	1.39627	6.91e-07
mmu-miR-130b-5p	ACTCTTTCCCTGTTGCACTACT	123.942	104.224	1684	1581	1.18919	7.43e-07
mmu-miR-130c	CAGTGCAATGTTCCAAGGTGTG	0	0	0	0		0.944977
mmu-miR-132-3p	TAACAGTCTACAGCCATGGTCG	66.3134	69.6805	901	1057	0.951679	0.275282
mmu-miR-132-5p	AACCGTGGCTTTCGATTGTTAC	5.37279	8.50405	73	129	0.631791	0.00149852
mmu-miR-133a-3p	TTTGGTCCCCTTCAACCAGCTG	39.9647	28.1491	543	427	1.41975	5.27e-08
mmu-miR-133a-5p	GCTGGTAAAATGGAACCAAAT	0.735998	0.659229	10	10	1.11645	0.798446
mmu-miR-133b-3p	TTTGGTCCCCTTCAACCAGCTA	2.28159	1.97769	31	30	1.15367	0.573992
mmu-miR-133b-5p	GCTGGTCAAACGGAACCAAGTC	0	0	0	0		0.944977
mmu-miR-133c	TTTGGTCCCCTTCAAGGAGTCAG	0	0	0	0		0.944977
mmu-miR-134-3p	CTGTGGGCCACCTAGTCACC	0	0	0	0		0.944977
mmu-miR-134-5p	TGTGACTGGTTGACCAGAGGGG	12.6592	15.0963	172	229	0.838559	0.0809925
mmu-miR-135a-1-3p	TATAGGGATTGGAGCCGTGGCG	0.367999	0.395537	5	6		0.926681
mmu-miR-135a-2-3p	TGTAGGGATGGAAGCCATGAA	0.294399	0	4	0		0.0470963
mmu-miR-135a-5p	TATGGCTTTTTATTCCTATGTGA	3.97439	1.05477	54	16	3.76803	3.79e-07
mmu-miR-135b-3p	ATGTAGGGCTAAAAGCCATGGG	0	0	0	0		0.944977
mmu-miR-135b-5p	TATGGCTTTTCATTCCTATGTGA	0.1472	0.725152	2	11	0.202991	0.0223626
mmu-miR-136-3p	ATCATCGTCTCAAATGAGTCTT	21.7855	23.3367	296	354	0.933532	0.384068
mmu-miR-136-5p	ACTCCATTTGTTTTGATGATGG	7.13918	5.20791	97	79	1.37083	0.0369043
mmu-miR-137-3p	TTATTGCTTAAGAATACGCGTAG	0.0735998	0	1	0		0.446491
mmu-miR-137-5p	ACGGGTATTCTTGGGTGGATAAT	0	0	0	0		0.944977
mmu-miR-138-1-3p	CGGCTACTTCACAACACCAGGG	0.883198	0.0659229	12	1	13.3974	0.0009192
mmu-miR-138-2-3p	GCTATTTCACGACACCAGGGT	0.735998	0.46146	10	7	1.59493	0.346329
mmu-miR-138-5p	AGCTGGTGTTGTGAATCAGGCCG	30.2495	5.66937	411	86	5.33561	3.48e-60
mmu-miR-139-3p	TGGAGACGCGGCCCTGTTGGAG	32.6783	24.3255	444	369	1.34337	2.65e-05
mmu-miR-139-5p	TCTACAGTGCACGTGTCTCCAG	1185.62	1006.58	16109	15269	1.17787	1.26e-47
mmu-miR-140-3p	TACCACAGGGTAGAACCACGG	3609.04	4066.52	49036	61686	0.887501	5.98e-87
mmu-miR-140-5p	CAGTGGTTTTACCCTATGGTAG	360.713	218.468	4901	3314	1.6511	1.56e-112
mmu-miR-141-3p	TAACACTGTCTGGTAAAGATGG	15.1616	9.2292	206	140	1.64278	4.71e-06
mmu-miR-141-5p	CATCTTCCAGTGCAGTGTTGGA	1.84	1.64807	25	25	1.11645	0.692716
mmu-miR-142a-3p	TGTAGTGTTTCCTACTTTATGGA	6107.75	4846.12	82986	73512	1.26034	0
mmu-miR-142a-5p	CATAAAGTAGAAAGCACTACT	7398.33	5298.09	100521	80368	1.39641	0
mmu-miR-142b	TCCATAAAGTAGGAAACACT	0	0	0	0		0.944977
mmu-miR-143-3p	TGAGATGAAGCACTGTAGCTC	150034	101140	2038509	1534218	1.48343	0
mmu-miR-143-5p	GGTGCAGTGCTGCATCTCTGG	193.273	123.935	2626	1880	1.55947	9.55e-50
mmu-miR-144-3p	TACAGTATAGATGATGTACT	201.001	182.475	2731	2768	1.10153	0.000337289
mmu-miR-144-5p	GGATATCATCATATACTGTAAGT	422.316	276.019	5738	4187	1.53002	1.26e-98
mmu-miR-145a-3p	ATTCCTGGAAATACTGTTCTTG	961.14	467.459	13059	7091	2.05609	0
mmu-miR-145a-5p	GTCCAGTTTTCCCAGGAATCCCT	6845.44	2894.48	93009	43907	2.365	0
mmu-miR-145b	GTCCAGTTTTCCCAGGAGACT	0.588798	0.46146	8	7		0.636654
mmu-miR-146a-3p	CCTGTGAAATTCAGTTCTTCAG	0.809598	1.77992	11	27	0.454851	0.0241965
mmu-miR-146a-5p	TGAGAACTGAATTCCATGGGTT	15134.3	12016.2	205630	182277	1.25949	0
mmu-miR-146b-3p	GCCCTAGGGACTCAGTTCTGGT	19.7247	31.3134	268	475	0.629915	7.85e-10
mmu-miR-146b-5p	TGAGAACTGAATTCCATAGGCT	3575.92	4318.81	48586	65513	0.827988	7.35e-220
mmu-miR-147-3p	GTGTGCGGAAATGCTTCTGCTA	10.9664	43.6409	149	662	0.251286	2.51e-66
mmu-miR-147-5p	TGGAAACATTTCTGCACAAACTAG	7.13918	15.5578	97	236	0.458881	1.68e-11
mmu-miR-148a-3p	TCAGTGCACTACAGAACTTTGT	199814	213592	2714874	3240022	0.935497	0
mmu-miR-148a-5p	AAAGTTCTGAGACACTCCGACT	178.7	183.991	2428	2791	0.971246	0.29349
mmu-miR-148b-3p	TCAGTGCATCACAGAACTTTGT	4709.58	4833.79	63989	73325	0.974302	1.48e-06
mmu-miR-148b-5p	GAAGTTCTGTTATACACTCAGGCT	39.8911	37.3123	542	566	1.06911	0.265605
mmu-miR-149-3p	GAGGGAGGGACGGGGGCGGTGC	0	0.197769	0	3		0.154866
mmu-miR-149-5p	TCTGGCTCCGTGTCTTCACTCCC	117.024	88.6663	1590	1345	1.31982	6.03e-14
mmu-miR-150-3p	CTGGTACAGGCCTGGGGGATAG	67.123	27.6217	912	419	2.43008	2.87e-55
mmu-miR-150-5p	TCTCCCAACCCTTGTACCAGTG	9310.15	5444.83	126497	82594	1.70991	0
mmu-miR-151-3p	CTAGACTGAGGCTCCTTGAGG	1214.4	805.38	16500	12217	1.50786	6e-263
mmu-miR-151-5p	TCGAGGAGCTCACAGTCTAGT	62.339	44.5639	847	676	1.39887	6.42e-11
mmu-miR-152-3p	TCAGTGCATGACAGAACTTGG	1457.57	1141.06	19804	17309	1.27738	9.16e-123
mmu-miR-152-5p	TAGGTTCTGTGATACACTCCGACT	31.7951	22.0182	432	334	1.44404	4.03e-07
mmu-miR-153-3p	TTGCATAGTCACAAAAGTGATC	0.294399	0.0659229	4	1		0.171315
mmu-miR-153-5p	TTTGTGACGTTGCAGCT	0	0	0	0		0.944977
mmu-miR-154-3p	AATCATACACGGTTGACCTATT	0.294399	0.329614	4	5		0.892472
mmu-miR-154-5p	TAGGTTATCCGTGTTGCCTTCG	1.9136	1.12069	26	17	1.70752	0.0844688
mmu-miR-155-3p	CTCCTACCTGTTAGCATTAAC	4.41599	2.3073	60	35	1.91392	0.00191875
mmu-miR-155-5p	TTAATGCTAATTGTGATAGGGGT	1175.39	769.979	15970	11680	1.52652	2.62e-268
mmu-miR-15a-3p	CAGGCCATACTGTGCTGCCTCA	6.18238	5.01014	84	76	1.23397	0.183492
mmu-miR-15a-5p	TAGCAGCACATAATGGTTTGTG	75.5134	79.7008	1026	1209	0.947462	0.203942
mmu-miR-15b-3p	CGAATCATTATTTGCTGCTCTA	136.528	124.001	1855	1881	1.10102	0.00327211
mmu-miR-15b-5p	TAGCAGCACATCATGGTTTACA	887.098	582.956	12053	8843	1.52172	2.4e-200
mmu-miR-16-1-3p	CCAGTATTGACTGTGCTGCTGA	339.59	372.003	4614	5643	0.912868	4.26e-06
mmu-miR-16-2-3p	ACCAATATTATTGTGCTGCTTT	32.7519	32.1044	445	487	1.02017	0.759117
mmu-miR-16-5p	TAGCAGCACGTAAATATTGGCG	3124.02	2393.92	42446	36314	1.30498	1.05e-304
mmu-miR-1668	CAAAGGCCTCCTTCTCTGCAG	2.79679	1.71399	38	26	1.63174	0.0529295
mmu-miR-17-3p	ACTGCAGTGAGGGCACTTGTAG	43.2767	41.07	588	623	1.05373	0.361946
mmu-miR-17-5p	CAAAGTGCTTACAGTGCAGGTAG	1293.59	1088.98	17576	16519	1.18789	7.06e-57
mmu-miR-181a-1-3p	ACCATCGACCGTTGATTGTACC	122.617	95.0608	1666	1442	1.28988	1.35e-12
mmu-miR-181a-2-3p	ACCGACCGTTGACTGTACCTTG	0.515199	0.131846	7	2		0.0756975
mmu-miR-181a-5p	AACATTCAACGCTGTCGGTGAGT	1561.64	933.995	21218	14168	1.672	0
mmu-miR-181b-1-3p	CTCACTGAACAATGAATGC	1.472	1.71399	20	26	0.85881	0.619899
mmu-miR-181b-2-3p	CTCACTGATCAATGAATGCAAA	0	0.131846	0	2		0.293579
mmu-miR-181b-5p	AACATTCATTGCTGTCGGTGGGT	310.886	232.642	4224	3529	1.33633	3.3e-37
mmu-miR-181c-3p	ACCATCGACCGTTGAGTGGACC	31.1327	22.0182	423	334	1.41395	2.02e-06
mmu-miR-181c-5p	AACATTCAACCTGTCGGTGAGT	17.0752	10.284	232	156	1.66037	7.45e-07
mmu-miR-181d-3p	CCCACCGGGGGATGAATGTCA	0.0735998	0.131846	1	2		0.709718
mmu-miR-181d-5p	AACATTCATTGTTGTCGGTGGGT	237.139	143.25	3222	2173	1.65541	2.67e-75
mmu-miR-182-3p	GTGGTTCTAGACTTGCCAACT	0	0.131846	0	2		0.293579
mmu-miR-182-5p	TTTGGCAATGGTAGAACTCACACCG	231.471	97.8955	3145	1485	2.36448	3.67e-177
mmu-miR-183-3p	GTGAATTACCGAAGGGCCATAA	0.220799	0.197769	3	3		0.880001
mmu-miR-183-5p	TATGGCACTGGTAGAATTCACT	91.9262	39.29	1249	596	2.33968	3.62e-70
mmu-miR-1839-3p	AGACCTACTTATCTACCAACAGC	27.9679	16.6785	380	253	1.67689	1.16e-10
mmu-miR-1839-5p	AAGGTAGATAGAACAGGTCTTG	1184.37	1010.8	16092	15333	1.17172	8.4e-45
mmu-miR-184-3p	TGGACGGAGAACTGATAAGGGT	42.3935	29.6653	576	450	1.42906	1.2e-08
mmu-miR-184-5p	CCTTATCACTTTTCCAGCCAGC	0	0	0	0		0.944977
mmu-miR-1843a-3p	TCTGATCGTTCACCTCCATACA	18.9152	11.3387	257	172	1.66819	1.51e-07
mmu-miR-1843a-5p	TATGGAGGTCTCTGTCTGACT	178.995	132.505	2432	2010	1.35085	1.45e-23
mmu-miR-1843b-3p	CCGATCGTTCCCCTCCATAC	33.7823	28.0172	459	425	1.20577	0.00540929
mmu-miR-1843b-5p	ATGGAGGTCTCTGTCTGACTT	319.202	213.986	4337	3246	1.4917	2.35e-67
mmu-miR-185-3p	AGGGGCTGGCTTTCCTCTGGT	14.6464	8.6359	199	131	1.69599	2.03e-06
mmu-miR-185-5p	TGGAGAGAAAGGCAGTTCCTGA	727.093	486.049	9879	7373	1.49592	7.17e-153
mmu-miR-186-3p	GCCCTAAGGTGAATTTTTTGGG	0.441599	0.263692	6	4		0.431868
mmu-miR-186-5p	CAAAGAATTCTCCTTTTGGGCT	577.685	437.135	7849	6631	1.32153	5.42e-63
mmu-miR-187-3p	TCGTGTCTTGTGTTGCAGCCGG	64.9886	32.3681	883	491	2.0078	8.1e-37
mmu-miR-187-5p	AGGCTACAACACAGGACCCGGG	1.5456	0.988843	21	15	1.56303	0.18584
mmu-miR-188-3p	CTCCCACATGCAGGGTTTGCA	0	0	0	0		0.944977
mmu-miR-188-5p	CATCCCTTGCATGGTGGAGGG	2.28159	2.3073	31	35	0.988859	0.971242
mmu-miR-1892	ATTTGGGGACGGGAGGGAGGAT	0	0	0	0		0.944977
mmu-miR-1893	GGCGCGGGCGCTGGACGCCTCG	0	0	0	0		0.944977
mmu-miR-1894-3p	GCAAGGGAGAGGGTGAAGGGAG	0	0	0	0		0.944977
mmu-miR-1894-5p	CTCTCCCCTACCACCTGCCTCT	0	0	0	0		0.944977
mmu-miR-1895	CCCCCGAGGAGGACGAGGAGGA	0	0	0	0		0.944977
mmu-miR-1896	CTCTCTGATGGTGGGTGAGGAG	0	0	0	0		0.944977
mmu-miR-1897-3p	TCAACTCGTTCTGTCCGGTGAG	0	0	0	0		0.944977
mmu-miR-1897-5p	CTTTGGATGGAGAAAGAGGGGG	0	0	0	0		0.944977
mmu-miR-1898	AGGTCAAGGTTCACAGGGGATC	0	0	0	0		0.944977
mmu-miR-1899	AGCGATGGCCGAATCTGCTTCC	0	0	0	0		0.944977
mmu-miR-18a-3p	ACTGCCCTAAGTGCTCCTTCTG	10.672	12.7231	145	193	0.838786	0.109929
mmu-miR-18a-5p	TAAGGTGCATCTAGTGCAGATAG	53.9487	55.573	733	843	0.970771	0.558206
mmu-miR-18b-3p	TACTGCCCTAAATGCCCCTTCT	0.367999	0.395537	5	6		0.926681
mmu-miR-18b-5p	TAAGGTGCATCTAGTGCTGTTAG	7.94878	9.82251	108	149	0.809241	0.0940659
mmu-miR-1900	GGCCGCCCTCTCTGGTCCTTCA	0	0	0	0		0.944977
mmu-miR-1901	CCGCTCGTACTCCCGGGGGTCC	0	0	0	0		0.944977
mmu-miR-1902	AGAGGTGCAGTAGGCATGACTT	0	0.0659229	0	1		0.556537
mmu-miR-1903	CCTTCTTCTTCTTCCTGAGACA	0	0	0	0		0.944977
mmu-miR-1904	GTTCTGCTCCTCTGGAGGGAGG	0	0	0	0		0.944977
mmu-miR-1905	CACCAGTCCCACCACGCGGTAG	0	0	0	0		0.944977
mmu-miR-1906	TGCAGCAGCCTGAGGCAGGGCT	0	0	0	0		0.944977
mmu-miR-1907	GAGCAGCAGAGGATCTGGAGGT	0	0	0	0		0.944977
mmu-miR-190a-3p	ACTATATATCAAGCATATTCCT	0	0	0	0		0.944977
mmu-miR-190a-5p	TGATATGTTTGATATATTAGGT	0.294399	0.725152	4	11	0.405983	0.121185
mmu-miR-190b-3p	ACTGAATGTCAAGCATACTCTCA	0.294399	0.46146	4	7		0.502711
mmu-miR-190b-5p	TGATATGTTTGATATTGGGTT	2.87039	2.63692	39	40	1.08854	0.702214
mmu-miR-191-3p	GCTGCACTTGGATTTCGTTCCC	10.0096	9.75659	136	148	1.02593	0.826353
mmu-miR-191-5p	CAACGGAATCCCAAAAGCAGCTG	9435.27	5823.82	128197	88343	1.62012	0
mmu-miR-1912-3p	CACAGAACATGCAGTGAGAACT	0	0	0	0		0.944977
mmu-miR-1912-5p	TGCTCATTGCATGGGCTGTGTA	0	0	0	0		0.944977
mmu-miR-192-3p	CTGCCAATTCCATAGGTCACAG	0.1472	0.329614	2	5		0.367298
mmu-miR-192-5p	CTGACCTATGAATTGACAGCC	750.056	816.916	10191	12392	0.918155	1.63e-10
mmu-miR-1927	GACCTCTGGATGTTAGGGACTGA	1.472	1.05477	20	16	1.39557	0.320343
mmu-miR-1928	AGCTACATTGCCAGCTC	0	0	0	0		0.944977
mmu-miR-1929-3p	CAGCTCATGGAGACCTAGGTGG	0	0	0	0		0.944977
mmu-miR-1929-5p	TTCTAGGACTTTATAGAGCAGAG	2.50239	2.24138	34	34	1.11645	0.64619
mmu-miR-1930-3p	GGTGCAGTTACTGTGGCTGTGG	0	0.131846	0	2		0.293579
mmu-miR-1930-5p	ACCTCCATAGTACCTGCAGCGT	1.3984	1.71399	19	26	0.81587	0.510769
mmu-miR-1931	ATGCAAGGGCTGGTGCGATGGC	0	0	0	0		0.944977
mmu-miR-1932	GTTGCGGACAGCGCTAGGTCGG	0.441599	0.92292	6	14	0.47848	0.131421
mmu-miR-1933-3p	CCAGGACCATCAGTGTGACTAT	1.3984	2.37322	19	36	0.589239	0.0606395
mmu-miR-1933-5p	AGTCATGGTGTTCGGTCTTAGTTT	0	0	0	0		0.944977
mmu-miR-1934-3p	AGGATGACGGTGGGGCTGGTGA	0.367999	0.527383	5	8		0.554644
mmu-miR-1934-5p	TCTGGTCCCCTGCTTCGTCCTCT	3.38559	3.69168	46	56	0.917087	0.670268
mmu-miR-1936	TAACTGACCTGCTGTGAACTGGC	1.3984	2.3073	19	35	0.606075	0.077908
mmu-miR-1938	CGGTGGGACTTGTAGTTCGGTC	0.294399	0.791075	4	12	0.372151	0.0813888
mmu-miR-193a-3p	AACTGGCCTACAAAGTCCCAGT	0.220799	0.46146	3	7		0.305485
mmu-miR-193a-5p	TGGGTCTTTGCGGGCAAGATGA	1.104	0.46146	15	7	2.3924	0.0519263
mmu-miR-193b-3p	AACTGGCCCACAAAGTCCCGCT	6.62398	4.41683	90	67	1.49971	0.0115849
mmu-miR-193b-5p	CGGGGTTTTGAGGGCGAGATGA	0.0735998	0.131846	1	2		0.709718
mmu-miR-194-1-3p	CCAGTGGAGCTGCTGTTACTTC	0	0.0659229	0	1		0.556537
mmu-miR-194-2-3p	CCAGTGGGGCTGCTGTTATCTG	3.31199	4.48276	45	68	0.738829	0.115652
mmu-miR-194-5p	TGTAACAGCAACTCCATGTGGA	237.286	189.001	3224	2867	1.25547	7.11e-19
mmu-miR-1941-3p	CATCTTAGCAGTATCTCCCAT	2.57599	0.92292	35	14	2.79113	0.000680537
mmu-miR-1941-5p	AGGGAGATGCTGGTACAGAGGCTT	1.104	0.329614	15	5	3.34936	0.0135793
mmu-miR-1942	TCAGATGTCTTCATCTGGTTG	0	0	0	0		0.944977
mmu-miR-1943-3p	CAGGTGCCAGCTCCTCCCTTC	0.809598	0.92292	11	14	0.877213	0.761146
mmu-miR-1943-5p	AAGGGAGGATCTGGGCACCTGGA	7.65438	6.52636	104	99	1.17284	0.255356
mmu-miR-1945	TCTTCGCGGGTACTGTCGGGAC	1.1776	1.4503	16	22	0.811966	0.538312
mmu-miR-1946a	AGCCGGGCAGTGGTGGCACACACTTTT	0	0	0	0		0.944977
mmu-miR-1946b	GCCGGGCAGTGGTGGCACATGCTTTT	0	0	0	0		0.944977
mmu-miR-1947-3p	GCACTGAGCTAGCTCTCCCTCC	0.0735998	0	1	0		0.446491
mmu-miR-1947-5p	AGGACGAGCTAGCTGAGTGCTG	6.84478	12.3276	93	187	0.555241	2.07e-06
mmu-miR-1948-3p	TTTAGGCAGAGCACTCGTACAG	0.220799	0.263692	3	4		0.849858
mmu-miR-1948-5p	ATATGAGTATTCTGCCTAAAT	0.294399	1.58215	4	24	0.186076	0.000321648
mmu-miR-1949	CTATACCAGGATGTCAGCATAGTT	2.28159	1.84584	31	28	1.23607	0.414989
mmu-miR-1950	TCTGCATCTAAGGATATGGTCA	0.1472	1.05477	2	16	0.139557	0.00163811
mmu-miR-1951	GTAGTGGAGACTGGTGTGGCTA	0	0	0	0		0.944977
mmu-miR-1952	TCTCCACCCTCCTTCTG	0	0	0	0		0.944977
mmu-miR-1953	TGGGAAAGTTCTCAGGCTTCTG	0.0735998	0.527383	1	8		0.0332257
mmu-miR-1954	ACTGCAGAGTGAGACCCTGTT	0.441599	0.131846	6	2		0.131258
mmu-miR-1955-3p	GAGCATTGCATGCTGGGACAT	0.294399	0.395537	4	6		0.679365
mmu-miR-1955-5p	AGTCCCAGGATGCACTGCAGCTTTT	1.6192	0.988843	22	15	1.63746	0.139621
mmu-miR-1956	AGTCCAGGGCTGAGTCAGCGGA	0.1472	0.527383	2	8		0.0967752
mmu-miR-1957a	CAGTGGTAGAGCATATGAC	0	0.0659229	0	1		0.556537
mmu-miR-1957b	TGGAATGTAACTCAGTGGTAT	0	0	0	0		0.944977
mmu-miR-1958	TAGGAAAGTGGAAGCAGTAAGT	1.104	0.988843	15	15	1.11645	0.757269
mmu-miR-195a-3p	CCAATATTGGCTGTGCTGCTCC	84.787	50.431	1152	765	1.68125	1.79e-29
mmu-miR-195a-5p	TAGCAGCACAGAAATATTGGC	311.842	148.392	4237	2251	2.10147	3.38e-188
mmu-miR-195b	TAGCAGCACAGAAATAGTAGAA	0	0	0	0		0.944977
mmu-miR-1960	CCAGTGCTGTTAGAAGAGGGCT	1.104	1.97769	15	30	0.558227	0.0634235
mmu-miR-1961	TGAGGTAGTAGTTAGAA	0	0	0	0		0.944977
mmu-miR-1962	AGAGGCTGGCACTGGGACACAT	0	0	0	0		0.944977
mmu-miR-1963	TGGGACGAGATCATGAGGCCTTC	0	0	0	0		0.944977
mmu-miR-1964-3p	CCGACTTCTGGGCTCCGGCTTT	101.789	112.135	1383	1701	0.907734	0.00745665
mmu-miR-1964-5p	AGCTGGAGCACAAAAGCCGGTG	0	0.0659229	0	1		0.556537
mmu-miR-1966-3p	TTTCTGACTCAACTCTCCCTTAG	0.662398	0.395537	9	6		0.331442
mmu-miR-1966-5p	AAGGGAGCTGGCTCAGGAGAGAGTC	0	0	0	0		0.944977
mmu-miR-1967	TGAGGATCCTGGGGAGAAGATGC	0	0	0	0		0.944977
mmu-miR-1968-3p	ACCACCTCTGCAGCTGTTAAG	0	0	0	0		0.944977
mmu-miR-1968-5p	TGCAGCTGTTAAGGATGGTGGACT	3.75359	3.29614	51	50	1.13878	0.511539
mmu-miR-1969	AAGATGGAGACTTTAACATGGGT	0	0	0	0		0.944977
mmu-miR-196a-1-3p	CAACGACATCAAACCACCTGAT	2.94399	1.18661	40	18	2.48101	0.000915627
mmu-miR-196a-2-3p	TCGGCAACAAGAAACTGCCTGA	0	0	0	0		0.944977
mmu-miR-196a-5p	TAGGTAGTTTCATGTTGTTGGG	7.87518	5.40568	107	82	1.45684	0.0100272
mmu-miR-196b-3p	TCGACAGCACGACACTGCCTTC	0	0	0	0		0.944977
mmu-miR-196b-5p	TAGGTAGTTTCCTGTTGTTGGG	20.0927	19.7769	273	300	1.01597	0.847509
mmu-miR-1970	TGTGTCACTGGGGATAGGCTTTG	0.735998	0.263692	10	4	2.79113	0.0758029
mmu-miR-1971	GTAAAGGCTGGGCTGAGA	0	0	0	0		0.944977
mmu-miR-1981-3p	CATCTAACCCTGGCCTTTGAC	11.8496	11.0091	161	167	1.07634	0.503679
mmu-miR-1981-5p	GTAAAGGCTGGGCTTAGACGTGGC	240.009	209.635	3261	3180	1.14489	5.66e-08
mmu-miR-1982-3p	TCTCACCCTATGTTCTCCCACAG	1.7664	1.12069	24	17	1.57617	0.150192
mmu-miR-1982-5p	TTGGGAGGGTCCTGGGGAGG	0	0	0	0		0.944977
mmu-miR-1983	CTCACCTGGAGCATGTTTTCT	22.5215	26.501	306	402	0.849838	0.0318001
mmu-miR-199a-5p	CCCAGTGTTCAGACTACCTGTTC	2293.74	1893.83	31165	28728	1.21116	1.84e-121
mmu-miR-199b-3p	ACAGTAGTCTGCACATTGGTTA	4269.16	3459.17	58005	52473	1.23416	1.3e-267
mmu-miR-199b-5p	CCCAGTGTTTAGACTACCTGTTC	124.384	90.1166	1690	1367	1.38025	6.1e-19
mmu-miR-19a-3p	TGTGCAAATCTATGCAAAACTGA	230.883	166.587	3137	2527	1.38596	1.58e-34
mmu-miR-19a-5p	TAGTTTTGCATAGTTGCACTAC	0.1472	0.263692	2	4		0.548258
mmu-miR-19b-1-5p	AGTTTTGCAGGTTTGCATCCAGC	1.472	1.4503	20	22	1.01496	0.953266
mmu-miR-19b-2-5p	AGTTTTGCAGATTTGCAGTTCAGC	0	0	0	0		0.944977
mmu-miR-19b-3p	TGTGCAAATCCATGCAAAACTGA	548.687	459.482	7455	6970	1.19414	1.7e-26
mmu-miR-1a-1-5p	ACATACTTCTTTATATGCCCATA	0	0	0	0		0.944977
mmu-miR-1a-2-5p	ACATACTTCTTTATGTACCCATA	0	0	0	0		0.944977
mmu-miR-1a-3p	TGGAATGTAAAGAAGTATGTAT	920.807	724.822	12511	10995	1.27039	4.48e-75
mmu-miR-1b-3p	TGGGTACATAAAGAAGTATGTGC	0.294399	0.0659229	4	1		0.171315
mmu-miR-1b-5p	TACATACTTCTTTACATTCCA	0.367999	0.527383	5	8		0.554644
mmu-miR-200a-3p	TAACACTGTCTGGTAACGATGT	200.044	136.988	2718	2078	1.46031	5.23e-39
mmu-miR-200a-5p	CATCTTACCGGACAGTGCTGGA	14.352	5.73529	195	87	2.5024	1.19e-13
mmu-miR-200b-3p	TAATACTGCCTGGTAATGATGA	218.739	118.595	2972	1799	1.84441	1.33e-96
mmu-miR-200b-5p	CATCTTACTGGGCAGCATTGGA	1.0304	0.329614	14	5	3.12607	0.0223036
mmu-miR-200c-3p	TAATACTGCCGGGTAATGATGGA	165.379	92.6216	2247	1405	1.78553	3.91e-67
mmu-miR-200c-5p	CGTCTTACCCAGCAGTGTTTGG	0.294399	0	4	0		0.0470963
mmu-miR-201-3p	TGAACAGTGCCTTTCTGTGTAGG	0.1472	0	2	0		0.210962
mmu-miR-201-5p	TACTCAGTAAGGCATTGTTCTT	1.98719	0.659229	27	10	3.01442	0.00170542
mmu-miR-202-3p	AGAGGTATAGCGCATGGGAAGA	0	0	0	0		0.944977
mmu-miR-202-5p	TTCCTATGCATATACTTCTTT	6.40318	5.14198	87	78	1.24527	0.15887
mmu-miR-203-3p	GTGAAATGTTTAGGACCACTAG	341.209	394.746	4636	5988	0.864375	8.08e-14
mmu-miR-203-5p	AGTGGTTCTTGACAGTTCAACA	0	0.0659229	0	1		0.556537
mmu-miR-204-3p	GCTGGGAAGGCAAAGGGACGT	0.294399	0.131846	4	2		0.367896
mmu-miR-204-5p	TTCCCTTTGTCATCCTATGCCT	43.4239	18.5243	590	281	2.34415	3.54e-34
mmu-miR-205-3p	GATTTCAGTGGAGTGAAGCTCA	0	0	0	0		0.944977
mmu-miR-205-5p	TCCTTCATTCCACCGGAGTCTG	24.6559	25.644	335	389	0.96147	0.600118
mmu-miR-206-3p	TGGAATGTAAGGAAGTGTGTGG	173.769	158.083	2361	2398	1.09923	0.00110311
mmu-miR-206-5p	ACATGCTTCTTTATATCCTCATA	0	0	0	0		0.944977
mmu-miR-207	GCTTCTCCTGGCTCTCCTCCCTC	0	0	0	0		0.944977
mmu-miR-208a-3p	ATAAGACGAGCAAAAAGCTTGT	0	0	0	0		0.944977
mmu-miR-208a-5p	GAGCTTTTGGCCCGGGTTATAC	0	0	0	0		0.944977
mmu-miR-208b-3p	ATAAGACGAACAAAAGGTTTGT	0.0735998	0.0659229	1	1		0.917549
mmu-miR-208b-5p	AAGCTTTTTGCTCGCGTTATGT	0	0	0	0		0.944977
mmu-miR-20a-3p	ACTGCATTACGAGCACTTAAAG	3.09119	1.64807	42	25	1.87564	0.0116096
mmu-miR-20a-5p	TAAAGTGCTTATAGTGCAGGTAG	2304.04	2266.3	31305	34378	1.01666	0.0344874
mmu-miR-20b-3p	ACTGCAGTGTGAGCACTTCTAG	0.220799	0.329614	3	5		0.621853
mmu-miR-20b-5p	CAAAGTGCTCATAGTGCAGGTAG	117.392	103.301	1595	1567	1.1364	0.000324315
mmu-miR-210-3p	CTGTGCGTGTGACAGCGGCTGA	36.7999	60.715	500	921	0.606109	3.95e-20
mmu-miR-210-5p	AGCCACTGCCCACCGCACACTG	0.662398	3.1643	9	48	0.209335	7.61e-07
mmu-miR-211-3p	GCAAGGACAGCAAAGGGGGGC	0	0	0	0		0.944977
mmu-miR-211-5p	TTCCCTTTGTCATCCTTTGCCT	9.78877	2.17545	133	33	4.49964	3.53e-18
mmu-miR-212-3p	TAACAGTCTCCAGTCACGGCCA	3.75359	7.05375	51	107	0.532141	0.000144761
mmu-miR-212-5p	ACCTTGGCTCTAGACTGCTTACT	5.74079	7.91075	78	120	0.725695	0.0268854
mmu-miR-2136	CTGGGTGTTGACTGAGATGTG	0	0	0	0		0.944977
mmu-miR-2137	GCCGGCGGGAGCCCCAGGGAG	0.0735998	0.0659229	1	1		0.917549
mmu-miR-2139	AGCTGCGCTGCTCCTGGTAACTGC	0	0	0	0		0.944977
mmu-miR-214-3p	ACAGCAGGCACAGACAGGCAGT	230.294	213.92	3129	3245	1.07654	0.00324657
mmu-miR-214-5p	TGCCTGTCTACACTTGCTGTGC	51.1519	40.2789	695	611	1.26994	1.59e-05
mmu-miR-215-3p	TCTGTCATTCTGTAGGCCAAT	0.367999	0.197769	5	3		0.405638
mmu-miR-215-5p	ATGACCTATGATTTGACAGAC	4.19519	5.86714	57	89	0.715032	0.047371
mmu-miR-216a-3p	CACAGTGGTCTCTGGGATTATG	5.37279	0	73	0	49	1.61e-24
mmu-miR-216a-5p	TAATCTCAGCTGGCAACTGTGA	17.3696	0.0659229	236	1	263.483	1.71e-75
mmu-miR-216b-3p	ACACTTACCTGTAGAGATTCTT	16.8544	0	229	0	49	2.58e-75
mmu-miR-216b-5p	AAATCTCTGCAGGCAAATGTGA	30.3967	0.197769	413	3	153.698	5.59e-129
mmu-miR-216c-3p	TTTGCCTGCAGAGATTTCCCAGT	0	0	0	0		0.944977
mmu-miR-216c-5p	GAAGAATCTCTACAGGTAAGTGT	0	0	0	0		0.944977
mmu-miR-217-3p	CATCAGTTCCTAATGCATTGCCT	0.735998	0	10	0	49	0.000524004
mmu-miR-217-5p	TACTGCATCAGGAACTGACTGGA	245.087	0.46146	3330	7	531.113	0
mmu-miR-218-1-3p	AAACATGGTTCCGTCAAGCACC	0	0	0	0		0.944977
mmu-miR-218-2-3p	CATGGTTCTGTCAAGCACCGCG	0	0	0	0		0.944977
mmu-miR-218-5p	TTGTGCTTGATCTAACCATGT	106.941	86.9523	1453	1319	1.22988	5.18e-08
mmu-miR-2183	TTGAACCCCTGACCTCCT	0	0	0	0		0.944977
mmu-miR-219a-1-3p	AGAGTTGCGTCTGGACGTCCCG	7.43358	10.5477	101	160	0.704761	0.00556896
mmu-miR-219a-2-3p	AGAATTGTGGCTGGACATCTGT	0	0	0	0		0.944977
mmu-miR-219a-5p	TGATTGTCCAAACGCAATTCT	0.735998	0.46146	10	7	1.59493	0.346329
mmu-miR-219b-3p	AGAATTGCGTTTGGACAATCAGT	0	0	0	0		0.944977
mmu-miR-219b-5p	AGATGTCCAGCCACAATTCTCG	0.0735998	0.0659229	1	1		0.917549
mmu-miR-219c-3p	CGAGAATTGCGTTTGGACAATC	0.0735998	0	1	0		0.446491
mmu-miR-219c-5p	GGACGTCCAGACGCAACTCTCG	0.220799	0	3	0		0.0996771
mmu-miR-21a-3p	CAACAGCAGTCGATGGGCTGTC	10.672	37.1805	145	564	0.287031	8.95e-50
mmu-miR-21a-5p	TAGCTTATCAGACTGATGTTGA	98552.2	249978	1339028	3791983	0.394243	0
mmu-miR-21b	TAGTTTATCAGACTGATATTTCC	0.0735998	0.0659229	1	1		0.917549
mmu-miR-21c	TAGCTTATCAGACTGGTACAA	0.515199	1.05477	7	16	0.488448	0.113218
mmu-miR-22-3p	AAGCTGCCAGTTGAAGAACTGT	701.038	528.108	9525	8011	1.32745	2.81e-78
mmu-miR-22-5p	AGTTCTTCAGTGGCAAGCTTTA	48.5023	32.8296	659	498	1.47739	3.82e-11
mmu-miR-221-3p	AGCTACATTGTCTGCTGGGTTTC	526.533	488.752	7154	7414	1.0773	7.07e-06
mmu-miR-221-5p	ACCTGGCATACAATGTAGATTTCTGT	119.232	140.152	1620	2126	0.850731	8.87e-07
mmu-miR-222-3p	AGCTACATCTGGCTACTGGGT	86.0382	82.2058	1169	1247	1.04662	0.262654
mmu-miR-222-5p	TCAGTAGCCAGTGTAGATCCT	4.63679	5.99898	63	91	0.772929	0.11647
mmu-miR-223-3p	TGTCAGTTTGTCAAATACCCCA	1132.33	2006.56	15385	30438	0.564315	0
mmu-miR-223-5p	CGTGTATTTGACAAGCTGAGTTG	271.657	353.149	3691	5357	0.769242	5.21e-35
mmu-miR-224-3p	AAATGGTGCCCTAGTGACTACA	0.1472	0.46146	2	7		0.153696
mmu-miR-224-5p	TAAGTCACTAGTGGTTCCGTT	120.336	88.3367	1635	1340	1.36224	3.93e-17
mmu-miR-23a-3p	ATCACATTGCCAGGGATTTCC	2808.79	1471.4	38163	22320	1.90892	0
mmu-miR-23a-5p	GGGGTTCCTGGGGATGGGATTT	0.588798	0.197769	8	3		0.0997329
mmu-miR-23b-3p	ATCACATTGCCAGGGATTACC	1039.82	542.677	14128	8232	1.91609	0
mmu-miR-23b-5p	GGGTTCCTGGCATGCTGATTT	1.7664	2.83468	24	43	0.623137	0.0622632
mmu-miR-24-1-5p	GTGCCTACTGAGCTGATATCAGT	12.4384	8.76774	169	133	1.41865	0.00245605
mmu-miR-24-2-5p	GTGCCTACTGAGCTGAAACAGT	285.567	198.032	3880	3004	1.44202	9.21e-52
mmu-miR-24-3p	TGGCTCAGTTCAGCAGGAACAG	2995.81	1855.47	40704	28146	1.61459	0
mmu-miR-25-3p	CATTGCACTTGTCTCGGTCTGA	7414.59	6539.42	100742	99198	1.13383	1.94e-173
mmu-miR-25-5p	AGGCGGAGACTTGGGCAATTGC	16.928	11.7343	230	178	1.44261	0.000226354
mmu-miR-26a-1-3p	CCTATTCTTGGTTACTTGCACG	1.1776	1.58215	16	24	0.744302	0.36948
mmu-miR-26a-2-3p	CCTGTTCTTGATTACTTGTTTC	17.3696	9.09736	236	138	1.9093	7.69e-10
mmu-miR-26a-5p	TTCAAGTAATCCAGGATAGGCT	37511.5	16462.8	509669	249728	2.27857	0
mmu-miR-26b-3p	CCTGTTCTCCATTACTTGGCTC	12.2912	7.58113	167	115	1.62128	5.72e-05
mmu-miR-26b-5p	TTCAAGTAATTCAGGATAGGT	7121.81	4174.24	96764	63320	1.70614	0
mmu-miR-27a-3p	TTCACAGTGGCTAAGTTCCGC	1974.61	1568.44	26829	23792	1.25897	8.39e-148
mmu-miR-27a-5p	AGGGCTTAGCTGCTTGTGAGCA	121.145	129.077	1646	1958	0.938551	0.0578923
mmu-miR-27b-3p	TTCACAGTGGCTAAGTTCTGC	15122.3	14184.2	205467	215163	1.06614	1.07e-95
mmu-miR-27b-5p	AGAGCTTAGCTGATTGGTGAAC	24.7295	15.6237	336	237	1.58282	4.77e-08
mmu-miR-2861	GGGGCCTGGCGGCGGGCGG	0	0	0	0		0.944977
mmu-miR-28a-3p	CACTAGATTGTGAGCTGCTGGA	291.823	267.054	3965	4051	1.09275	7.2e-05
mmu-miR-28a-5p	AAGGAGCTCACAGTCTATTGAG	31.2799	28.6105	425	434	1.0933	0.190766
mmu-miR-28b	AGGAGCTCACAATCTATTTAG	0	0	0	0		0.944977
mmu-miR-28c	AGGAGCTCACAGTCTATTGA	0	0	0	0		0.944977
mmu-miR-290a-3p	AAAGTGCCGCCTAGTTTTAAGCCC	0	0	0	0		0.944977
mmu-miR-290a-5p	ACTCAAACTATGGGGGCACTTT	0	0	0	0		0.944977
mmu-miR-290b-3p	AAGTGCCCCCATAGTTTGAGTA	0	0	0	0		0.944977
mmu-miR-290b-5p	GCTTAAAACTAGGCGGCACTTT	0	0	0	0		0.944977
mmu-miR-291a-3p	AAAGTGCTTCCACTTTGTGTGC	0.1472	0.0659229	2	1		0.544816
mmu-miR-291a-5p	CATCAAAGTGGAGGCCCTCTCT	0	0	0	0		0.944977
mmu-miR-291b-3p	AAAGTGCATCCATTTTGTTTGT	0	0	0	0		0.944977
mmu-miR-291b-5p	GATCAAAGTGGAGGCCCTCTCC	0	0	0	0		0.944977
mmu-miR-292a-3p	AAAGTGCCGCCAGGTTTTGAGTGT	0.588798	0.0659229	8	1		0.0134908
mmu-miR-292a-5p	ACTCAAACTGGGGGCTCTTTTG	0.809598	0.395537	11	6	2.04683	0.156784
mmu-miR-292b-3p	AAGAGCCCCCAGTTTGAGTAT	0	0	0	0		0.944977
mmu-miR-292b-5p	ACTCAAAACCTGGCGGCACTTTT	0.0735998	0.0659229	1	1		0.917549
mmu-miR-293-3p	AGTGCCGCAGAGTTTGTAGTGT	0.367999	0	5	0		0.0222525
mmu-miR-293-5p	ACTCAAACTGTGTGACATTTTG	0.294399	0	4	0		0.0470963
mmu-miR-294-3p	AAAGTGCTTCCCTTTTGTGTGT	0.0735998	0.197769	1	3		0.447557
mmu-miR-294-5p	ACTCAAAATGGAGGCCCTATCT	0	0	0	0		0.944977
mmu-miR-295-3p	AAAGTGCTACTACTTTTGAGTCT	0.0735998	0	1	0		0.446491
mmu-miR-295-5p	ACTCAAATGTGGGGCACACTTC	0	0	0	0		0.944977
mmu-miR-296-3p	GAGGGTTGGGTGGAGGCTCTCC	15.6032	13.0527	212	198	1.19539	0.0706732
mmu-miR-296-5p	AGGGCCCCCCCTCAATCCTGT	17.1488	13.9097	233	211	1.23286	0.0274412
mmu-miR-297a-5p	ATGTATGTGTGCATGTGCATGT	1.6192	2.96653	22	45	0.545822	0.018141
mmu-miR-297b-5p	ATGTATGTGTGCATGAACATGT	1.5456	2.70284	21	41	0.571842	0.0353933
mmu-miR-297c-3p	TATACATACACACATACCCATA	21.5647	15.426	293	234	1.39795	0.000125494
mmu-miR-297c-5p	ATGTATGTGTGCATGTACATGT	0.1472	0.0659229	2	1		0.544816
mmu-miR-298-3p	GAGGAACTAGCCTTCTCTCAGC	0.1472	0.131846	2	2		0.89704
mmu-miR-298-5p	GGCAGAGGAGGGCTGTTCTTCCC	17.2224	17.074	234	259	1.00869	0.921065
mmu-miR-299a-3p	TATGTGGGACGGTAAACCGCTT	7.21278	7.11967	98	108	1.01308	0.921958
mmu-miR-299a-5p	TGGTTTACCGTCCCACATACAT	0.735998	0.659229	10	10	1.11645	0.798446
mmu-miR-299b-3p	TATGTGGGACGGTAAACC	0	0	0	0		0.944977
mmu-miR-299b-5p	GGTTTACCGTCCCACATACAT	0	0	0	0		0.944977
mmu-miR-29a-3p	TAGCACCATCTGAAATCGGTTA	5921.18	3511.05	80451	53260	1.68644	0
mmu-miR-29a-5p	ACTGATTTCTTTTGGTGTTCAG	4.56319	3.95537	62	60	1.15367	0.428253
mmu-miR-29b-1-5p	GCTGGTTTCATATGGTGGTTTA	0.883198	0.329614	12	5	2.67949	0.0577489
mmu-miR-29b-2-5p	CTGGTTTCACATGGTGGCTTAGATT	2.79679	1.71399	38	26	1.63174	0.0529295
mmu-miR-29b-3p	TAGCACCATTTGAAATCAGTGTT	359.903	295.203	4890	4478	1.21917	9.03e-22
mmu-miR-29c-3p	TAGCACCATTTGAAATCGGTTA	42.7615	28.215	581	428	1.51556	4.98e-11
mmu-miR-29c-5p	TGACCGATTTCTCCTGGTGTTC	11.408	5.20791	155	79	2.19051	5.23e-09
mmu-miR-300-3p	TATGCAAGGGCAAGCTCTCTTC	18.1792	20.8976	247	317	0.869918	0.100745
mmu-miR-300-5p	TTGAAGAGAGGTTATCCTTTGT	0.0735998	0	1	0		0.446491
mmu-miR-301a-3p	CAGTGCAATAGTATTGTCAAAGC	3.16479	3.36207	43	51	0.941323	0.77722
mmu-miR-301a-5p	GCTCTGACTTTATTGCACTACT	17.664	20.6998	240	314	0.85334	0.0642789
mmu-miR-301b-3p	CAGTGCAATGGTATTGTCAAAGC	2.06079	2.63692	28	40	0.781517	0.322674
mmu-miR-301b-5p	GCTCTGACTAGGTTGCACTACT	2.20799	3.03245	30	46	0.728122	0.178479
mmu-miR-302a-3p	TAAGTGCTTCCATGTTTTGGTGA	0	0	0	0		0.944977
mmu-miR-302a-5p	ACTTAAACGTGGTTGTACTTGC	0	0	0	0		0.944977
mmu-miR-302b-3p	TAAGTGCTTCCATGTTTTAGTAG	0	0	0	0		0.944977
mmu-miR-302b-5p	ACTTTAACATGGGAATGCTTTCT	0	0	0	0		0.944977
mmu-miR-302c-3p	AAGTGCTTCCATGTTTCAGTGG	0	0	0	0		0.944977
mmu-miR-302c-5p	GCTTTAACATGGGGTTACCTGC	0	0	0	0		0.944977
mmu-miR-302d-3p	TAAGTGCTTCCATGTTTGAGTGT	0	0	0	0		0.944977
mmu-miR-302d-5p	ACTTTAACATGGAGGCACTTGCT	0	0	0	0		0.944977
mmu-miR-3057-3p	TCCCACAGGCCCAGCTCATAGC	0	0.131846	0	2		0.293579
mmu-miR-3057-5p	ATTGGAGCTGAGATTCTGCGGGAT	3.67999	3.42799	50	52	1.07351	0.716437
mmu-miR-3058-3p	TTCCTGTCAGCCGTGGGTGCC	0.367999	0.197769	5	3		0.405638
mmu-miR-3058-5p	TCAGCCACGGCTTACCTGGAAGA	0.1472	0.263692	2	4		0.548258
mmu-miR-3059-3p	CCTCTAGGGAAGAGAAGGTTGG	0	0	0	0		0.944977
mmu-miR-3059-5p	TTTCCTCTCTGCCCCATAGGGT	0	0	0	0		0.944977
mmu-miR-3060-3p	CCATAGCACAGAAGCACTCCCA	0.220799	0.46146	3	7		0.305485
mmu-miR-3060-5p	GGGAGTGCTTCGTGCTTCTG	0	0	0	0		0.944977
mmu-miR-3061-3p	CTACCTTTGATAGTCCACTGCC	1.0304	1.25253	14	19	0.82265	0.593209
mmu-miR-3061-5p	CAGTGGGCCGTGAAAGGTAGCC	0.735998	0.593306	10	9	1.2405	0.636916
mmu-miR-3062-3p	CGGGGACACACTTTCTCCT	0	0	0	0		0.944977
mmu-miR-3062-5p	GGAGAATGTAGTGTTACCGTGA	0.1472	0.197769	2	3		0.793289
mmu-miR-3063-3p	TGAGGAATCCTGATCTCTCGCC	0	0	0	0		0.944977
mmu-miR-3063-5p	TGGAGATCAGGTTTGCACACT	0	0	0	0		0.944977
mmu-miR-3064-3p	TGCCACACTGCAACACCTTACA	1.3984	0.527383	19	8	2.65158	0.0168024
mmu-miR-3064-5p	TCTGGCTGTTGTGGTGTGCAAA	0.956798	1.4503	13	22	0.659722	0.240498
mmu-miR-3065-3p	TCAGCACCAGGATATTGTTGGGG	0	0	0	0		0.944977
mmu-miR-3065-5p	TCAACAAAATCACTGATGCTGG	0	0	0	0		0.944977
mmu-miR-3066-3p	CACTTAATAGACCGCAACCTGC	0.1472	0.0659229	2	1		0.544816
mmu-miR-3066-5p	TTGGTTGCTGTAGATTAAGTAG	12.0704	12.6572	164	192	0.953637	0.65842
mmu-miR-3067-3p	CCAAGCGGCTGCCCTGGGAGAGG	0	0	0	0		0.944977
mmu-miR-3067-5p	AGTTCTCAGGCCCGCTGTGGTGT	0	0	0	0		0.944977
mmu-miR-3068-3p	GGTGAATTGCAGTACTCCAACA	90.1598	79.3052	1225	1203	1.13687	0.00157447
mmu-miR-3068-5p	TTGGAGTTCATGCAAGTTCTAACC	111.136	87.4797	1510	1327	1.27042	1.89e-10
mmu-miR-3069-3p	TTGGACACTAAGTACTGCCACA	0.662398	1.31846	9	20	0.502404	0.0843902
mmu-miR-3069-5p	TTGGCAGTCAAGATATTGTTTAGC	0	0	0	0		0.944977
mmu-miR-3070-2-3p	TGGTGCTATGGTCAGGGGTAGA	0	0.0659229	0	1		0.556537
mmu-miR-3070-3p	TGGTGCTACCGTCAGGGGTAGA	0	0	0	0		0.944977
mmu-miR-3070-5p	AGCCCCTGACCTTGAACCTGGGA	0	0	0	0		0.944977
mmu-miR-3071-3p	ATCATCAAAACAAATGGAGTCC	0	0	0	0		0.944977
mmu-miR-3071-5p	ACTCATTTGAGACGATGATGGA	0	0	0	0		0.944977
mmu-miR-3072-3p	TGCCCCCTCCAGGAAGCCTTCT	0.1472	0.263692	2	4		0.548258
mmu-miR-3072-5p	AGGGACCCCGAGGGAGGGCAGG	0	0	0	0		0.944977
mmu-miR-3073a-3p	TTGATGTCCACTGTGACCATAG	0	0	0	0		0.944977
mmu-miR-3073a-5p	GTGGTCACAGTTGGCGCCAGCC	0	0	0	0		0.944977
mmu-miR-3073b-3p	CTGGCGCCAACTGTGACCACTG	0	0	0	0		0.944977
mmu-miR-3073b-5p	ATGGTCACAGTGGACATCAACC	0	0	0	0		0.944977
mmu-miR-3074-1-3p	GATATCAGCTCAGTAGGCACCG	1.2512	0.593306	17	9	2.10886	0.0667774
mmu-miR-3074-2-3p	TGTTTCAGCTCAGTAGGCAC	0	0	0	0		0.944977
mmu-miR-3074-5p	GTTCCTGCTGAACTGAGCCAGT	19.2831	12.3276	262	187	1.56423	2.48e-06
mmu-miR-3075-3p	ATCCTTGGCCTTCCTAGGTGT	0	0	0	0		0.944977
mmu-miR-3075-5p	TGTCTGGGAGCAGCCAAGGAC	0.0735998	0	1	0		0.446491
mmu-miR-3076-3p	CGCACTCTGGTCTTCCCTTGCAG	0.883198	0.593306	12	9	1.4886	0.368652
mmu-miR-3076-5p	CACAGGGGAAGCTCAGTGCCAGCC	0.1472	0.263692	2	4		0.548258
mmu-miR-3077-3p	CTGACTCCCTGCTTCTCCGCAG	0.588798	0.395537	8	6		0.464972
mmu-miR-3077-5p	CTGCGGACGGGTGGGCGGGCAGGCC	0	0	0	0		0.944977
mmu-miR-3078-3p	TTGCTGGGGTAGTCTTTAGG	0	0	0	0		0.944977
mmu-miR-3078-5p	CAAAGCCTAGACTGCAGCTACCT	0	0	0	0		0.944977
mmu-miR-3079-3p	CAGGCTCATCAGATGAAAGTC	0	0.0659229	0	1		0.556537
mmu-miR-3079-5p	TTTGATCTGATGAGCTAAGCTGG	0.735998	0.527383	10	8	1.39557	0.483811
mmu-miR-3080-3p	TCCTCGGGCAAAGCGCTTGACA	0	0	0	0		0.944977
mmu-miR-3080-5p	TGAAGCGCCTGTTCTTGGAT	0	0	0	0		0.944977
mmu-miR-3081-3p	TTGCGCTCCGATCTCTGAGCTGG	5.29919	5.01014	72	76	1.05769	0.729623
mmu-miR-3081-5p	GACTGGAGCTTGGAGCGGTGAGC	0	0	0	0		0.944977
mmu-miR-3082-3p	CACATGGCACTCAACTCTGCAG	5.37279	4.48276	73	68	1.19855	0.281592
mmu-miR-3082-5p	GACAGAGTGTGTGTGTCTGTGT	0.1472	0.263692	2	4		0.548258
mmu-miR-3083-3p	TCCGAAACATTCCCAGCCTTTA	0	0	0	0		0.944977
mmu-miR-3083-5p	AGGCTGGGAATATTTCAGAGAT	0.1472	0.0659229	2	1		0.544816
mmu-miR-3084-3p	TTCTGCCAGTCTCCTTCAGAC	1.3248	1.05477	18	16	1.25601	0.505786
mmu-miR-3084-5p	GTTGAAGGTTAATTAGCAGAGT	2.87039	2.17545	39	33	1.31944	0.240466
mmu-miR-3085-3p	TCTGGCTGCTATGGCCCCCTC	0	0	0	0		0.944977
mmu-miR-3085-5p	AGGTGCCATTCCGAGGGCCAAGAGT	0	0	0	0		0.944977
mmu-miR-3086-3p	CCCAATGAGCCTACAGTCTAAG	0	0	0	0		0.944977
mmu-miR-3086-5p	TAGATTGTAGGCCCATTGGA	0	0.197769	0	3		0.154866
mmu-miR-3087-3p	TAACTCACTGTCATGTCCTCA	0.220799	0.131846	3	2		0.58737
mmu-miR-3087-5p	CAGGGCAGGGCAAGAGTTGAG	0	0	0	0		0.944977
mmu-miR-3088-3p	TTCATGAGCAGCTGCAAAGGTGT	0.294399	0.395537	4	6		0.679365
mmu-miR-3088-5p	GCTATGCAGTTGTTCATGAGCT	0	0	0	0		0.944977
mmu-miR-3089-3p	AGCATCTGCTGATCCTGAGCTGT	0.220799	0.131846	3	2		0.58737
mmu-miR-3089-5p	TGAGTTCAGGGACAGCGTGTCT	0	0	0	0		0.944977
mmu-miR-3090-3p	TCCCAGGTGACACCCTGACTCA	0	0.0659229	0	1		0.556537
mmu-miR-3090-5p	GTCTGGGTGGGGCCTGAGATC	0	0	0	0		0.944977
mmu-miR-3091-3p	CGGGCCTGACCAGTCTCAAGAC	1.2512	1.12069	17	17	1.11645	0.742835
mmu-miR-3091-5p	CATGGGTCTGGTTGGGCCCGC	0	0.197769	0	3		0.154866
mmu-miR-3092-3p	GAATGGGGCTGTTTCCCCTCC	0	0	0	0		0.944977
mmu-miR-3092-5p	AGGGGAAAATGCCTTTCTCCCA	0	0	0	0		0.944977
mmu-miR-3093-3p	TGTGGACACCGTGGGAGGTTGG	0	0	0	0		0.944977
mmu-miR-3093-5p	CGCACCCCGCGGAGCTCACACT	0	0	0	0		0.944977
mmu-miR-3094-3p	CCTTTAAATTGTGTCCTCAAG	0.441599	0.263692	6	4		0.431868
mmu-miR-3094-5p	TGTTGGGGACATTTTTAAAGC	0.1472	0	2	0		0.210962
mmu-miR-3095-3p	TGGACACTGGAGAGAGAGCTTTT	0.956798	0.329614	13	5	2.90278	0.0361522
mmu-miR-3095-5p	AAGCTTTCTCATCTGTGACACT	0.0735998	0.0659229	1	1		0.917549
mmu-miR-3097-3p	CTCAGACCTTTCTACCTGTCAG	0.588798	0.395537	8	6		0.464972
mmu-miR-3097-5p	CACAGGTGGGAAGTGTGTGTCCA	0.220799	0	3	0		0.0996771
mmu-miR-3098-3p	TTCTGCTGCCTGCCTTTAGGA	0.220799	0.46146	3	7		0.305485
mmu-miR-3098-5p	TCCTAACAGCAGGAGTAGGAGC	0.294399	0.791075	4	12	0.372151	0.0813888
mmu-miR-3099-3p	TAGGCTAGAGAGAGGTTGGGGA	0	0	0	0		0.944977
mmu-miR-3099-5p	CCAGCTTCCTTCCAGCCCTTG	0	0	0	0		0.944977
mmu-miR-30a-3p	CTTTCAGTCGGATGTTTGCAGC	428.498	240.618	5822	3650	1.78082	1.44e-169
mmu-miR-30a-5p	TGTAAACATCCTCGACTGGAAG	5866.64	3727.61	79710	56545	1.57383	0
mmu-miR-30b-3p	CTGGGATGTGGATGTTTACGTC	61.8238	47.2667	840	717	1.30798	1.22e-07
mmu-miR-30b-5p	TGTAAACATCCTACACTCAGCT	2046.88	1513.26	27811	22955	1.35263	5.9e-253
mmu-miR-30c-1-3p	CTGGGAGAGGGTTGTTTACTCC	31.4271	18.4584	427	280	1.70259	2.45e-12
mmu-miR-30c-2-3p	CTGGGAGAAGGCTGTTTACTCT	106.278	50.8265	1444	771	2.091	1.06e-64
mmu-miR-30c-5p	TGTAAACATCCTACACTCTCAGC	6891.89	3775.47	93640	57271	1.82544	0
mmu-miR-30d-3p	CTTTCAGTCAGATGTTTGCTGC	38.3455	40.3448	521	612	0.950445	0.395025
mmu-miR-30d-5p	TGTAAACATCCCCGACTGGAAG	13788.7	8504.05	187347	129000	1.62143	0
mmu-miR-30e-3p	CTTTCAGTCGGATGTTTACAGC	1386.47	914.284	18838	13869	1.51646	2.36e-307
mmu-miR-30e-5p	TGTAAACATCCTTGACTGGAAG	805.918	636.156	10950	9650	1.26686	1.53e-64
mmu-miR-30f	GTAAACATCCGACTGAAAGCTC	0	0	0	0		0.944977
mmu-miR-31-3p	TGCTATGCCAACATATTGCCATC	1.3248	0.659229	18	10	2.00962	0.0737346
mmu-miR-31-5p	AGGCAAGATGCTGGCATAGCTG	15.456	7.38336	210	112	2.09335	9.25e-11
mmu-miR-3100-3p	CTGTGACACACCCGCTCCCAG	0	0	0	0		0.944977
mmu-miR-3100-5p	TTGGGAACGGGGTGTCTTTGGGA	0.0735998	0.263692	1	4		0.274691
mmu-miR-3101-3p	TAGCTTTGGTGGATGGTCTTT	0.1472	0	2	0		0.210962
mmu-miR-3101-5p	GGTACCATTGACTAAAGCTAG	0	0.0659229	0	1		0.556537
mmu-miR-3102-3p	GAGCACCCCATTGGCTACCCACA	3.09119	1.38438	42	21	2.23291	0.00203703
mmu-miR-3102-3p.2-3p	CTCTACTCCCTGCCCCAGCCA	0.220799	0.197769	3	3		0.880001
mmu-miR-3102-5p	GTGAGTGGCCAGGGTGGGGCTG	0	0	0	0		0.944977
mmu-miR-3102-5p.2-5p	GGTGGTGCAGGCAGGAGAGCC	0.220799	0.197769	3	3		0.880001
mmu-miR-3103-3p	TAACCTCTGATCCTTCCCACAG	0.1472	0.263692	2	4		0.548258
mmu-miR-3103-5p	GGAGGGAGGATCTGCTGTTAG	0	0	0	0		0.944977
mmu-miR-3104-3p	ACGCTCTGCTTTGCTCCCCCAGA	0	0	0	0		0.944977
mmu-miR-3104-5p	TAGGGGGCAGGAGCCGGAGCCCTCT	0	0	0	0		0.944977
mmu-miR-3105-3p	ACTGCTTATGAGCTTGCACTCC	0	0	0	0		0.944977
mmu-miR-3105-5p	AGAGCAAGCCCGTAAGCAGCGT	0	0	0	0		0.944977
mmu-miR-3106-3p	GCTGCCTATACATGGGCTTTCC	0	0	0	0		0.944977
mmu-miR-3106-5p	TGGCTCATTTAGAAGCAGCCA	0	0	0	0		0.944977
mmu-miR-3108-3p	CGTCTAGGTCTAGAGTCTCAA	0	0	0	0		0.944977
mmu-miR-3108-5p	GTCTCTAAAGCTAGACGTTCCGG	0	0	0	0		0.944977
mmu-miR-3109-3p	TAGGGCCATCTCATCCAGATA	0.294399	0.329614	4	5		0.892472
mmu-miR-3109-5p	AATGGATGCGATGGTTCCCATGCT	0.220799	0.131846	3	2		0.58737
mmu-miR-3110-3p	GCACTCCATCGGAGGCAGACAC	0	0	0	0		0.944977
mmu-miR-3110-5p	TTCTGCCTCCCCTGAAGGCTC	0	0	0	0		0.944977
mmu-miR-3112-3p	CAGTTTGTCTCTTCTTTGTCT	0.220799	0.0659229	3	1		0.31
mmu-miR-3112-5p	ACATAGAAAAGGCAGTCTGCA	0.588798	0.263692	8	4		0.1897
mmu-miR-3113-3p	TCCTGGCCCTGGTCCTGGTC	0	0	0	0		0.944977
mmu-miR-3113-5p	GTCCTGGCCCTGGTCCGGGTCC	0	0	0	0		0.944977
mmu-miR-3154	CAGAAGGGGAGTCGGGAGCGGA	0.367999	0.0659229	5	1		0.092683
mmu-miR-32-3p	CAATTTAGTGTGTGTGATATT	8.68478	8.17444	118	124	1.06243	0.635267
mmu-miR-32-5p	TATTGCACATTACTAAGTTGCA	245.087	232.114	3330	3521	1.05589	0.0244602
mmu-miR-320-3p	AAAAGCTGGGTTGAGAGGGCGA	290.278	229.346	3944	3479	1.26568	3.56e-24
mmu-miR-320-5p	GCCTTCTCTTCCCGGTTCTTCC	0	0	0	0		0.944977
mmu-miR-322-3p	AAACATGAAGCGCTGCAACAC	240.009	198.164	3261	3006	1.21116	3.42e-14
mmu-miR-322-5p	CAGCAGCAATTCATGTTTTGGA	133.142	109.696	1809	1664	1.21374	1.15e-08
mmu-miR-323-3p	CACATTACACGGTCGACCTCT	0.735998	0.725152	10	11	1.01496	0.961117
mmu-miR-323-5p	AGGTGGTCCGTGGCGCGTTCGC	0	0	0	0		0.944977
mmu-miR-324-3p	CCACTGCCCCAGGTGCTGCT	1.6928	2.57099	23	39	0.658421	0.112236
mmu-miR-324-5p	CGCATCCCCTAGGGCATTGGTGT	27.9679	16.0193	380	243	1.74589	6.07e-12
mmu-miR-325-3p	TTTATTGAGCACCTCCTATCAA	0.0735998	0.0659229	1	1		0.917549
mmu-miR-325-5p	CCTAGTAGGTGCTCAGTAAGTGT	0.1472	0	2	0		0.210962
mmu-miR-326-3p	CCTCTGGGCCCTTCCTCCAGT	188.342	73.8336	2559	1120	2.5509	1.3e-164
mmu-miR-326-5p	GGGGGCAGGGCCTTTGTGAAGGCG	0	0.0659229	0	1		0.556537
mmu-miR-327	ACTTGAGGGGCATGAGGAT	0	0	0	0		0.944977
mmu-miR-328-3p	CTGGCCCTCTCTGCCCTTCCGT	645.838	460.471	8775	6985	1.40256	1.38e-99
mmu-miR-328-5p	GGGGGGCAGGAGGGGCTCAGGG	0.441599	0.791075	6	12	0.558227	0.253937
mmu-miR-329-3p	AACACACCCAGCTAACCTTTTT	5.00479	3.62576	68	55	1.38034	0.0747728
mmu-miR-329-5p	AGAGGTTTTCTGGGTCTCTGTT	5.44639	3.03245	74	46	1.79603	0.00157708
mmu-miR-33-3p	CAATGTTTCCACAGTGCATCAC	6.25598	4.35091	85	66	1.43786	0.026299
mmu-miR-33-5p	GTGCATTGTAGTTGCATTGCA	1.98719	3.09838	27	47	0.641367	0.0649247
mmu-miR-330-3p	GCAAAGCACAGGGCCTGCAGAGA	9.71517	5.80121	132	88	1.67468	0.000153039
mmu-miR-330-5p	TCTCTGGGCCTGTGTCTTAGGC	40.1119	40.7403	545	618	0.984574	0.793083
mmu-miR-331-3p	GCCCCTGGGCCTATCCTAGAA	22.3007	13.9097	303	211	1.60325	1.08e-07
mmu-miR-331-5p	CTAGGTATGGTCCCAGGGATCC	3.82719	3.55984	52	54	1.0751	0.705684
mmu-miR-335-3p	TTTTTCATTATTGCTCCTGACC	69.2574	57.6166	941	874	1.20204	8.88e-05
mmu-miR-335-5p	TCAAGAGCAATAACGAAAAATGT	22.5215	14.1734	306	215	1.589	1.53e-07
mmu-miR-337-3p	TCAGCTCCTATATGATGCCTTT	0.515199	0.527383	7	8		0.979998
mmu-miR-337-5p	CGGCGTCATGCAGGAGTTGATT	7.13918	6.98782	97	106	1.02166	0.875097
mmu-miR-338-3p	TCCAGCATCAGTGATTTTGTTG	7.13918	5.01014	97	76	1.42495	0.0203359
mmu-miR-338-5p	AACAATATCCTGGTGCTGAGTG	25.2447	25.3803	343	385	0.994658	0.944703
mmu-miR-339-3p	TGAGCGCCTCGGCGACAGAGCCG	42.6879	29.5334	580	448	1.44541	3.96e-09
mmu-miR-339-5p	TCCCTGTCCTCCAGGAGCTCACG	177.817	129.143	2416	1959	1.3769	4.78e-26
mmu-miR-340-3p	TCCGTCTCAGTTACTTTATAGC	131.596	129.143	1788	1959	1.019	0.564312
mmu-miR-340-5p	TTATAAAGCAATGAGACTGATT	3444.47	4647.89	46800	70505	0.741082	0
mmu-miR-341-3p	TCGGTCGATCGGTCGGTCGGT	3.53279	3.29614	48	50	1.0718	0.727571
mmu-miR-341-5p	CGGTCGGCCGATCGCTCGGTC	0	0.0659229	0	1		0.556537
mmu-miR-342-3p	TCTCACACAGAAATCGCACCCGT	1376.17	998.006	18698	15139	1.37892	3.85e-191
mmu-miR-342-5p	AGGGGTGCTATCTGTGATTGAG	14.2048	7.97667	193	121	1.78079	4.45e-07
mmu-miR-343	TCTCCCTTCATGTGCCCAGA	0	0	0	0		0.944977
mmu-miR-344-3p	TGATCTAGCCAAAGCCTGACTGT	10.7456	6.19675	146	94	1.73407	2.5e-05
mmu-miR-344-5p	AGTCAGGCTCCTGGCTAGATTCCAGG	0	0	0	0		0.944977
mmu-miR-344b-3p	CATTTAGCCAAAGCCTGACTGT	0	0.263692	0	4		0.0816938
mmu-miR-344b-5p	AGTCAGGCTCCTGGCTAAAGTTC	0	0	0	0		0.944977
mmu-miR-344c-3p	TGATCTAGTCAAAGCCTGACAGT	0	0.0659229	0	1		0.556537
mmu-miR-344c-5p	AGTCAGGCTGCTGGCTAGAGTAC	0	0	0	0		0.944977
mmu-miR-344d-1-5p	AGTCAGGCTGCTGGCTATACACCA	0	0	0	0		0.944977
mmu-miR-344d-2-5p	AGTCTGGTTGCTGGCTATATTCCA	0	0	0	0		0.944977
mmu-miR-344d-3-5p	AGTCAGGCTAGTGGTTATACTCC	0	0	0	0		0.944977
mmu-miR-344d-3p	GATATAACCACTGCCAGACTGA	0.1472	0.329614	2	5		0.367298
mmu-miR-344e-3p	GATATAACCAAAGCCTGACTAT	0	0	0	0		0.944977
mmu-miR-344f-3p	CTCTAGCCAGGACCTGACTAC	0	0	0	0		0.944977
mmu-miR-344f-5p	AGTCAGTCTCCTGGCTGGAGTC	0	0	0	0		0.944977
mmu-miR-344g-3p	CAGGCTCTAGCCAGGGGCTTGA	0	0	0	0		0.944977
mmu-miR-344g-5p	AGTCAGGCTCCTGGCAGGAGT	0	0	0	0		0.944977
mmu-miR-344h-3p	GGTATAACCAAAGCCCGACTGT	0	0	0	0		0.944977
mmu-miR-344h-5p	CAGGCTTCTGGCTATATTCC	0	0	0	0		0.944977
mmu-miR-344i	AAGTCAGGCTCCTGGCTGGA	0	0	0	0		0.944977
mmu-miR-345-3p	CCTGAACTAGGGGTCTGGAGAC	60.499	49.0466	822	744	1.2335	3.31e-05
mmu-miR-345-5p	GCTGACCCCTAGTCCAGTGCTT	22.9631	18.0629	312	274	1.27129	0.00369183
mmu-miR-346-3p	AGGCAGGGGCTGGGCCTGCAGC	0	0	0	0		0.944977
mmu-miR-346-5p	TGTCTGCCCGAGTGCCTGCCTCT	0.294399	0.46146	4	7		0.502711
mmu-miR-3470a	TCACTTTGTAGACCAGGCTGG	1.104	1.77992	15	27	0.620252	0.139377
mmu-miR-3470b	TCACTCTGTAGACCAGGCTGG	7.35998	11.2069	100	170	0.656737	0.000740873
mmu-miR-3471	TGAGATCCAACTGTAAGGCATT	0.1472	0.197769	2	3		0.793289
mmu-miR-3472	TAATAGCCAGAAGCTGGAAGGAACC	0	0	0	0		0.944977
mmu-miR-3473a	TGGAGAGATGGCTCAGCA	0.0735998	0.395537	1	6		0.0979197
mmu-miR-3473b	GGGCTGGAGAGATGGCTCAG	0.956798	0.791075	13	12	1.20949	0.631953
mmu-miR-3473c	TCTCTCCAGCCCCCATAATAAG	0	0	0	0		0.944977
mmu-miR-3473d	CCACTGAGCCACTTTCCAGCCCTT	2.35519	1.4503	32	22	1.62393	0.0784946
mmu-miR-3473e	GGGCTGGAGAGATGGCTCGTA	0	0	0	0		0.944977
mmu-miR-3473f	CAAATAGGACTGGAGAGATG	0	0	0	0		0.944977
mmu-miR-3473g	CAAAAGTGAGGCTGGGGAGA	0	0	0	0		0.944977
mmu-miR-3474	CCCTGGGAGGAGACGTGGATTC	2.20799	1.64807	30	25	1.33974	0.279527
mmu-miR-3475-3p	TCTGGAGGCACATGGTTTGAA	0.0735998	0	1	0		0.446491
mmu-miR-3475-5p	AAATCATGTACCCCCACAGAGG	0	0	0	0		0.944977
mmu-miR-34a-3p	AATCAGCAAGTATACTGCCCT	0.1472	0.197769	2	3		0.793289
mmu-miR-34a-5p	TGGCAGTGTCTTAGCTGGTTGT	34.5919	38.8286	470	589	0.890888	0.0617281
mmu-miR-34b-3p	AATCACTAACTCCACTGCCATC	2.87039	1.05477	39	16	2.72135	0.000426176
mmu-miR-34b-5p	AGGCAGTGTAATTAGCTGATTGT	0.1472	0.0659229	2	1		0.544816
mmu-miR-34c-3p	AATCACTAACCACACAGCCAGG	1.84	0.659229	25	10	2.79113	0.00422733
mmu-miR-34c-5p	AGGCAGTGTAGTTAGCTGATTGC	66.2398	63.3519	900	961	1.04559	0.335986
mmu-miR-350-3p	TTCACAAAGCCCATACACTTTC	105.101	69.2849	1428	1051	1.51693	5.5e-25
mmu-miR-350-5p	AAAGTGCATGCGCTTTGGG	0.0735998	0.131846	1	2		0.709718
mmu-miR-351-3p	GGTCAAGAGGCGCCTGGGAAC	1.6192	1.31846	22	20	1.2281	0.504363
mmu-miR-351-5p	TCCCTGAGGAGCCCTTTGAGCCTG	254.14	137.647	3453	2088	1.84632	3.07e-112
mmu-miR-3535	TGGATATGATGACTGATTACCTGAGA	800.104	486.643	10871	7382	1.64413	1.58e-243
mmu-miR-3544-3p	ACTCCTGCATGACGCCGTTCCC	0	0	0	0		0.944977
mmu-miR-3544-5p	AGAAAGGCATCATATAGGAGCTG	0	0	0	0		0.944977
mmu-miR-3547-3p	TGAGCACCACCCCTCTCTCAG	0.1472	0	2	0		0.210962
mmu-miR-3547-5p	GTGGGAAGAGGGGTGGGGCCCGGGA	0	0	0	0		0.944977
mmu-miR-3552	AGGCTGCAGGCCCACTTCCCT	0	0	0	0		0.944977
mmu-miR-3569-3p	TCAGTCTGCGCTCCTCTCCAGC	0.588798	0.0659229	8	1		0.0134908
mmu-miR-3569-5p	TCGGAGGAGAGCAGACCGGTG	0.0735998	0.0659229	1	1		0.917549
mmu-miR-3572-3p	TACACTTGTCCTTCTTTCCCCAG	1.104	0.725152	15	11	1.52244	0.290437
mmu-miR-3572-5p	TGGGGAACAGGGCAAGGTGGAC	0.220799	0.131846	3	2		0.58737
mmu-miR-361-3p	TCCCCCAGGTGTGATTCTGATTTGT	1242.51	1161.63	16882	17621	1.06963	4.14e-10
mmu-miR-361-5p	TTATCAGAATCTCCAGGGGTAC	202.767	127.363	2755	1932	1.59204	2.46e-56
mmu-miR-3618-3p	CTACATTAATGAAAAGAGCAAT	0	0	0	0		0.944977
mmu-miR-3618-5p	TGTGATTTCCAATAATTGAGGC	0	0	0	0		0.944977
mmu-miR-362-3p	AACACACCTGTTCAAGGATTCA	56.6719	52.4087	770	795	1.08134	0.121751
mmu-miR-362-5p	AATCCTTGGAACCTAGGTGTGAAT	39.9647	41.5973	543	631	0.960751	0.495329
mmu-miR-3620-3p	CTGCTCAGCCCCGCCCACCCCA	0	0	0	0		0.944977
mmu-miR-3620-5p	CTGTGGGCTGGGCTGGGAAGCA	0	0	0	0		0.944977
mmu-miR-363-3p	AATTGCACGGTATCCATCTGTA	68.7422	88.7322	934	1346	0.774716	1.65e-09
mmu-miR-363-5p	CAGGTGGAACACGATGCAATTT	9.12638	9.09736	124	138	1.00319	0.975898
mmu-miR-365-1-5p	AGGGACTTTTGGGGGCAGATGTG	1.104	0.988843	15	15	1.11645	0.757269
mmu-miR-365-2-5p	AGGGACTTTCAGGGGCAGCTGTG	0.956798	1.12069	13	17	0.853758	0.682592
mmu-miR-365-3p	TAATGCCCCTAAAAATCCTTAT	35.9167	16.9422	488	257	2.11996	1.23e-23
mmu-miR-367-3p	AATTGCACTTTAGCAATGGTGA	0	0	0	0		0.944977
mmu-miR-367-5p	ACTGTTGCTAACATGCAACTC	0	0	0	0		0.944977
mmu-miR-369-3p	AATAATACATGGTTGATCTTT	1.3984	3.49391	19	53	0.400238	0.00032978
mmu-miR-369-5p	AGATCGACCGTGTTATATTCGC	0.735998	0.263692	10	4	2.79113	0.0758029
mmu-miR-370-3p	GCCTGCTGGGGTGGAACCTGGT	3.38559	4.41683	46	67	0.76652	0.166375
mmu-miR-370-5p	CAGGTCACGTCTCTGCAGTT	0	0	0	0		0.944977
mmu-miR-374b-3p	GGTTGTATTATCATTGTCCGAG	0	0	0	0		0.944977
mmu-miR-374b-5p	ATATAATACAACCTGCTAAGTG	2447.93	1690.79	33260	25648	1.4478	0
mmu-miR-374c-3p	ACTTAGCAGGTTGTATTAT	0.220799	0.263692	3	4		0.849858
mmu-miR-374c-5p	ATAATACAACCTGCTAAGTG	0	0	0	0		0.944977
mmu-miR-375-3p	TTTGTTCGTTCGGCTCGCGTGA	175.756	8.50405	2388	129	20.6674	0
mmu-miR-375-5p	GCGACGAGCCCCTCGCACAAAC	0	0	0	0		0.944977
mmu-miR-376a-3p	ATCGTAGAGGAAAATCCACGT	0.0735998	0.131846	1	2		0.709718
mmu-miR-376a-5p	GGTAGATTCTCCTTCTATGAGT	0.1472	0.131846	2	2		0.89704
mmu-miR-376b-3p	ATCATAGAGGAACATCCACTT	1.5456	1.58215	21	24	0.976897	0.947062
mmu-miR-376b-5p	GTGGATATTCCTTCTATGGTTA	2.06079	1.05477	28	16	1.95379	0.0303162
mmu-miR-376c-3p	AACATAGAGGAAATTTCACGT	2.06079	2.37322	28	36	0.868353	0.584113
mmu-miR-376c-5p	GTGGATATTCCTTCTATGTTTA	0	0.0659229	0	1		0.556537
mmu-miR-377-3p	ATCACACAAAGGCAACTTTTGT	0.1472	0.0659229	2	1		0.544816
mmu-miR-377-5p	AGAGGTTGCCCTTGGTGAATTC	0.0735998	0	1	0		0.446491
mmu-miR-378a-3p	ACTGGACTTGGAGTCAGAAGG	5700.45	7497.01	77452	113724	0.760363	0
mmu-miR-378a-5p	CTCCTGACTCCAGGTCCTGTGT	52.9183	55.1774	719	837	0.959056	0.411989
mmu-miR-378b	CTGGACTTGGAGTCAGAAGA	184.22	267.581	2503	4059	0.688466	5.68e-50
mmu-miR-378c	ACTGGACTTGGAGTCAGAAGC	34.2239	67.8346	465	1029	0.50452	8.77e-37
mmu-miR-378d	ACTGGCCTTGGAGTCAGAAGGT	1.2512	1.05477	17	16	1.18623	0.620924
mmu-miR-379-3p	TATGTAACATGGTCCACTAACT	1.9136	1.97769	26	30	0.967593	0.910837
mmu-miR-379-5p	TGGTAGACTATGGAACGTAGG	114.227	125.188	1552	1899	0.912446	0.00737096
mmu-miR-380-3p	TATGTAGTATGGTCCACATCTT	0.662398	0.395537	9	6		0.331442
mmu-miR-380-5p	ATGGTTGACCATAGAACATGCG	0.956798	1.58215	13	24	0.604745	0.145861
mmu-miR-381-3p	TATACAAGGGCAAGCTCTCTGT	53.6543	65.3296	729	991	0.821286	5.15e-05
mmu-miR-381-5p	AGCGAGGTTGCCCTTTGTATATT	0	0	0	0		0.944977
mmu-miR-382-3p	TCATTCACGGACAACACTTTTT	17.5168	12.855	238	195	1.36265	0.00131473
mmu-miR-382-5p	GAAGTTGTTCGTGGTGGATTCG	9.64157	7.51521	131	114	1.28294	0.0513666
mmu-miR-383-3p	CCACAGCACTGCCTGGTCAGA	0.0735998	0	1	0		0.446491
mmu-miR-383-5p	AGATCAGAAGGTGACTGTGGCT	4.93119	1.84584	67	28	2.67151	4.89e-06
mmu-miR-384-3p	ATTCCTAGAAATTGTTCACAAT	0.367999	0.197769	5	3		0.405638
mmu-miR-384-5p	TGTAAACAATTCCTAGGCAATGT	0.294399	0	4	0		0.0470963
mmu-miR-3960	GGCGGCGGCGGAGGCGGGGG	0	0	0	0		0.944977
mmu-miR-3961	TGCCCTCAGCTCAGTTGGA	0	0	0	0		0.944977
mmu-miR-3962	AGGTAGTAGTTTGTACATTT	1847.43	1587.42	25101	24080	1.16379	1.85e-63
mmu-miR-3963	TGTATCCCACTTCTGACAC	0.809598	1.31846	11	20	0.614049	0.198476
mmu-miR-3964	ATAAGGTAGAAAGCACTAAA	2.20799	2.24138	30	34	0.985106	0.95992
mmu-miR-3965	TGCTTATCAGCCTGATGTT	1.6928	0.593306	23	9	2.85316	0.0053711
mmu-miR-3966	AGCTGCCAGCTGTAGAACTGT	0	0	0	0		0.944977
mmu-miR-3967	AGCTTGTCTGACTGATGTTG	0	0	0	0		0.944977
mmu-miR-3968	CGAATCCCACTCCAGACACCA	0	0	0	0		0.944977
mmu-miR-3969	CCCTAAAGTAGAAATCACTA	0.0735998	0.197769	1	3		0.447557
mmu-miR-3970	GAGGTTGTAGTTTGTGCTTT	0	0.593306	0	9		0.00333694
mmu-miR-3971	CTCCCCACCCCTGTACCAGTGA	0	0	0	0		0.944977
mmu-miR-409-3p	GAATGTTGCTCGGTGAACCCCT	9.86237	12.9209	134	196	0.763289	0.0155931
mmu-miR-409-5p	AGGTTACCCGAGCAACTTTGCAT	7.50718	6.9219	102	105	1.08455	0.557131
mmu-miR-410-3p	AATATAACACAGATGGCCTGT	1.472	1.64807	20	25	0.893163	0.717645
mmu-miR-410-5p	AGGTTGTCTGTGATGAGTTCG	0	0	0	0		0.944977
mmu-miR-411-3p	TATGTAACACGGTCCACTAACC	4.71039	3.03245	64	46	1.55333	0.021931
mmu-miR-411-5p	TAGTAGACCGTATAGCGTACG	32.0159	24.0618	435	365	1.33057	5.5e-05
mmu-miR-412-3p	TTCACCTGGTCCACTAGCCG	0	0	0	0		0.944977
mmu-miR-412-5p	TGGTCGACCAGCTGGAAAGTAAT	0	0	0	0		0.944977
mmu-miR-421-3p	ATCAACAGACATTAATTGGGCGC	49.9743	33.1592	679	503	1.5071	2.25e-12
mmu-miR-421-5p	CTCATTAAATGTTTGTTGAAT	0.294399	0	4	0		0.0470963
mmu-miR-423-3p	AGCTCGGTCTGAGGCCCCTCAGT	1436.96	1236.71	19524	18760	1.16192	8.7e-49
mmu-miR-423-5p	TGAGGGGCAGAGAGCGAGACTTT	909.473	773.078	12357	11727	1.17643	1.96e-36
mmu-miR-425-3p	ATCGGGAATGTCGTGTCCGCC	71.7598	66.3843	975	1007	1.08098	0.0829963
mmu-miR-425-5p	AATGACACGATCACTCCCGTTGA	298.079	264.219	4050	4008	1.12815	6.25e-08
mmu-miR-429-3p	TAATACTGTCTGGTAATGCCGT	13.7632	4.94422	187	75	2.78369	2.85e-15
mmu-miR-429-5p	GTCTTACCAGACATGGTTAGA	0	0	0	0		0.944977
mmu-miR-431-3p	CAGGTCGTCTTGCAGGGCTTCT	0.441599	0.395537	6	6		0.839612
mmu-miR-431-5p	TGTCTTGCAGGCCGTCATGCA	1.104	1.64807	15	25	0.669872	0.224852
mmu-miR-432	TCTTGGAGTAGATCAGTGGGCAG	0	0	0	0		0.944977
mmu-miR-433-3p	ATCATGATGGGCTCCTCGGTGT	2.06079	1.58215	28	24	1.30253	0.341333
mmu-miR-433-5p	TACGGTGAGCCTGTCATTATTC	0.0735998	0.0659229	1	1		0.917549
mmu-miR-434-3p	TTTGAACCATCACTCGACTCCT	27.6735	12.4594	376	189	2.22109	2.61e-20
mmu-miR-434-5p	GCTCGACTCATGGTTTGAACCA	77.1326	61.9016	1048	939	1.24605	9.55e-07
mmu-miR-448-3p	TTGCATATGTAGGATGTCCCAT	0	0	0	0		0.944977
mmu-miR-448-5p	GAACATCCTGCATAGTGCTGCC	0	0	0	0		0.944977
mmu-miR-449a-3p	CAGCTAACATGCGACTGCTCTC	0.0735998	0	1	0		0.446491
mmu-miR-449a-5p	TGGCAGTGTATTGTTAGCTGGT	2.64959	2.37322	36	36	1.11645	0.636865
mmu-miR-449b	AGGCAGTGTTGTTAGCTGGC	0	0	0	0		0.944977
mmu-miR-449c-3p	CAGTTGCTAGCTGCACTACCCT	0	0	0	0		0.944977
mmu-miR-449c-5p	AGGCAGTGCATTGCTAGCTGG	0	0	0	0		0.944977
mmu-miR-450a-1-3p	ATTGGGAACATTTTGCATAAAT	0.1472	0.197769	2	3		0.793289
mmu-miR-450a-2-3p	ATTGGGGATGCTTTGCATTCAT	0.367999	0.395537	5	6		0.926681
mmu-miR-450a-5p	TTTTGCGATGTGTTCCTAATAT	81.107	96.9066	1102	1470	0.83696	7.45e-06
mmu-miR-450b-3p	ATTGGGAACATTTTGCATGCAT	3.38559	3.29614	46	50	1.02714	0.890476
mmu-miR-450b-5p	TTTTGCAGTATGTTCCTGAATA	38.4191	69.219	522	1050	0.555037	1.6e-29
mmu-miR-451a	AAACCGTTACCATTACTGAGTT	7333.71	13460.9	99643	204192	0.544814	0
mmu-miR-451b	TGGGAGCAGCAAGAGAACCGT	0	0	0	0		0.944977
mmu-miR-452-3p	TCAGTCTCATCTGCAAAGAGGT	0.441599	0.593306	6	9		0.599561
mmu-miR-452-5p	TGTTTGCAGAGGAAACTGAGAC	0.662398	0.197769	9	3		0.0597474
mmu-miR-453	AGGTTGCCTCATAGTGAGCTTGCA	0	0	0	0		0.944977
mmu-miR-455-3p	GCAGTCCACGGGCATATACAC	93.1038	35.928	1265	545	2.5914	1.96e-84
mmu-miR-455-5p	TATGTGCCTTTGGACTACATCG	525.355	285.644	7138	4333	1.8392	1.97e-227
mmu-miR-463-3p	TGATAGACACCATATAAGGTAG	0	0	0	0		0.944977
mmu-miR-463-5p	TACCTAATTTGTTGTCCATCAT	0	0	0	0		0.944977
mmu-miR-465a-5p	TATTTAGAATGGCACTGATGTGA	0	0	0	0		0.944977
mmu-miR-465b-5p	TATTTAGAATGGTGCTGATCTG	0	0	0	0		0.944977
mmu-miR-465c-3p	GATCAGGGCCTTTCTAAGTAGA	0	0	0	0		0.944977
mmu-miR-465c-5p	TATTTAGAATGGCGCTGATCTG	0	0	0	0		0.944977
mmu-miR-465d-3p	TGATCAGGGCCTTTCTGAGTAA	0	0	0	0		0.944977
mmu-miR-465d-5p	TATTTAGAATGGTACTGATGTGA	0	0	0	0		0.944977
mmu-miR-466a-5p	TATGTGTGTGTACATGTACATA	0	0	0	0		0.944977
mmu-miR-466c-5p	TGATGTGTGTGTGCATGTACATAT	10.2304	14.9645	139	227	0.683643	0.00036292
mmu-miR-466d-3p	TATACATACACGCACACATAG	33.9295	20.6339	461	313	1.64436	6.78e-12
mmu-miR-466d-5p	TGTGTGTGCGTACATGTACATG	0	0.0659229	0	1		0.556537
mmu-miR-466e-3p	TATACATACACGCACACATAAGA	8.16958	10.0862	111	153	0.809976	0.0910322
mmu-miR-466e-5p	GATGTGTGTGTACATGTACATA	0.0735998	0.131846	1	2		0.709718
mmu-miR-466f	ACGTGTGTGTGCATGTGCATGT	0.735998	1.31846	10	20	0.558227	0.133321
mmu-miR-466f-3p	CATACACACACACATACACAC	0.294399	0	4	0		0.0470963
mmu-miR-466f-5p	TACGTGTGTGTGCATGTGCATG	0	0	0	0		0.944977
mmu-miR-466g	ATACAGACACATGCACACACA	3.90079	3.95537	53	60	0.9862	0.947011
mmu-miR-466h-3p	TACGCACGCACACACACAC	0.588798	1.4503	8	22	0.405983	0.0244337
mmu-miR-466h-5p	TGTGTGCATGTGCTTGTGTGTA	6.84478	6.26267	93	95	1.09295	0.54017
mmu-miR-466i-3p	ATACACACACACATACACACTA	3.60639	4.35091	49	66	0.828882	0.323533
mmu-miR-466i-5p	TGTGTGTGTGTGTGTGTGTG	4.19519	4.74645	57	72	0.883859	0.491335
mmu-miR-466j	TGTGTGCATGTGCATGTGTGTAA	0	0.0659229	0	1		0.556537
mmu-miR-466k	TGTGTGTGTACATGTACATGTGA	3.82719	5.73529	52	87	0.667305	0.0201525
mmu-miR-466l-3p	TATAAATACATGCACACATATT	0.294399	0.725152	4	11	0.405983	0.121185
mmu-miR-466l-5p	TTGTGTGTACATGTACATGTAT	0.1472	0.131846	2	2		0.89704
mmu-miR-466m-3p	TACATACACACATACACACGCA	1.3248	0.395537	18	6	3.34936	0.0066382
mmu-miR-466m-5p	TGTGTGCATGTGCATGTGTGTAT	0.809598	1.12069	11	17	0.722411	0.413901
mmu-miR-466n-3p	TATACATGAGAGCATACATAGA	0.883198	1.12069	12	17	0.788085	0.542439
mmu-miR-466n-5p	GTGTGTGCGTACATGTACATGT	0.294399	0.593306	4	9		0.256423
mmu-miR-466o-3p	TACATACATGCACACATAAGAC	0.1472	0	2	0		0.210962
mmu-miR-466o-5p	TGATGTGTGTGTACATGTACAT	0.441599	1.58215	6	24	0.279113	0.00246005
mmu-miR-466p-3p	ATACATACACGCACACATAAGA	0	0	0	0		0.944977
mmu-miR-466p-5p	TATGTGTGTGTACATGTACAT	0	0	0	0		0.944977
mmu-miR-466q	GTGCACACACACACATACGT	0.515199	0.791075	7	12	0.651264	0.383688
mmu-miR-467a-3p	CATATACATACACACACCTACA	0.220799	0	3	0		0.0996771
mmu-miR-467a-5p	TAAGTGCCTGCATGTATATGCG	236.476	341.678	3213	5183	0.692102	9.45e-62
mmu-miR-467b-3p	ATATACATACACACACCAACAC	0.1472	0.197769	2	3		0.793289
mmu-miR-467b-5p	GTAAGTGCCTGCATGTATATG	1.104	2.83468	15	43	0.38946	0.000970351
mmu-miR-467c-3p	ATATACATACACACACCTATAC	0.662398	0.329614	9	5		0.21184
mmu-miR-467c-5p	TAAGTGCGTGCATGTATATGTG	21.1967	23.9959	288	364	0.883348	0.115997
mmu-miR-467d-3p	ATATACATACACACACCTACAC	19.9455	13.9097	271	211	1.43393	8.04e-05
mmu-miR-467d-5p	TAAGTGCGCGCATGTATATGCG	6.03518	4.87829	82	74	1.23715	0.183738
mmu-miR-467e-3p	ATATACATACACACACCTATAT	0.662398	1.38438	9	21	0.47848	0.0610897
mmu-miR-467e-5p	ATAAGTGTGAGCATGTATATGT	55.1999	47.3985	750	719	1.16459	0.00349786
mmu-miR-467f	ATATACACACACACACCTACA	0	0.0659229	0	1		0.556537
mmu-miR-467g	TATACATACACACACATATAT	0	0	0	0		0.944977
mmu-miR-467h	ATAAGTGTGTGCATGTATATGT	0.220799	0.0659229	3	1		0.31
mmu-miR-468-3p	TATGACTGATGTGCGTGTGTCTG	0	0	0	0		0.944977
mmu-miR-468-5p	GACTGATGTACTGATAAGAAACTCAGT	0	0	0	0		0.944977
mmu-miR-470-3p	AACCAGTACCTTTCTGAGAAGA	0	0	0	0		0.944977
mmu-miR-470-5p	TTCTTGGACTGGCACTGGTGAGT	0	0	0	0		0.944977
mmu-miR-471-3p	TGAAAGGTGCCATACTATGTAT	0	0	0	0		0.944977
mmu-miR-471-5p	TACGTAGTATAGTGCTTTTCAC	0	0	0	0		0.944977
mmu-miR-483-3p	TCACTCCTCCCCTCCCGTCTT	0	0	0	0		0.944977
mmu-miR-483-5p	AAGACGGGAGAAGAGAAGGGAG	0	0.131846	0	2		0.293579
mmu-miR-484	TCAGGCTCAGTCCCCTCCCGAT	382.645	340.426	5199	5164	1.12402	2.68e-09
mmu-miR-485-3p	AGTCATACACGGCTCTCCTCTC	0.809598	1.05477	11	16	0.767562	0.514729
mmu-miR-485-5p	AGAGGCTGGCCGTGATGAATTC	0.441599	1.38438	6	21	0.318987	0.00891504
mmu-miR-486a-3p	CGGGGCAGCTCAGTACAGGAT	36.2847	17.8651	493	271	2.03104	8.13e-22
mmu-miR-486b-3p	CGGGGCAGCTCAGTACAGGA	0	0	0	0		0.944977
mmu-miR-486b-5p	TCCTGTACTGAGCTGCCCCGAG	8530.07	5237.7	115898	79452	1.62859	0
mmu-miR-487b-3p	AATCGTACAGGGTCATCCACTT	0.515199	0.131846	7	2		0.0756975
mmu-miR-487b-5p	TGGTTATCCCTGTCCTCTTCG	0	0	0	0		0.944977
mmu-miR-488-3p	TTGAAAGGCTGTTTCTTGGTC	1.6928	1.97769	23	30	0.855947	0.58459
mmu-miR-488-5p	CCCAGATAATAGCACTCTCAA	0	0	0	0		0.944977
mmu-miR-489-3p	AATGACACCACATATATGGCAGC	0	0	0	0		0.944977
mmu-miR-489-5p	TGTCATATGTGTGATGACACTTTCT	0	0	0	0		0.944977
mmu-miR-490-3p	CAACCTGGAGGACTCCATGCTG	4.34239	1.58215	59	24	2.74461	1.22e-05
mmu-miR-490-5p	CCATGGATCTCCAGGTGGGT	0.441599	0.46146	6	7		0.955315
mmu-miR-491-3p	CTTATGCAAGATTCCCTTCTAC	0	0.131846	0	2		0.293579
mmu-miR-491-5p	AGTGGGGAACCCTTCCATGAGG	1.472	0.659229	20	10	2.23291	0.0345269
mmu-miR-493-3p	TGAAGGTCCTACTGTGTGCCAGG	0.367999	0.131846	5	2		0.222718
mmu-miR-493-5p	TTGTACATGGTAGGCTTTC	0	0	0	0		0.944977
mmu-miR-494-3p	TGAAACATACACGGGAAACCTC	4.56319	3.55984	62	54	1.28185	0.181485
mmu-miR-494-5p	AGGTTGTCCGTGTTGTCTTCTC	0	0	0	0		0.944977
mmu-miR-495-3p	AAACAAACATGGTGCACTTCTT	4.12159	6.19675	56	94	0.665121	0.0149331
mmu-miR-495-5p	GAAGTTGCCCATGTTATTTTTCG	0	0	0	0		0.944977
mmu-miR-496a-3p	TGAGTATTACATGGCCAATCTC	0.294399	0.131846	4	2		0.367896
mmu-miR-496a-5p	AGGTTGCCCATGGTGTGTTCA	0	0	0	0		0.944977
mmu-miR-496b	CAACATGGCCAATTCCTTTCAT	0	0	0	0		0.944977
mmu-miR-497a-3p	CAAACCACACTGTGGTGTTAG	0.0735998	0	1	0		0.446491
mmu-miR-497a-5p	CAGCAGCACACTGTGGTTTGTA	52.5503	26.501	714	402	1.98295	2.97e-29
mmu-miR-497b	CACCACAGTGTGGTTTGGACGTGG	5.15199	4.6146	70	70	1.11645	0.512458
mmu-miR-499-3p	GAACATCACAGCAAGTCTGTGCT	0.0735998	0	1	0		0.446491
mmu-miR-499-5p	TTAAGACTTGCAGTGATGTTT	27.9679	21.9523	380	333	1.27403	0.00123291
mmu-miR-500-3p	AATGCACCTGGGCAAGGGTTCA	15.088	11.6024	205	176	1.30041	0.0104387
mmu-miR-500-5p	AATCCTTGCTATCTGGGTGCTTAGT	0.735998	0.92292	10	14	0.797467	0.601964
mmu-miR-501-3p	AATGCACCCGGGCAAGGATTTG	125.929	103.235	1711	1566	1.21983	1.3e-08
mmu-miR-501-5p	AATCCTTTGTCCCTGGGTGAAA	1.98719	0.92292	27	14	2.15316	0.0175531
mmu-miR-503-3p	GAGTATTGTTTCCACTGCCTGG	22.9631	12.3276	312	187	1.86275	7.6e-12
mmu-miR-503-5p	TAGCAGCGGGAACAGTACTGCAG	52.6975	90.578	716	1374	0.581791	2.82e-33
mmu-miR-504-3p	AGGGAGAGCAGGGCAGGGTTTC	0	0	0	0		0.944977
mmu-miR-504-5p	AGACCCTGGTCTGCACTCTATC	9.05278	4.21906	123	64	2.14568	3.61e-07
mmu-miR-5046	AGCTCCCGCCACTGTGACCCCCTT	0	0	0	0		0.944977
mmu-miR-505-3p	CGTCAACACTTGCTGGTTTTCT	0.883198	1.18661	12	18	0.744302	0.441218
mmu-miR-505-5p	GGGAGCCAGGAAGTATTGATGTT	0.809598	0.527383	11	8	1.53512	0.358543
mmu-miR-509-3p	TGATTGACATTTCTGTAATGG	0	0	0	0		0.944977
mmu-miR-509-5p	TACTCCAGAATGTGGCAATCAT	0	0	0	0		0.944977
mmu-miR-5098	GTTACATGGTGAAGCCCAGTT	0	0	0	0		0.944977
mmu-miR-5099	TTAGATCGATGTGGTGCTCC	758.961	492.312	10312	7468	1.54163	3.19e-181
mmu-miR-5100	TCGAATCCCAGCGGTGCCTCT	0.662398	1.58215	9	24	0.41867	0.021839
mmu-miR-5101	TTTGTTTGTTTTGCTGATGCAG	0.1472	0	2	0		0.210962
mmu-miR-5103	TCATCCGGGATCCCCTGAGG	0.367999	1.38438	5	21	0.265822	0.00381251
mmu-miR-5104	CTGTGCTAGTGAGGTGGCTCAGCA	7.58078	5.4716	103	83	1.38548	0.0266271
mmu-miR-5106	AGGTCTGTAGCTCAGTTGGCAGA	0	0	0	0		0.944977
mmu-miR-5107-3p	CAACCTGTGCTTCTCTTCCCAG	8.02238	4.0213	109	61	1.99497	1.03e-05
mmu-miR-5107-5p	TGGGCAGAGGAGGCAGGGACA	7.13918	2.3073	97	35	3.09417	1.04e-09
mmu-miR-5108	GTAGAGCACTGGATGGTTT	0	0	0	0		0.944977
mmu-miR-511-3p	AATGTGTAGCAAAAGACAGGAT	22.1535	15.2282	301	231	1.45477	1.66e-05
mmu-miR-511-5p	ATGCCTTTTGCTCTGCACTCA	7.43358	4.15314	101	63	1.78987	0.00023685
mmu-miR-5110	GGAGGAGGTAGAGGGTGGTGGAATT	0	0	0	0		0.944977
mmu-miR-5112	TAGCTCAGCGGGAGAGCAC	0	0	0	0		0.944977
mmu-miR-5113	ACAGAGGAGGAGAGAGATCCTGT	6.03518	3.7576	82	57	1.60613	0.00562675
mmu-miR-5114	ACTGGAGACGGAAGCTGCAAGA	4.63679	5.60344	63	85	0.827489	0.257218
mmu-miR-5116	TTTGATAGGAACCCCGCCTGA	1.7664	1.38438	24	21	1.27595	0.41385
mmu-miR-5118	AAGGTTAGGCCAGCCTGGT	0	0	0	0		0.944977
mmu-miR-5119	CATCTCATCCTGGGGCTGG	0.1472	0.0659229	2	1		0.544816
mmu-miR-5120	TTTGGGGCTGTGGTGCCACCAGC	3.53279	1.64807	48	25	2.14359	0.00155122
mmu-miR-5121	AGCTTGTGATGAGACATCTCC	2.13439	1.12069	29	17	1.90454	0.0327811
mmu-miR-5122	CCGCGGGACCCGGGGCTGTG	0.809598	0.395537	11	6	2.04683	0.156784
mmu-miR-5123	TGTAGATCCATATGCCATGGTGTG	2.42879	1.91176	33	29	1.27045	0.34608
mmu-miR-5124a	GGTCCAGTGACTAAGAGCAT	0	0	0	0		0.944977
mmu-miR-5124b	TGGCTCAGTGACTAAGAAGCA	0	0	0	0		0.944977
mmu-miR-5125	TCTGCCTGGGATTTCCTTGT	0.220799	0.0659229	3	1		0.31
mmu-miR-5126	GCGGGCGGGGCCGGGGGCGGGG	0.735998	0.791075	10	12	0.930378	0.881563
mmu-miR-5127	TCTCCCAACCCTTTTCCCA	0	0	0	0		0.944977
mmu-miR-5128	CAATTGGGGCTGGCGAGATGGCT	1.5456	1.12069	21	17	1.37915	0.324327
mmu-miR-5129-3p	AATGTGCCTGTGCATCTCTTCC	10.1568	6.19675	138	94	1.63905	0.000191628
mmu-miR-5129-5p	ATGTGGGGGCATTGGTATTTTC	0.809598	0.46146	11	7	1.75443	0.246342
mmu-miR-5130	CTGGAGCGCGCGGGCGAGGCAGGC	0	0	0	0		0.944977
mmu-miR-5131	CGGCGCCCCACGGAGCCCCGAGC	0	0	0	0		0.944977
mmu-miR-5132-3p	CTGATGTTCCCCATCCCGCAG	0.294399	0.329614	4	5		0.892472
mmu-miR-5132-5p	GCGTGGGGTGGTGGACTCAGG	0.1472	0.197769	2	3		0.793289
mmu-miR-5133	GCTGGAGCTGCGGCAGCGCAG	0	0	0	0		0.944977
mmu-miR-5134-3p	ACGGGTGGCCCTCTTTCTGCAG	0.441599	0.725152	6	11	0.608974	0.344557
mmu-miR-5134-5p	TTGGCAGAAAGGGCAGCTGTG	0.0735998	0	1	0		0.446491
mmu-miR-5135	AGGTCTAGGTGGCAAGGGCGTCCT	0	0	0	0		0.944977
mmu-miR-5136	ATATGCGAGGGAACTACTGG	0	0.0659229	0	1		0.556537
mmu-miR-532-3p	CCTCCCACACCCAAGGCTTGCA	34.2239	31.9067	465	484	1.07263	0.279684
mmu-miR-532-5p	CATGCCTTGAGTGTAGGACCGT	1784.94	1873.07	24252	28413	0.952952	3.48e-08
mmu-miR-539-3p	CATACAAGGATAATTTCTTTTT	0	0	0	0		0.944977
mmu-miR-539-5p	GGAGAAATTATCCTTGGTGTGT	0	0.0659229	0	1		0.556537
mmu-miR-540-3p	AGGTCAGAGGTCGATCCTGG	0	0.131846	0	2		0.293579
mmu-miR-540-5p	CAAGGGTCACCCTCTGACTCTGT	0.220799	0.131846	3	2		0.58737
mmu-miR-541-3p	TGGCGAACACAGAATCCATACT	0	0.131846	0	2		0.293579
mmu-miR-541-5p	AAGGGATTCTGATGTTGGTCACACT	75.1454	67.8346	1021	1029	1.10777	0.0204832
mmu-miR-542-3p	TGTGACAGATTGATAACTGAAA	76.691	130.395	1042	1978	0.588142	1.35e-45
mmu-miR-542-5p	CTCGGGGATCATCATGTCACGA	1.3984	0.593306	19	9	2.35696	0.030237
mmu-miR-543-3p	AAACATTCGCGGTGCACTTCTT	1.5456	2.04361	21	31	0.756307	0.329926
mmu-miR-543-5p	AAGTTGCCCGCGTGTTTTTCG	0	0	0	0		0.944977
mmu-miR-544-3p	ATTCTGCATTTTTAGCAAGCTC	0	0	0	0		0.944977
mmu-miR-544-5p	TCTTGTTAAAAAGCAGAGTCT	0	0	0	0		0.944977
mmu-miR-546	ATGGTGGCACGGAGTC	0	0	0	0		0.944977
mmu-miR-547-3p	CTTGGTACATCTTTGAGTGAG	12.3648	4.28499	168	65	2.8856	1.61e-14
mmu-miR-547-5p	CACTTGAGGATGTACCACCCA	0.0735998	0	1	0		0.446491
mmu-miR-551b-3p	GCGACCCATACTTGGTTTCAG	0.220799	0.131846	3	2		0.58737
mmu-miR-551b-5p	GAAATCAAGCTTGGGTGAGACCT	0.0735998	0.131846	1	2		0.709718
mmu-miR-5615-3p	TGTCTCAGAAAACAACCAAGGA	0.0735998	0.395537	1	6		0.0979197
mmu-miR-5615-5p	CTTGGTTGTTTTCTGAGACAGA	0.735998	1.64807	10	25	0.446581	0.0274367
mmu-miR-5616-3p	AACTTGTGATGAGGTGAGACAG	0	0.0659229	0	1		0.556537
mmu-miR-5616-5p	TTTCCTCTCATCACAAGTTGA	0.0735998	0.131846	1	2		0.709718
mmu-miR-5617-3p	CAGGCGGCCTCAGCTCTCACT	0	0	0	0		0.944977
mmu-miR-5617-5p	GTAAGTGAGGGCAAGCCTTCTGG	0	0	0	0		0.944977
mmu-miR-5618-3p	CTATACCATGTAAAGGGT	0	0	0	0		0.944977
mmu-miR-5618-5p	TACCCTTTACACCGTGTAGT	0	0	0	0		0.944977
mmu-miR-5619-3p	CGAAAAGCTCATTGGTGATTTC	0.0735998	0.131846	1	2		0.709718
mmu-miR-5619-5p	AGTCACTAATGGCATTTTTGT	0	0.0659229	0	1		0.556537
mmu-miR-5620-3p	ACAGTCATCCCCCTGCCTCAC	0.0735998	0.131846	1	2		0.709718
mmu-miR-5620-5p	ACGAGGCAGGGGCTTTGACTGTG	2.50239	2.50507	34	38	0.998932	0.996717
mmu-miR-5621-3p	TGGGCCCTCCAGACCTCATGC	0.588798	0.395537	8	6		0.464972
mmu-miR-5621-5p	AGGAGGTCCTGGGGCCGCCCTGA	0	0	0	0		0.944977
mmu-miR-5622-3p	CTTAGCTGGGTAGTGGTGGTGC	0.1472	0.0659229	2	1		0.544816
mmu-miR-5622-5p	TTCACCACACCCAGCTTAAAGA	0.0735998	0.131846	1	2		0.709718
mmu-miR-5623-3p	GTTCTGGCTTTCAGCTGTCACC	0	0	0	0		0.944977
mmu-miR-5623-5p	TGGCAGCTGGCAAGTCAGAATGCA	0	0	0	0		0.944977
mmu-miR-5624-3p	TTAAGGCAGAGTTTACAATAGG	0	0.263692	0	4		0.0816938
mmu-miR-5624-5p	TATTGTAAACTCTGCCTT	0	0	0	0		0.944977
mmu-miR-5625-3p	CTGATTCAAGTGGTCTCTCGTGTCC	0	0.263692	0	4		0.0816938
mmu-miR-5625-5p	CCCGGAAGTTCTTGAGTAGGA	0	0	0	0		0.944977
mmu-miR-5626-3p	CAGCAGTTGAGTGATGTGACAC	0	0	0	0		0.944977
mmu-miR-5626-5p	GCCCCATCGATTAACTGCTTCC	0	0	0	0		0.944977
mmu-miR-5627-3p	ACAGGGCTCTCCGGCGCCCCTCGT	0.220799	0.0659229	3	1		0.31
mmu-miR-5627-5p	AGAGGGTGCGCCGGGCCCTGCG	0	0.0659229	0	1		0.556537
mmu-miR-568	ATGTATAAATGTATACACAC	0	0	0	0		0.944977
mmu-miR-5709-3p	AAAGTCTTAAGGGTGTGTATTG	0	0	0	0		0.944977
mmu-miR-5709-5p	ATACGCACACTTAAGACTTTAG	0.1472	0.46146	2	7		0.153696
mmu-miR-5710	TCTTGGGACATAGTGTAAGGCA	0	0	0	0		0.944977
mmu-miR-574-3p	CACGCTCATGCACACACCCACA	50.3423	23.8641	684	362	2.10954	3.81e-32
mmu-miR-574-5p	TGAGTGTGTGTGTGTGAGTGTGT	41.0687	42.5862	558	646	0.964367	0.531543
mmu-miR-582-3p	TAACCTGTTGAACAACTGAAC	55.1263	166.587	749	2527	0.330915	4.22e-183
mmu-miR-582-5p	ATACAGTTGTTCAACCAGTTAC	6.40318	10.0203	87	152	0.639023	0.000743462
mmu-miR-590-3p	TAATTTTATGTATAAGCTAGT	0	0	0	0		0.944977
mmu-miR-590-5p	GAGCTTATTCATAAAAGTGCAG	0	0	0	0		0.944977
mmu-miR-592-3p	TCATCACGTGGTGACGCAACAT	0	0	0	0		0.944977
mmu-miR-592-5p	ATTGTGTCAATATGCGATGATGT	1.3248	1.4503	18	22	0.913462	0.787493
mmu-miR-598-3p	TACGTCATCGTCGTCATCGTTA	14.0576	9.75659	191	148	1.44083	0.000808491
mmu-miR-598-5p	GCGGTGATGCCGATGGTGCGAGC	0	0	0	0		0.944977
mmu-miR-599	TTGTGTCAGTTTATCAAAC	0	0	0	0		0.944977
mmu-miR-615-3p	TCCGAGCCTGGGTCTCCCTCTT	1.1776	0.92292	16	14	1.27595	0.50453
mmu-miR-615-5p	GGGGGTCCCCGGTGCTCGGATC	0	0	0	0		0.944977
mmu-miR-6236	GCCGTCGCCGGCAGTCAGG	0	0.395537	0	6		0.0227328
mmu-miR-6237	TTAAGGATTGGGTCTTGGAATTC	0	0	0	0		0.944977
mmu-miR-6238	TTATTAGTCAGTGGAGGAAATG	0	0	0	0		0.944977
mmu-miR-6239	TAGCGTTGGATCACTCGGTG	0	0.0659229	0	1		0.556537
mmu-miR-6240	CCAAAGCATCGCGAAGGCCCACGGCG	1.1776	1.31846	16	20	0.893163	0.748991
mmu-miR-6241	CACGGCGGCTGGAATTCCC	0	0	0	0		0.944977
mmu-miR-6244	GGGGGCGTGGAATTATCGGGT	0	0	0	0		0.944977
mmu-miR-6335	CTGCATACACAGTGATATTCTG	0	0	0	0		0.944977
mmu-miR-6336	TCTCGGATTTAGTAAGAGATC	0	0	0	0		0.944977
mmu-miR-6337	TGAGGGCTGCTGGGTTGCTAGGT	0	0	0	0		0.944977
mmu-miR-6338	CTGGTTTCTCTCATTTGTGCT	0	0	0	0		0.944977
mmu-miR-6339	GATGCCTTTGTCCTCAGTGTTAG	0	0	0	0		0.944977
mmu-miR-6340	GTCAGCAGCAGCTTCGCTTTGGC	0	0	0	0		0.944977
mmu-miR-6341	CAGTGCAATGATATTGTCACTAT	0	0	0	0		0.944977
mmu-miR-6342	CAGCAGCAATCTGGTCTTTGAG	0	0	0	0		0.944977
mmu-miR-6343	TGTAAAGTAGGAGCTGACTGAC	0	0	0	0		0.944977
mmu-miR-6344	GTTTTCCTACTGTTTCCCTTTT	0	0	0	0		0.944977
mmu-miR-6345	TAGCACTGCTCAGGGTGAACT	0	0	0	0		0.944977
mmu-miR-6346	TAGCAGGTGTCTGCAATGCCAA	0	0	0	0		0.944977
mmu-miR-6347	CAGTGCGGCTGGCTGGAGATGC	0	0	0	0		0.944977
mmu-miR-6348	TCAGCCTTTATAAGGTGTGTGT	0	0	0	0		0.944977
mmu-miR-6349	TGGAATGTGGGAGGGGCATGCG	0	0	0	0		0.944977
mmu-miR-6350	TAGCAGGTGCATTATAAATAT	0	0	0	0		0.944977
mmu-miR-6351	TAGCGTTGCTCAGGGAGCACATG	0	0	0	0		0.944977
mmu-miR-6352	TTTGGGAAAAGGACCCCAGCTC	0	0	0	0		0.944977
mmu-miR-6353	TAGCAGCACGTATTTATCCTATT	0	0	0	0		0.944977
mmu-miR-6354	TGCCCTGGGGATCAGGTCTCT	0	0	0	0		0.944977
mmu-miR-6355	CACAATGCTCCAATGTGATAT	0	0	0	0		0.944977
mmu-miR-6356	TCCCCAGAGTCCTAACAATGA	0	0	0	0		0.944977
mmu-miR-6357	TAGCACTGCTCAGGGCTTTCAGG	0	0	0	0		0.944977
mmu-miR-6358	CAGTGTGGCAGTATACAGCTATA	0	0	0	0		0.944977
mmu-miR-6359	CGATGTTGCCCAGGGTCAGAA	0	0	0	0		0.944977
mmu-miR-6360	TAGTGTTGCTCAGGCAGCAGGA	0	0	0	0		0.944977
mmu-miR-6361	TGGCTCAGCAGTCACCCTGTGAC	0	0	0	0		0.944977
mmu-miR-6362	GTGGGCATCTAGGCTAGTTCTG	0	0	0	0		0.944977
mmu-miR-6363	TGTAGACTGGACTGTCCTCAAA	0	0	0	0		0.944977
mmu-miR-6364	TCGATCCCCAGCACTCCTGTGA	0	0	0	0		0.944977
mmu-miR-6365	TTAGCCTTTAATATATTTGTTG	0	0	0	0		0.944977
mmu-miR-6366	AGCTAAGGGGCCCGGGGAGCCA	0	0	0	0		0.944977
mmu-miR-6367	TCCCTGAGACCCTGGTTCAGGA	0	0	0	0		0.944977
mmu-miR-6368	CTGGGAAGCAGTGGAGGGGAG	0	0	0	0		0.944977
mmu-miR-6369	TGGCTCAGTTCAGTGTTGGTGAG	0	0	0	0		0.944977
mmu-miR-6370	GCAGGAACAGCAAAGGGGAAG	0	0	0	0		0.944977
mmu-miR-6371	TTCAAGTGGCTTGAAGCTCTTCT	0	0	0	0		0.944977
mmu-miR-6372	AGAACTGGGGAAACTTCCAGCCT	0	0	0	0		0.944977
mmu-miR-6373	TATGGGAATATCTAGGAGGTGA	0	0	0	0		0.944977
mmu-miR-6374	AAGTTATAAGCTAGTTGGTGCT	0	0	0	0		0.944977
mmu-miR-6375	GAATTGGCTGACTGTATTCCAAA	0	0	0	0		0.944977
mmu-miR-6376	CAGTGTGGCCAATTGGAGATTA	0	0	0	0		0.944977
mmu-miR-6377	TCATTTGTCTTCGTGTCTGCATC	0	0	0	0		0.944977
mmu-miR-6378	TGGTTCACGGGAGGACACACGC	0	0	0	0		0.944977
mmu-miR-6379	TCCCTGGAGTTTTACAGCTAGA	0	0	0	0		0.944977
mmu-miR-6380	TGTAAGTGCTTTTAACTGCTGAGC	0.1472	0.0659229	2	1		0.544816
mmu-miR-6381	CAGGATGCTGGTGACATGAGT	0	0	0	0		0.944977
mmu-miR-6382	TGGAATGTAAAGAGAGCACACAAG	0	0	0	0		0.944977
mmu-miR-6383	TAAAGTGCTGTGTCACGGACA	0	0	0	0		0.944977
mmu-miR-6384	GCTTTCCTACTGTTTCCCTG	0	0	0	0		0.944977
mmu-miR-6385	GCAAGGATGACAGAGAGGAAG	0	0	0	0		0.944977
mmu-miR-6386	CATGCCTTAGGGTGGGATGCAAGT	0	0	0	0		0.944977
mmu-miR-6387	TGGAATGGCTTCCCTTGTGTAT	0	0	0	0		0.944977
mmu-miR-6388	TGCAGATGGCACAGTGAGGCC	0	0	0	0		0.944977
mmu-miR-6389	CAGTGCAATGTTAAACTTTGC	0	0	0	0		0.944977
mmu-miR-6390	GAATTGATCAGGATGTAACCA	0	0	0	0		0.944977
mmu-miR-6391	TGAGGCACGGGAGGACAATGT	0	0	0	0		0.944977
mmu-miR-6392-3p	GACGCAGGTTTGCCGGGTCCTCT	0	0	0	0		0.944977
mmu-miR-6392-5p	TCTGGCGCCCTGGTCCTGTCAGC	0	0	0	0		0.944977
mmu-miR-6393	CTGCCCACGAAGCACACTGAGT	0	0	0	0		0.944977
mmu-miR-6394	TCCCTGAGTGGGGCCAGGTCT	0	0	0	0		0.944977
mmu-miR-6395	CTGGCCCTCTCTGCCCTGTTTA	0	0.131846	0	2		0.293579
mmu-miR-6396	GGGGCCTTAGCTCCTAGTCCTGGA	0	0	0	0		0.944977
mmu-miR-6397	TGGAGACTTTCAGTGGAGTGA	0	0	0	0		0.944977
mmu-miR-6398	GTCAATGAACCTCAGGTAAGG	0	0	0	0		0.944977
mmu-miR-6399	TTGCAATGATGGTATTCTGAGG	1.104	1.91176	15	29	0.577476	0.0831886
mmu-miR-6400	TTCTTGCTGCTTGGTGCTCGC	0	0	0	0		0.944977
mmu-miR-6401	TTACACTCCAGTGGTGTCGGGT	0	0	0	0		0.944977
mmu-miR-6402	GAGCAGTTTTCCCAGGAACCCGC	0.1472	0.197769	2	3		0.793289
mmu-miR-6403	GCAAAGGCGCTGTTTCCCAGTG	0	0	0	0		0.944977
mmu-miR-6404	GTGGGAAGTGACAAGGGGTAG	0	0	0	0		0.944977
mmu-miR-6405	GTGGGAAGCAGTGGGAAGCAGTG	0	0	0	0		0.944977
mmu-miR-6406	CGCGACCTCAGGCTGACTCATG	0	0	0	0		0.944977
mmu-miR-6407	TGGCTGTCCCTGACAGGGCAAGT	0	0	0	0		0.944977
mmu-miR-6408	CACATGGGCTTGCATGGGATGGTC	0	0	0	0		0.944977
mmu-miR-6409	TGCGGGTGAGGATGTGTGCTCCT	0	0	0	0		0.944977
mmu-miR-6410	TGGCTCAGGGACTACTCTGTGC	0	0	0	0		0.944977
mmu-miR-6411	TAGCATGTGTAGTACATAATG	0	0	0	0		0.944977
mmu-miR-6412	TCGAAACCATCCTCAGCTACTA	0	0	0	0		0.944977
mmu-miR-6413	TGGCTCAGAAGAGCAGGTAGT	0	0	0	0		0.944977
mmu-miR-6414	CTAAGTTCTGAGCTGAGTCTTG	0	0	0	0		0.944977
mmu-miR-6415	GAGCTTTTGAGGGCCCCATGCA	0	0	0	0		0.944977
mmu-miR-6416-3p	GCAAAGAGCAGCAAAAGGAAG	0	0	0	0		0.944977
mmu-miR-6416-5p	CTCCGTATCATCTGCTCTTCT	0	0	0	0		0.944977
mmu-miR-6417	TAGCAAACGACAGCTAGCCACA	0	0	0	0		0.944977
mmu-miR-6418-3p	ACTGCAACCTCCTTTCTCCAGG	0.809598	1.25253	11	19	0.646368	0.256834
mmu-miR-6418-5p	TCAGGGGAAGGGAAGAGATGC	0	0	0	0		0.944977
mmu-miR-6419	CAGCAGCAATCTGACACATGGA	0	0	0	0		0.944977
mmu-miR-6420	ACTAATCCTATAAAATCAAAC	0	0	0	0		0.944977
mmu-miR-6481	CACTGAAAATGCTTAGATG	0	0	0	0		0.944977
mmu-miR-6516-3p	TCATGTATGATACTGCAAACAG	0.294399	0.131846	4	2		0.367896
mmu-miR-6516-5p	TTTGCAGTAACAGGTGTGGACA	2.79679	1.77992	38	27	1.5713	0.0712686
mmu-miR-652-3p	AATGGCGCCACTAGGGTTGTG	1097.96	934.918	14918	14182	1.17439	8.99e-43
mmu-miR-652-5p	CAACCCTAGGAGGGGGTGCCATTC	6.91838	11.4047	94	173	0.606628	7.31e-05
mmu-miR-653-3p	TTCACTGGAGTTTGTTTCAGT	0	0	0	0		0.944977
mmu-miR-653-5p	GTGTTGAAACAATCTCTACTG	0	0	0	0		0.944977
mmu-miR-6537-3p	TTATCAGGTGGAAGAACTCAGCT	1.84	3.23022	25	49	0.569619	0.0203931
mmu-miR-6537-5p	GTGAGTTTCTCCCACTGGTGAC	0	0	0	0		0.944977
mmu-miR-6538	CGCGGGCTCCGGGGCGGCG	0.515199	0.725152	7	11	0.71047	0.499905
mmu-miR-6539	GCACAGTGATGAACTCTGAGGGCT	12.8064	13.1846	174	200	0.971314	0.782081
mmu-miR-654-3p	TATGTCTGCTGACCATCACCTT	0	0	0	0		0.944977
mmu-miR-654-5p	TGGTAAGCTGCAGAACATGTGT	0	0	0	0		0.944977
mmu-miR-6540-3p	TCTGAAGCTTGCTTACCTCCA	0	0	0	0		0.944977
mmu-miR-6540-5p	CTAAGGCAGGCAGACTTCAGTG	0	0.329614	0	5		0.0430944
mmu-miR-6541	CACAGGCAAGGACTTCTCAAG	0	0.0659229	0	1		0.556537
mmu-miR-6546-3p	GAGCGAAGCCCAAGCGCCAGA	0.0735998	0.131846	1	2		0.709718
mmu-miR-6546-5p	AGGCGCCTCTGAGCTTGTGCTTGT	1.5456	1.77992	21	27	0.868353	0.638365
mmu-miR-664-3p	TATTCATTTACTCCCCAGCCTA	21.0495	10.7454	286	163	1.95893	2.61e-12
mmu-miR-664-5p	CTGGCTGGGGAAAATGACTGG	14.6464	9.95435	199	151	1.47135	0.000322082
mmu-miR-665-3p	ACCAGGAGGCTGAGGTCCCT	0.220799	0.0659229	3	1		0.31
mmu-miR-665-5p	AGGGGCCTCTGCCTCTATCCAGGATT	0	0	0	0		0.944977
mmu-miR-666-3p	GGCTGCAGCGTGATCGCCTGCT	0	0	0	0		0.944977
mmu-miR-666-5p	AGCGGGCACAGCTGTGAGAGCC	0.294399	0.46146	4	7		0.502711
mmu-miR-667-3p	TGACACCTGCCACCCAGCCCAAG	0.956798	0.329614	13	5	2.90278	0.0361522
mmu-miR-667-5p	CGGTGCTGGTGGAGCAGTGAGCACG	0.367999	0.395537	5	6		0.926681
mmu-miR-668-3p	TGTCACTCGGCTCGGCCCACTACC	1.104	0.131846	15	2	8.3734	0.000583461
mmu-miR-668-5p	GTAAGTGTGCCTCGGGTGAGCATG	0	0	0	0		0.944977
mmu-miR-669a-3-3p	ACATAACATACACACACATGTAT	1.2512	0.92292	17	14	1.35569	0.399163
mmu-miR-669b-3p	CATATACATACACACAAACATAT	1.6928	1.4503	23	22	1.1672	0.601186
mmu-miR-669b-5p	AGTTTTGTGTGCATGTGCATGT	3.75359	6.26267	51	95	0.599359	0.00276965
mmu-miR-669c-3p	TACACACACACACACAAGTAAA	0	0.0659229	0	1		0.556537
mmu-miR-669c-5p	ATAGTTGTGTGTGGATGTGTGT	114.742	116.42	1559	1766	0.985589	0.677112
mmu-miR-669d-2-3p	ATATACATACACACCCATATAC	0	0.0659229	0	1		0.556537
mmu-miR-669d-3p	TATACATACACACCCATATAC	0	0	0	0		0.944977
mmu-miR-669d-5p	ACTTGTGTGTGCATGTATATGT	5.96158	8.89959	81	135	0.669872	0.00401768
mmu-miR-669e-3p	TGAATATACACACACTTACAC	0.735998	0.593306	10	9	1.2405	0.636916
mmu-miR-669e-5p	TGTCTTGTGTGTGCATGTTCAT	3.31199	5.60344	45	85	0.591063	0.00379058
mmu-miR-669f-3p	CATATACATACACACACACGTAT	6.84478	5.99898	93	91	1.14099	0.36973
mmu-miR-669f-5p	AGTTGTGTGTGCATGTGCATGTGT	2.28159	3.23022	31	49	0.706328	0.130607
mmu-miR-669g	TGCATTGTATGTGTTGACATGAT	0	0	0	0		0.944977
mmu-miR-669h-3p	TATGCATATACACACATGCACA	0	0	0	0		0.944977
mmu-miR-669h-5p	ATGCATGGGTGTATAGTTGAGTGC	1.3248	0.593306	18	9	2.23291	0.0452362
mmu-miR-669i	TGCATATACACACATGCATAC	0	0.0659229	0	1		0.556537
mmu-miR-669j	TGCATATACTCACATGCAAACA	0	0	0	0		0.944977
mmu-miR-669k-3p	TATGCATATACACGCATGCAA	0	0	0	0		0.944977
mmu-miR-669k-5p	TGTGCATGTGTGTATAGTTGTGTGC	0.515199	0.659229	7	10	0.781517	0.63905
mmu-miR-669l-3p	ATATACATACACACCCATATAT	0.220799	0	3	0		0.0996771
mmu-miR-669l-5p	AGTTGTGTGTGCATGTATATGT	6.03518	6.85598	82	104	0.88028	0.391328
mmu-miR-669m-3p	ATATACATCCACACAAACATAT	0.441599	1.05477	6	16	0.41867	0.0643356
mmu-miR-669n	ATTTGTGTGTGGATGTGTGT	0	0	0	0		0.944977
mmu-miR-669o-3p	ACATAACATACACACACACGTAT	84.5662	59.9898	1149	910	1.40968	7.88e-15
mmu-miR-669o-5p	TAGTTGTGTGTGCATGTTTATGT	17.2224	16.6785	234	253	1.03261	0.721379
mmu-miR-669p-3p	CATAACATACACACACACACGTAT	0.883198	1.25253	12	19	0.705128	0.354099
mmu-miR-669p-5p	AGTTGTGTGTGCATGTTCATGTCT	71.6126	103.763	973	1574	0.690158	3.63e-20
mmu-miR-670-3p	TTTCCTCATATCCATTCAGGAGTGT	0.0735998	0.0659229	1	1		0.917549
mmu-miR-670-5p	ATCCCTGAGTGTATGTGGTGAA	0	0	0	0		0.944977
mmu-miR-671-3p	TCCGGTTCTCAGGGCTCCACC	27.1583	26.8306	369	407	1.01221	0.863922
mmu-miR-671-5p	AGGAAGCCCTGGAGGGGCTGGAG	16.6336	19.645	226	298	0.846706	0.0591215
mmu-miR-6715-3p	CCAAACCAGGCGTGCCTGTGG	0	0	0	0		0.944977
mmu-miR-6715-5p	ACAGGCACCACAGGTTTGAGCAT	0	0	0	0		0.944977
mmu-miR-672-3p	ACACACAGTCACTATCTTCGA	0.0735998	0	1	0		0.446491
mmu-miR-672-5p	TGAGGTTGGTGTACTGTGTGTGA	2.87039	1.91176	39	29	1.50144	0.0963017
mmu-miR-673-3p	TCCGGGGCTGAGTTCTGTGCACC	0.662398	0.197769	9	3		0.0597474
mmu-miR-673-5p	CTCACAGCTCTGGTCCTTGGAG	0.220799	0.197769	3	3		0.880001
mmu-miR-674-3p	CACAGCTCCCATCTCAGAACAA	77.2062	67.3073	1049	1021	1.14707	0.00179891
mmu-miR-674-5p	GCACTGAGATGGGAGTGGTGTA	24.5087	23.6004	333	358	1.03849	0.618272
mmu-miR-675-3p	CTGTATGCCCTAACCGCTCAGT	0	0	0	0		0.944977
mmu-miR-675-5p	TGGTGCGGAAAGGGCCCACAGT	0	0	0	0		0.944977
mmu-miR-676-3p	CCGTCCTGAGGTTGTTGAGCT	39.5231	14.8326	537	225	2.6646	1.96e-38
mmu-miR-676-5p	ACTCTACAACCTTAGGACTTGC	22.5951	13.3164	307	202	1.69679	3.5e-09
mmu-miR-6769b-3p	CATCTTCCCTGTCCCACCCAG	0	0	0	0		0.944977
mmu-miR-6769b-5p	CCTGGTGGGTGGGGAAGAGC	0	0	0	0		0.944977
mmu-miR-677-3p	GAAGCCAGATGCCGTTCCTGAGAAGG	0	0	0	0		0.944977
mmu-miR-677-5p	TTCAGTGATGATTAGCTTCTGA	2.06079	3.1643	28	48	0.651264	0.0705499
mmu-miR-678	GTCTCGGTGCAAGGACTGGAGG	0	0	0	0		0.944977
mmu-miR-679-3p	AGCAAGGTCCTCCTCACAGTAG	0	0	0	0		0.944977
mmu-miR-679-5p	GGACTGTGAGGTGACTCTTGGT	0.588798	0.725152	8	11	0.811966	0.674231
mmu-miR-680	GGGCATCTGCTGACATGGGGG	0	0	0	0		0.944977
mmu-miR-681	CAGCCTCGCTGGCAGGCAGCT	0	0	0	0		0.944977
mmu-miR-682	CTGCAGTCACAGTGAAGTCTG	0	0	0	0		0.944977
mmu-miR-683	CCTGCTGTAAGCTGTGTCCTC	0	0	0	0		0.944977
mmu-miR-684	AGTTTTCCCTTCAAGTCAA	0	0	0	0		0.944977
mmu-miR-686	ATTGCTTCCCAGACGGTGAAGA	0	0	0	0		0.944977
mmu-miR-687	CTATCCTGGAATGCAGCAATGA	0	0	0	0		0.944977
mmu-miR-688	TCGCAGGCGACTACTTATTC	0	0	0	0		0.944977
mmu-miR-6896-3p	TTTCTCTCTCTCACCTACAAAC	0	0	0	0		0.944977
mmu-miR-6896-5p	TTTGTAGGCGACGAGAACCCGT	0.220799	0.131846	3	2		0.58737
mmu-miR-6897-3p	CGGTCTGTGTTCTTCCCCCAG	0	0.0659229	0	1		0.556537
mmu-miR-6897-5p	TGGGGGCAGTGTCACACGCTGTT	0.294399	0.131846	4	2		0.367896
mmu-miR-6898-3p	AAGTCTCTTTGTACCTTCTCT	0	0	0	0		0.944977
mmu-miR-6898-5p	TGTAAGGGGAGATGCAGGGAGC	0	0	0	0		0.944977
mmu-miR-6899-3p	TTGTCCTTCTGTGTCTTCTGCAG	2.87039	2.57099	39	39	1.11645	0.623444
mmu-miR-6899-5p	AGCAGAACGCAGCGGGCATGA	0	0	0	0		0.944977
mmu-miR-690	AAAGGCTAGGCTCACAACCAAA	4.63679	7.18559	63	109	0.645289	0.00516336
mmu-miR-6900-3p	TGGTGATGGGCTCTCTTGTAG	0.294399	0.131846	4	2		0.367896
mmu-miR-6900-5p	TGCCAGGAGAAGCCTAGAGCCGTC	0	0	0	0		0.944977
mmu-miR-6901-3p	GACCTTCTGTGTTCTTGCAG	0.1472	0	2	0		0.210962
mmu-miR-6901-5p	TGCAGGAATGCAGAGGACCT	0.0735998	0	1	0		0.446491
mmu-miR-6902-3p	CCATGTGATGTGTGGGTTCAG	0	0.329614	0	5		0.0430944
mmu-miR-6902-5p	TTCCTCACATTGTCACATGAAG	0.1472	0.0659229	2	1		0.544816
mmu-miR-6903-3p	TGTGTGTCTGTTTTTCCCAG	0.1472	0.0659229	2	1		0.544816
mmu-miR-6903-5p	TTGGGAAAAGCAGTACTTACCA	0	0	0	0		0.944977
mmu-miR-6904-3p	TCTGATCTCTTACCCCAG	0	0	0	0		0.944977
mmu-miR-6904-5p	TCCTGGGGTTAGAGTTGAGTGG	0.0735998	0	1	0		0.446491
mmu-miR-6905-3p	AAATAACCTTATCTGCCCGAT	0	0	0	0		0.944977
mmu-miR-6905-5p	ACTGGGCAGGTTGGGTTGAATGA	0	0	0	0		0.944977
mmu-miR-6906-3p	GAATTCCGGTCTCCTCTCCAG	0	0	0	0		0.944977
mmu-miR-6906-5p	ATGGATGGGCAGACGGACAGACAG	0	0	0	0		0.944977
mmu-miR-6907-3p	AACGTGCGTTTCTTTTGTGTCCT	0	0	0	0		0.944977
mmu-miR-6907-5p	TTCTGGGACACAGGGAGGCTCG	0	0	0	0		0.944977
mmu-miR-6908-3p	ACACTCTCCCTTGTGCTGGCAG	0	0	0	0		0.944977
mmu-miR-6908-5p	TTGCCTGTCAGGGAGAGCCCCA	0	0	0	0		0.944977
mmu-miR-6909-3p	TGCCTTCCCCGGCCTCCCACAG	0.220799	0	3	0		0.0996771
mmu-miR-6909-5p	CAGGGGGGCTGGAATGGGCACT	0.0735998	0	1	0		0.446491
mmu-miR-691	ATTCCTGAAGAGAGGCAGAAAA	0	0	0	0		0.944977
mmu-miR-6910-3p	TCATGGTTTCCACCCTTTGTCC	0	0.131846	0	2		0.293579
mmu-miR-6910-5p	TGGGGGTAGGGCACCAGTGGGCA	0	0	0	0		0.944977
mmu-miR-6911-3p	TCAATCACACTCTGTCCACAG	3.97439	1.71399	54	26	2.31879	0.000280175
mmu-miR-6911-5p	TGGGCTGAGTGGGTCTGTGGCAT	0.1472	0	2	0		0.210962
mmu-miR-6912-3p	CTACCTGAGGGTCTCCTTCCTGCAG	0.0735998	0	1	0		0.446491
mmu-miR-6912-5p	TACAGGGAGGGTGCTCAGGCAG	0	0	0	0		0.944977
mmu-miR-6913-3p	TCTCTACTGATTTGTCTCCTCAG	0.1472	0.131846	2	2		0.89704
mmu-miR-6913-5p	TGGGAGACCAGTCAGGTGTTGG	0	0	0	0		0.944977
mmu-miR-6914-3p	TCTGTCCACCTCTTCCCAG	0.0735998	0.131846	1	2		0.709718
mmu-miR-6914-5p	TCCTGGGGTGGTGGTGGCCACAGA	0	0.0659229	0	1		0.556537
mmu-miR-6915-3p	CAACTTCCTTCCTCGTGCCCAG	0.294399	0.0659229	4	1		0.171315
mmu-miR-6915-5p	AGGTCAGAGCAGATGGAGGTTCGT	0.0735998	0	1	0		0.446491
mmu-miR-6916-3p	CTTGGTCTCCCTCTTCCTACAG	0.0735998	0.131846	1	2		0.709718
mmu-miR-6916-5p	CAGGAGGATGGAGATGAGTCA	0.1472	0.131846	2	2		0.89704
mmu-miR-6917-3p	GTCACTTCTCTTCCCACCACAG	0	0	0	0		0.944977
mmu-miR-6917-5p	TGTGGAAGGGGAGTTGTGCCG	0	0	0	0		0.944977
mmu-miR-6918-3p	TGAGCCTGTGCCCTTCTCACAG	0	0	0	0		0.944977
mmu-miR-6918-5p	TGCTGAGGACGGGATTAGGTTCT	0.1472	0	2	0		0.210962
mmu-miR-6919-3p	GCTCCTCCTCCTGGCCCACAG	0	0	0	0		0.944977
mmu-miR-6919-5p	TAGGCCACTGGAGGTGGAATTGT	0	0	0	0		0.944977
mmu-miR-692	ATCTCTTTGAGCGCCTCACTC	0	0	0	0		0.944977
mmu-miR-6920-3p	CACTGCCCTTTTCCATTGCCT	0	0	0	0		0.944977
mmu-miR-6920-5p	ACACAATGGAAAGACTGCTTGT	0	0	0	0		0.944977
mmu-miR-6921-3p	TGACTACTCCTTGCCTCTCAG	0.0735998	0	1	0		0.446491
mmu-miR-6921-5p	TGAGGGGCATGAGGTAGGAAGC	0	0	0	0		0.944977
mmu-miR-6922-3p	TGTTCTGCTCACCCTTCTCACAG	0.0735998	0.263692	1	4		0.274691
mmu-miR-6922-5p	TGTGGGAGGGGACTGTAGAGAGG	0.294399	0	4	0		0.0470963
mmu-miR-6923-3p	ACACTCCCTCCTCCTCCCCAG	0	0	0	0		0.944977
mmu-miR-6923-5p	GTGAGGGCAGGAGGATTGGGGTGT	0	0	0	0		0.944977
mmu-miR-6924-3p	TCCTTAATCCCCACCCTTCAG	0.0735998	0	1	0		0.446491
mmu-miR-6924-5p	AGAGGATGGGGATTTGGCGAAGT	0	0.131846	0	2		0.293579
mmu-miR-6925-3p	TCCCCTTTTATCCCTCAG	0	0	0	0		0.944977
mmu-miR-6925-5p	TGAGGAAGAGAAGGCTTGGACT	0	0	0	0		0.944977
mmu-miR-6926-3p	TCACCATCCCTGTCTCCATAG	0	0	0	0		0.944977
mmu-miR-6926-5p	TCAGTGGGGTGAGGGATGGTGA	0	0	0	0		0.944977
mmu-miR-6927-3p	CCTGAGCTGGCTCCCCTGCAG	0	0.0659229	0	1		0.556537
mmu-miR-6927-5p	GTGAGGGGATCCAGCCCAGGCT	0	0	0	0		0.944977
mmu-miR-6928-3p	AAGCTGTTCCTGTACTCTCCAG	0.220799	0.197769	3	3		0.880001
mmu-miR-6928-5p	AGGGGATTTGCATGGACTGCACT	0	0	0	0		0.944977
mmu-miR-6929-3p	CAGGTGCTGTCTTCTTCTTCCAG	0	0.0659229	0	1		0.556537
mmu-miR-6929-5p	AGGGAGGAGCAGCATCTGTGA	0.0735998	0	1	0		0.446491
mmu-miR-693-3p	GCAGCTTTCAGATGTGGCTGTAA	0	0.131846	0	2		0.293579
mmu-miR-693-5p	CAGCCACATCCGAAAGTTTTC	0	0.0659229	0	1		0.556537
mmu-miR-6930-3p	CTGGCCTCTCCATACTCCCAG	0	0	0	0		0.944977
mmu-miR-6930-5p	AAGGGGGTGCTTGAGAGGTTTGG	0	0	0	0		0.944977
mmu-miR-6931-3p	CCCAACCTCTTCATACCCCAG	0	0	0	0		0.944977
mmu-miR-6931-5p	TGGGGTGGGGAGTGGGGGACT	0	0	0	0		0.944977
mmu-miR-6932-3p	TCTGTTCTGCTTCCTCTGCAG	0.367999	0.263692	5	4		0.622746
mmu-miR-6932-5p	TTGTAGGTGAAGTAGACTTGGC	0.0735998	0.329614	1	5		0.165264
mmu-miR-6933-3p	AGGTGTTTCCTCTGCCGTCA	0	0	0	0		0.944977
mmu-miR-6933-5p	TGGCGGCAGTCAGGATACCTGT	1.2512	1.18661	17	18	1.05443	0.867881
mmu-miR-6934-3p	ACCTCTGCTCCTGCCCCACCAG	0	0	0	0		0.944977
mmu-miR-6934-5p	TTGGTGGAGACAGCAAGGGTGG	0	0	0	0		0.944977
mmu-miR-6935-3p	TGTTCTTTGTCTTTCCACAG	0	0	0	0		0.944977
mmu-miR-6935-5p	TGTGGGAGGCTCAGGGCCCCTG	0	0.0659229	0	1		0.556537
mmu-miR-6936-3p	CGGCGCGCGCGGTCGCTCACC	0.0735998	0.0659229	1	1		0.917549
mmu-miR-6936-5p	GTGAGCCACTGCCGTGCCCGC	0	0.263692	0	4		0.0816938
mmu-miR-6937-3p	TCACAGGTTCCCCCTTGCACTAG	0	0	0	0		0.944977
mmu-miR-6937-5p	TAGCTGTAAGGGCTGGGTCTGTGT	0	0.197769	0	3		0.154866
mmu-miR-6938-3p	TCATCTGGGGCTGTCTCCTTAG	0	0	0	0		0.944977
mmu-miR-6938-5p	TTGGAGCTAGCTCCAGAGAGAGT	0	0	0	0		0.944977
mmu-miR-6939-3p	CCTCACTTGACCCGCTGCAG	0.294399	0.197769	4	3		0.60986
mmu-miR-6939-5p	CAGGCAGCTGGTTGGTGGAAG	0	0	0	0		0.944977
mmu-miR-694	CTGAAAATGTTGCCTGAAG	0.0735998	0.0659229	1	1		0.917549
mmu-miR-6940-3p	TTACCTTCCGTGCTTGCCCGCAG	0.0735998	0	1	0		0.446491
mmu-miR-6940-5p	AGGGCTGGCTGGAAGGTTTTTCG	0	0	0	0		0.944977
mmu-miR-6941-3p	CTAACTCGGCTGCTCCCAAAG	0	0	0	0		0.944977
mmu-miR-6941-5p	CTGGGGGACTGACGGGTAGCT	0	0	0	0		0.944977
mmu-miR-6942-3p	TTATGGTTCTCTCCACCTCTCA	0	0	0	0		0.944977
mmu-miR-6942-5p	TAGGAGGAGGGGAACATTTGC	0.0735998	0.131846	1	2		0.709718
mmu-miR-6943-3p	CTGCTTCCATACCCCTACCCAG	1.9136	0.725152	26	11	2.63889	0.00512938
mmu-miR-6943-5p	TGGGGTGAGGTTGGAAGCTA	0	0	0	0		0.944977
mmu-miR-6944-3p	TAACTCTTCCCTTGTGCCCTCAG	0.294399	0.329614	4	5		0.892472
mmu-miR-6944-5p	GTGAGAGCGGGGGGAGTGGCAAG	0	0	0	0		0.944977
mmu-miR-6945-3p	TCTGAGCTCTGCCCTTCCCAT	0.662398	0.46146	9	7		0.475651
mmu-miR-6945-5p	TCCTGGGAGGGGCAGCCCCTGG	0	0	0	0		0.944977
mmu-miR-6946-3p	TTTCTTCTCTTCCCTTTCAG	2.57599	1.71399	35	26	1.50292	0.114496
mmu-miR-6946-5p	AAAAGGGAGAGAAAGAAATGC	0	0.197769	0	3		0.154866
mmu-miR-6947-3p	GCAGCCTCTTTCCCTGGCATCA	0.1472	0	2	0		0.210962
mmu-miR-6947-5p	CATCCAGTGGAGAGGCTCGTG	0.0735998	0.0659229	1	1		0.917549
mmu-miR-6948-3p	TGTCCTTCCTGTCTGACCACA	0.441599	0.197769	6	3		0.2609
mmu-miR-6948-5p	AGTTCAGACAGGACTGTGACAC	0.735998	0.791075	10	12	0.930378	0.881563
mmu-miR-6949-3p	TTCCCCTTTTTCTATCCACAG	0	0	0	0		0.944977
mmu-miR-6949-5p	AAAGTGGGTCTAGAAAGAGGTGA	0	0	0	0		0.944977
mmu-miR-695	AGATTGGGCATAGGTGACTGAA	0	0	0	0		0.944977
mmu-miR-6950-3p	CTCTGTCTTGATCCTCTCCAG	0	0	0	0		0.944977
mmu-miR-6950-5p	TCCTGGAGTGGAGGACAGTCAGA	0	0	0	0		0.944977
mmu-miR-6951-3p	CTTTTTTCTTCACAAATACAG	0	0	0	0		0.944977
mmu-miR-6951-5p	TTGTATTTGTGTGATTAAAGT	0	0.0659229	0	1		0.556537
mmu-miR-6952-3p	TCTCTGACTCTGCCTCCCACAG	1.2512	1.77992	17	27	0.702952	0.260786
mmu-miR-6952-5p	ATGGTGGGCGGTGAAACAGAGA	0.1472	0	2	0		0.210962
mmu-miR-6953-3p	CTGACCCAGCCTCTATGTCCCCAG	0.1472	0.0659229	2	1		0.544816
mmu-miR-6953-5p	AAGGGGCAGGGGCAGGGATTCAAGTG	0	0	0	0		0.944977
mmu-miR-6954-3p	TGCAGCCAGCTCTTCCCCTAG	1.6192	0.791075	22	12	2.04683	0.0429534
mmu-miR-6954-5p	TGGGGCAGTTCTGGGGGCAGAT	0.0735998	0	1	0		0.446491
mmu-miR-6955-3p	ACACCTGTCTCCTTTGCCCACA	0.0735998	0	1	0		0.446491
mmu-miR-6955-5p	AGGGCCTCAGGACTCAGGAGGTGA	0.294399	0.791075	4	12	0.372151	0.0813888
mmu-miR-6956-3p	TGACCGGCCTATCCTCTCAG	0.956798	0.791075	13	12	1.20949	0.631953
mmu-miR-6956-5p	TGAGTGGGTGGGACTGGCCT	0	0	0	0		0.944977
mmu-miR-6957-3p	TGGATCTCTTGTTTTCTCTTCC	1.0304	1.05477	14	16	0.976897	0.96056
mmu-miR-6957-5p	CAGAAGAGAGACAGGATCTAG	0.1472	0	2	0		0.210962
mmu-miR-6958-3p	TCAGCTGCCTCTTGCCATCACAG	0.220799	0.263692	3	4		0.849858
mmu-miR-6958-5p	GTGGGAGAAGAGGCTGCTGTGG	0	0	0	0		0.944977
mmu-miR-6959-3p	CTGCACCGACCTGCTCTCCCAG	0	0.0659229	0	1		0.556537
mmu-miR-6959-5p	TGGGAAACCTGTGTCGGGCTGTG	0.367999	0.197769	5	3		0.405638
mmu-miR-696	GCGTGTGCTTGCTGTGGG	0	0.197769	0	3		0.154866
mmu-miR-6960-3p	AGCCAACCACCTCTCTCCTCAG	0	0	0	0		0.944977
mmu-miR-6960-5p	CAGGATGAGAAGAGTTTGGCTG	0.515199	0.791075	7	12	0.651264	0.383688
mmu-miR-6961-3p	TCCTCTTTCTTCCTGGCTCTAG	0.1472	0.329614	2	5		0.367298
mmu-miR-6961-5p	TGACTGGGAAGGAAATGGCC	0	0.0659229	0	1		0.556537
mmu-miR-6962-3p	TATCTGCCCTTCCCTGTCCTAT	0	0	0	0		0.944977
mmu-miR-6962-5p	AAGGACCTGGTGGGAGATCT	0.0735998	0.197769	1	3		0.447557
mmu-miR-6963-3p	TGCCTCTTGCCTCCATCCCACAG	0.0735998	0	1	0		0.446491
mmu-miR-6963-5p	GGTGGGATGGATGGCAGAACCTGG	0	0	0	0		0.944977
mmu-miR-6964-3p	TTTCTTGTCTTCCACTCTAG	1.6192	0.593306	22	9	2.72911	0.00840683
mmu-miR-6964-5p	TTGGGGTGTGAGACTGGAAAC	0	0	0	0		0.944977
mmu-miR-6965-3p	TCTGTGCTCGGTCTCGCTCCAG	0.515199	0.131846	7	2		0.0756975
mmu-miR-6965-5p	AGAGGGAGGCTATTGGGCAGGAGA	0	0	0	0		0.944977
mmu-miR-6966-3p	TGCTGTGTGCTTCCTCTGCAG	0.515199	0.988843	7	15	0.521012	0.157002
mmu-miR-6966-5p	CTCGGGGATGTGGACAGCACA	0.0735998	0.197769	1	3		0.447557
mmu-miR-6967-3p	TCATCTTTATCTCTCCCCAG	2.13439	1.91176	29	29	1.11645	0.671015
mmu-miR-6967-5p	CAGGGAGGGATAAAGACCAGT	0.294399	0.263692	4	4		0.865137
mmu-miR-6968-3p	ACAAGCGCTGTCTCCCCTCCAG	2.87039	2.04361	39	31	1.40457	0.157168
mmu-miR-6968-5p	AGGGGGCGAGGGGGCCCTGTGG	0	0	0	0		0.944977
mmu-miR-6969-3p	TGTTGTTCCCATCTCTGCAG	7.94878	0	108	0	49	6.45e-36
mmu-miR-6969-5p	CAGCAGAGTAGGGAGCAAAAGA	0	0	0	0		0.944977
mmu-miR-697	AACATCCTGGTCCTGTGGAGA	0	0	0	0		0.944977
mmu-miR-6970-3p	TCACGCCACCCACCCTGTGCT	0.0735998	0.197769	1	3		0.447557
mmu-miR-6970-5p	GTAAGTTCAGGGCTGGGAGCAGAGA	0.1472	0.197769	2	3		0.793289
mmu-miR-6971-3p	ACAGCCTCTGCTTCTTCTCAG	0	0.131846	0	2		0.293579
mmu-miR-6971-5p	TGGGGGAGGGTGTAGAGGCT	0	0	0	0		0.944977
mmu-miR-6972-3p	TTACTGTACCTGTCTCCATAG	0.0735998	0.46146	1	7		0.0573198
mmu-miR-6972-5p	GCTGGAGGCACAGGGCAGAACAG	0	0	0	0		0.944977
mmu-miR-6973a-3p	CACTCTAACCCTACCTACCCAT	0.294399	0	4	0		0.0470963
mmu-miR-6973a-5p	TACGGTGGGAGGGGTGGAGTTG	0	0	0	0		0.944977
mmu-miR-6973b-3p	TGCTCTCTTACCCTTCCTAG	0	0	0	0		0.944977
mmu-miR-6973b-5p	GTAGGTATGGGGAGAGGACAGGGA	0	0	0	0		0.944977
mmu-miR-6974-3p	TCTCCACTCTCTTCTGTCCCAG	0.220799	0	3	0		0.0996771
mmu-miR-6974-5p	GTGAGGCAGCAAGAGATTGGGGGT	0	0	0	0		0.944977
mmu-miR-6975-3p	TCTCTCCTTTCTCCTCCTAG	0	0	0	0		0.944977
mmu-miR-6975-5p	GCTGGGGAGAAAGGGGTTTGGCA	0	0	0	0		0.944977
mmu-miR-6976-3p	ATCTCCCTCCCAACTCCCCAG	0.0735998	0.131846	1	2		0.709718
mmu-miR-6976-5p	CAGGGAAGTTGAGAGGAAAATTG	0	0.0659229	0	1		0.556537
mmu-miR-6977-3p	AAGGCGTTGCCTGACCCTGACC	0	0.0659229	0	1		0.556537
mmu-miR-6977-5p	GTGAGGCGCTGTGGGCACGGCTTGG	0	0	0	0		0.944977
mmu-miR-6978-3p	ACGGCTTCACTCTCACCCTGCAG	0.809598	1.58215	11	24	0.511708	0.0632352
mmu-miR-6978-5p	AAGGGGTGAGAGAGAAGCTGGTG	0	0.0659229	0	1		0.556537
mmu-miR-6979-3p	TTGTGTCTGTCTGGCTCCCAG	2.20799	2.3073	30	35	0.95696	0.867936
mmu-miR-6979-5p	GGGGAGGCGCAGAGACTGAG	0	0	0	0		0.944977
mmu-miR-698-3p	CATTCTCGTTTCCTTCCCT	0	0	0	0		0.944977
mmu-miR-698-5p	TGTGGGTGGGACAGGGATGTT	0	0	0	0		0.944977
mmu-miR-6980-3p	TGACTTGCCTTCCACCCCAG	0.735998	0.527383	10	8	1.39557	0.483811
mmu-miR-6980-5p	GTGGGGGGGGAGGCTAGGTTAG	0	0	0	0		0.944977
mmu-miR-6981-3p	CAACAGCCTACTGTCTCCTCAG	0.0735998	0.263692	1	4		0.274691
mmu-miR-6981-5p	GTGAGGAGAAGGAAGAGGCTGAAGGC	0.0735998	0	1	0		0.446491
mmu-miR-6982-3p	TGGCCCCTCTGCCCCTTCCAG	0	0	0	0		0.944977
mmu-miR-6982-5p	CTGGAGGATCGCAGGGGTGGCCTGG	0	0	0	0		0.944977
mmu-miR-6983-3p	TGAATCAAAGTCTGTTGTTCCAG	0.294399	0.263692	4	4		0.865137
mmu-miR-6983-5p	TTGGAAGGGCATACTGATTCGG	0	0	0	0		0.944977
mmu-miR-6984-3p	TACTTTCTTTCCTGTCTTTCT	0	0	0	0		0.944977
mmu-miR-6984-5p	ACTGAAAGGCAATGAAGGAGGAGC	0.0735998	0	1	0		0.446491
mmu-miR-6985-3p	CTCACAGCCACCTCCTCACAG	0.0735998	0	1	0		0.446491
mmu-miR-6985-5p	TACTGAGGGGTGGCTGCTATGT	0	0	0	0		0.944977
mmu-miR-6986-3p	GTTTTCACCTTCCTCCCAG	0	0	0	0		0.944977
mmu-miR-6986-5p	AGGGGAGCTAGGTAGAAAGCCA	0.1472	0.0659229	2	1		0.544816
mmu-miR-6987-3p	CACCCATTTCTCCCTGCTTCCAG	0	0	0	0		0.944977
mmu-miR-6987-5p	TGGGACAGGGTGACAGGGTGAG	0	0	0	0		0.944977
mmu-miR-6988-3p	TGACCTCTGTATCTCCTGCCAG	4.85759	3.7576	66	57	1.29274	0.154918
mmu-miR-6988-5p	GGGGTGGAGAGCTGAGGCCCA	0	0	0	0		0.944977
mmu-miR-6989-3p	TGTCCACTGTCTCTGGTCCCAG	3.75359	2.57099	51	39	1.45998	0.0742801
mmu-miR-6989-5p	TTGGGGACAGAGGCACAGGATG	0	0	0	0		0.944977
mmu-miR-6990-3p	AGCCCTGCCTCTTCCTGGCAG	0	0	0	0		0.944977
mmu-miR-6990-5p	CCCAGGGTGAGTCAGGGCTCT	0.1472	0.395537	2	6		0.24002
mmu-miR-6991-3p	GCAGCCCTTTGTTCTTCTCCAG	0	0.0659229	0	1		0.556537
mmu-miR-6991-5p	TGGAGAACAGGGACTGGGCCTG	0.0735998	0	1	0		0.446491
mmu-miR-6992-3p	TCTCACTGATGATCATTTGCAG	0	0	0	0		0.944977
mmu-miR-6992-5p	TGCCTGTGATGGTTTGGCTGAGT	0.515199	0.263692	7	4		0.290144
mmu-miR-6993-3p	CTTGCGTTTGTTTCCTCACAG	0	0	0	0		0.944977
mmu-miR-6993-5p	AGTGGGAGAAACGGGTGTCTGTC	0	0	0	0		0.944977
mmu-miR-6994-3p	AACGATCTTCTCCGTCTTTGC	0.367999	0.593306	5	9		0.413738
mmu-miR-6994-5p	ACAAAGGTGGGTGAAGCCGGTGA	0.0735998	0	1	0		0.446491
mmu-miR-6995-3p	TGTGTCCCCTTCCTCTCACAG	0.0735998	0.131846	1	2		0.709718
mmu-miR-6995-5p	CTGGGAGTAGAAGGGGGAAACCA	0	0	0	0		0.944977
mmu-miR-6996-3p	CGGTGTCTCTGGTCACTCTGCAG	0.515199	0.46146	7	7		0.828328
mmu-miR-6996-5p	TGCACAGGACAGAGCACAGTC	0	0.0659229	0	1		0.556537
mmu-miR-6997-3p	TCAAACCTTACCCTCCTGTTTCC	0	0	0	0		0.944977
mmu-miR-6997-5p	TAACAGGCTGGAGAGGTGCAGA	0.220799	0	3	0		0.0996771
mmu-miR-6998-3p	AGAGCTGCTCTGTGCCCACACA	0.0735998	0	1	0		0.446491
mmu-miR-6998-5p	CTGGGCAGAGGGCAAAGTGACT	0	0	0	0		0.944977
mmu-miR-6999-3p	CTTCAGCTGTCCTCCTTTCTGT	0	0	0	0		0.944977
mmu-miR-6999-5p	AAGGAAGGAGAGTCAGCAAGCAC	0	0	0	0		0.944977
mmu-miR-700-3p	CACGCGGGAACCGAGTCCACC	18.1792	6.46044	247	98	2.81392	5.61e-20
mmu-miR-700-5p	TAAGGCTCCTTCCTGTGCTTGC	13.1008	7.64705	178	116	1.71318	4.97e-06
mmu-miR-7000-3p	CACCCACCTGCCTGTCCTCCAG	0	0	0	0		0.944977
mmu-miR-7000-5p	AGGGGACAGGTATCTGGACAGA	0	0	0	0		0.944977
mmu-miR-7001-3p	CGCTCACACTCCCTCTGCAG	0	0	0	0		0.944977
mmu-miR-7001-5p	AGGCAGGGTGTGAGCGTGAGCAT	0	0	0	0		0.944977
mmu-miR-7002-3p	TTGTGCTTCCCCTTGCCAG	0	0	0	0		0.944977
mmu-miR-7002-5p	TTGGCTTCGGGGAGTACGTGG	0	0	0	0		0.944977
mmu-miR-7003-3p	CCCCGGGTTTTCCCCACAG	0	0	0	0		0.944977
mmu-miR-7003-5p	TGTGGGGAGAAGCTGCGGCAG	0	0	0	0		0.944977
mmu-miR-7004-3p	CCCACTCCCTCCTTCACGCAG	0.0735998	0	1	0		0.446491
mmu-miR-7004-5p	TTCCGTGGATGAGGCCTGTGCCGT	0	0	0	0		0.944977
mmu-miR-7005-3p	CTGTGCCTGCTACCCATCCCTTGCA	0	0	0	0		0.944977
mmu-miR-7005-5p	CCTGGGGATGGGAGGACCAGCA	0	0	0	0		0.944977
mmu-miR-7006-3p	TTTCTGACCTGGATCCCCAG	0.1472	0	2	0		0.210962
mmu-miR-7006-5p	TGGGGGTGTTCAAGACTTGGGAACC	0	0	0	0		0.944977
mmu-miR-7007-3p	CCCATCCACGTTTCTTCT	0	0	0	0		0.944977
mmu-miR-7007-5p	TCAGAAGAGGCAGTGGAGGAGAT	0.367999	0.0659229	5	1		0.092683
mmu-miR-7008-3p	TGTGCTTCTTGCCTCTTCTCAG	0.220799	0.0659229	3	1		0.31
mmu-miR-7008-5p	TGTGGGAGATGCCAGGAGCCGTAC	0	0.131846	0	2		0.293579
mmu-miR-7009-3p	TCTTTTCCCCTCTCCCTGCAG	0	0.0659229	0	1		0.556537
mmu-miR-7009-5p	TTGGGGTCAGGGGACCAGAGCT	0	0	0	0		0.944977
mmu-miR-701-3p	TATCTATTAAAGAGGCTAGC	0.1472	0.197769	2	3		0.793289
mmu-miR-701-5p	TTAGCCGCTGAAATAGATGGA	0.1472	0.527383	2	8		0.0967752
mmu-miR-7010-3p	AGGTTCTCCTTTCCTTTGCAG	0	0	0	0		0.944977
mmu-miR-7010-5p	CGGAAAGGATTGGGAAACTTGA	0	0	0	0		0.944977
mmu-miR-7011-3p	TCTGCTTCCCTCCTCCTCTAG	0	0.131846	0	2		0.293579
mmu-miR-7011-5p	AGGAGGATGGGAGAGGGAGGTGT	0	0	0	0		0.944977
mmu-miR-7012-3p	TGACCTGTGGCTCCTCTCCCAG	0.1472	0.0659229	2	1		0.544816
mmu-miR-7012-5p	AAGGAGAGGAGTTGGCAGGGACT	0.1472	0.329614	2	5		0.367298
mmu-miR-7013-3p	CCACACTTACTGTTGCCTCTTCCT	0.220799	0.46146	3	7		0.305485
mmu-miR-7013-5p	TATGAAGAGGCCAGTGTTGTAG	0.0735998	0.0659229	1	1		0.917549
mmu-miR-7014-3p	CCTCTTTCATACCAACCACAG	0	0	0	0		0.944977
mmu-miR-7014-5p	TTGGGTGCTGTGGAAGGGACAG	0	0.197769	0	3		0.154866
mmu-miR-7015-3p	TCTCACTGTCCTCTGCACTAG	16.0448	12.6572	218	192	1.26764	0.0164124
mmu-miR-7015-5p	TCTGTGCAGTAGGCTGTGGGTTC	0	0.197769	0	3		0.154866
mmu-miR-7016-3p	ACCTGCCTCCTGCTCTCCCCAG	0	0	0	0		0.944977
mmu-miR-7016-5p	CAGGGAGGGGAGCGAGAGTAG	0	0.0659229	0	1		0.556537
mmu-miR-7017-3p	ACCCTGCTCCTCTCCCTCCAG	0.0735998	0	1	0		0.446491
mmu-miR-7017-5p	AGAGGGTTGTGAGACTAGGGCTGT	0.1472	0.329614	2	5		0.367298
mmu-miR-7018-3p	TCACCCTGCTGCCGGCTTGCAG	0	0	0	0		0.944977
mmu-miR-7018-5p	GTGAGCAGACAGGGAGTGGTGGGG	0	0	0	0		0.944977
mmu-miR-7019-3p	TCACCTTGGCCGCCTCTCTGCAG	0	0	0	0		0.944977
mmu-miR-7019-5p	ATCTGGGAGGGGCTGTCAGGAGT	0	0	0	0		0.944977
mmu-miR-702-3p	TGCCCACCCTTTACCCCGCTCC	0.441599	0.988843	6	15	0.446581	0.0925385
mmu-miR-702-5p	GTGAGTGGGGTGGTTGGCATG	0.0735998	0.593306	1	9		0.0191036
mmu-miR-7020-3p	AACCCCTCTCTTCTCTCCCAG	0.1472	0.0659229	2	1		0.544816
mmu-miR-7020-5p	TGGGATGGTGGAGAGGGTGACCAG	0	0	0	0		0.944977
mmu-miR-7021-3p	TCTCTGTGCTTCTGCTCCTTAG	0.441599	0	6	0		0.010514
mmu-miR-7021-5p	ATAGGAGTTGATTACAGAGCAA	0.662398	0.856997	9	13	0.772929	0.570815
mmu-miR-7022-3p	ACAAGCCTGACCTCTGCCCCCA	0	0	0	0		0.944977
mmu-miR-7022-5p	CCTGGCAAGGAAGGGCTCTGTTT	0.367999	0.131846	5	2		0.222718
mmu-miR-7023-3p	TCACCCTGTCTGCGCCCCTCAG	0.220799	0.131846	3	2		0.58737
mmu-miR-7023-5p	ATGGGGGAGCTGGGATTGGGCGT	0	0	0	0		0.944977
mmu-miR-7024-3p	CCAGCAGTCCCTGCTCCCTACAG	0.0735998	0	1	0		0.446491
mmu-miR-7024-5p	TTGGGGGATGGGTTGCTTGGC	0	0	0	0		0.944977
mmu-miR-7025-3p	CAGCACAACTCCAGCTCACCAG	0.294399	0.0659229	4	1		0.171315
mmu-miR-7025-5p	CGTGAGCTGAAGCTGGTGGCTCCC	0	0	0	0		0.944977
mmu-miR-7026-3p	TGTGCTTTCTGGTCTTGGCTTAG	0	0.0659229	0	1		0.556537
mmu-miR-7026-5p	TTCTGAGACCATGGGGTATAT	0.294399	0.329614	4	5		0.892472
mmu-miR-7027-3p	TCGGGTTTCTCTCCTCTTCCAG	0	0.131846	0	2		0.293579
mmu-miR-7027-5p	TGGAAAGGAAGAAACAGCAGAGC	0	0	0	0		0.944977
mmu-miR-7028-3p	CCTTCTCTTCCCCCTCGGCCAG	0	0	0	0		0.944977
mmu-miR-7028-5p	TGGGCTGAGGCTTGGGTCAGGAG	0	0	0	0		0.944977
mmu-miR-7029-3p	TGTGGCTCTGTGTGTCCAGATC	0.0735998	0.131846	1	2		0.709718
mmu-miR-7029-5p	TCTGGACGCTCGGCTGCCAGCGC	0	0	0	0		0.944977
mmu-miR-703	AAAACCTTCAGAAGGAAAGAA	0	0	0	0		0.944977
mmu-miR-7030-3p	CTTGCTCTGTTATCTCTCCAG	0.441599	0.263692	6	4		0.431868
mmu-miR-7030-5p	TGGGGAGGTGGCTGTGCTAGTC	0.0735998	0	1	0		0.446491
mmu-miR-7031-3p	AACCCTCTTGCCCTCTCCTAG	0	0.197769	0	3		0.154866
mmu-miR-7031-5p	CCTGAGAGGCCTGAAGGGTGGGA	0.220799	0.197769	3	3		0.880001
mmu-miR-7032-3p	ATCCTCTCGGTACCGCCCTGCA	0	0	0	0		0.944977
mmu-miR-7032-5p	CCCAGGGTGGTCCCCGAGAGGGTGGT	0.0735998	0	1	0		0.446491
mmu-miR-7033-3p	TGCCTCCATTCTCTTGGGCAG	0	0	0	0		0.944977
mmu-miR-7033-5p	TCTCCAGGAGTCTGAGGGGCAGG	0.367999	0.856997	5	13	0.429405	0.106069
mmu-miR-7034-3p	TTGGCCTTCCTTCCCTACCCTACA	0	0	0	0		0.944977
mmu-miR-7034-5p	TCCGGGAGGGATGGATGTGCT	0	0	0	0		0.944977
mmu-miR-7035-3p	TCTGAGCCGCTGTCCCTGCAG	0.515199	0.725152	7	11	0.71047	0.499905
mmu-miR-7035-5p	GGCTGGGAGAGTGGCTCAGAA	0.0735998	0	1	0		0.446491
mmu-miR-7036a-3p	CCGTCCTCATCCGCTCCTCCCAG	0	0	0	0		0.944977
mmu-miR-7036a-5p	AGCGGGGTTCGGTGGGGAAGAGA	0.0735998	0	1	0		0.446491
mmu-miR-7036b-3p	TTCCTGGTGGGCCTCGGGGTCC	0	0.0659229	0	1		0.556537
mmu-miR-7036b-5p	ACGCGGGGTTCTCTGTGGAAGC	0.367999	0.395537	5	6		0.926681
mmu-miR-7037-3p	TGTCTCCTAATGTCACCTGCAG	0	0	0	0		0.944977
mmu-miR-7037-5p	AAGGTGGCCACAGGAGATCATGGT	0.0735998	0	1	0		0.446491
mmu-miR-7038-3p	CACTGCTCCTGCCTTCTTACAG	0	0	0	0		0.944977
mmu-miR-7038-5p	TGTAGAAGGAAGGGCTGCTGTG	0.1472	0.0659229	2	1		0.544816
mmu-miR-7039-3p	CCTGTTCTGCCCTCCCTTCCAG	0	0	0	0		0.944977
mmu-miR-7039-5p	AGAGGGATGGAGAGCATCGCGT	0	0	0	0		0.944977
mmu-miR-704	AGACATGTGCTCTGCTCCTAG	7.80158	15.6237	106	237	0.499342	8.04e-10
mmu-miR-7040-3p	CGCCACCCTCTCTCTCACGTAG	0	0	0	0		0.944977
mmu-miR-7040-5p	CATACGGAGGGAGATGGAGGCG	0	0	0	0		0.944977
mmu-miR-7041-3p	TGGTTCTCTTCTTCCCTCAG	0	0	0	0		0.944977
mmu-miR-7041-5p	AGAGGGAATGGAGACTCAGTTGA	0	0	0	0		0.944977
mmu-miR-7042-3p	TGTCCCTTTGTTTTCTCTCAG	0.515199	0	7	0		0.00496776
mmu-miR-7042-5p	TAGAGACAGCAGAAGGGCCAC	0.0735998	0.131846	1	2		0.709718
mmu-miR-7043-3p	ACTGTGCCTCTCTGTTTTCAG	22.1535	34.4117	301	522	0.643779	6.57e-10
mmu-miR-7043-5p	TGTGAAAGCAGAGAGGCATTTTT	0.0735998	0.197769	1	3		0.447557
mmu-miR-7044-3p	ATGCAGCCCCGACCCTCACAG	0	0	0	0		0.944977
mmu-miR-7044-5p	GTGTGGTGGTGGTGGCGGC	0	0	0	0		0.944977
mmu-miR-7045-3p	TCTCCCCCCTCCCCCGCACAG	0.0735998	0	1	0		0.446491
mmu-miR-7045-5p	AGCGGGTGGGGGAGGGGGACT	0	0	0	0		0.944977
mmu-miR-7046-3p	TGAACCACCCATCCCCCTACAG	0	0	0	0		0.944977
mmu-miR-7046-5p	TGTAGGGTGAGGCTGGGAGCCAGG	0.0735998	0	1	0		0.446491
mmu-miR-7047-3p	TCACCCTCACCCTTCCTCCTTCC	0	0	0	0		0.944977
mmu-miR-7047-5p	TGAGGGAGGAGGGCTGGGTCTGA	0	0.0659229	0	1		0.556537
mmu-miR-7048-3p	TCTTCCATTCTCTTTCCCCAG	0.883198	0.856997	12	13	1.03057	0.929934
mmu-miR-7048-5p	CGGGGCTGAGAGGTGAGGAAGC	0.0735998	0	1	0		0.446491
mmu-miR-7049-3p	TGCAGCCCCTGTCTGCCTCAG	0	0	0	0		0.944977
mmu-miR-7049-5p	TCTGAAGGCAGTCAGGTAGGCGG	0.0735998	0.0659229	1	1		0.917549
mmu-miR-705	GGTGGGAGGTGGGGTGGGCA	0	0	0	0		0.944977
mmu-miR-7050-3p	TCTCAGCCTTTATCTCCCCAG	0.0735998	0	1	0		0.446491
mmu-miR-7050-5p	ACAGGAGAAGGGGGTGAGAGA	0.0735998	0	1	0		0.446491
mmu-miR-7051-3p	TGAGCCACTGATTCCTGTGTGC	0.0735998	0	1	0		0.446491
mmu-miR-7051-5p	TCACCAGGAGGAAGTTGGGTCA	0	0	0	0		0.944977
mmu-miR-7052-3p	GCTCTGCCCCCTCCTTCCCAG	0.294399	0.0659229	4	1		0.171315
mmu-miR-7052-5p	TGTGGGAAGGTGGAGGCCTTT	0	0	0	0		0.944977
mmu-miR-7053-3p	CTCCTGTGTCTCCTTCCCCAG	0	0.395537	0	6		0.0227328
mmu-miR-7053-5p	TGGGGAAAGGCAGGCTACTGG	0	0	0	0		0.944977
mmu-miR-7054-3p	TCCAACTTGGCCCCTTCCAG	0.588798	0.131846	8	2		0.0428828
mmu-miR-7054-5p	TAGGAAGGTGGTTGGGCTGAGTACT	0.220799	0.329614	3	5		0.621853
mmu-miR-7055-3p	TTGCTACTTTGATACCCCACCAG	0	0	0	0		0.944977
mmu-miR-7055-5p	TCAGTGGGTTATCTGAGTTGG	0	0	0	0		0.944977
mmu-miR-7056-3p	CCTCACCTGTCTCCCACCACAG	0	0	0	0		0.944977
mmu-miR-7056-5p	TGTGGAGGAGGACAGAGAGGTT	0	0	0	0		0.944977
mmu-miR-7057-3p	TAATTTGATGTCTTTCTCCACC	0.662398	0.0659229	9	1		0.00695929
mmu-miR-7057-5p	CAGGAGAGGACTCAAGTT	0.0735998	0	1	0		0.446491
mmu-miR-7058-3p	CTCGTTCCTTCCTTTCTTCCAG	0.0735998	0	1	0		0.446491
mmu-miR-7058-5p	TAGAGGGGAGGTGACCGTGGAAGT	0.294399	0.131846	4	2		0.367896
mmu-miR-7059-3p	TGTTTGCTGTTTGTCCTCCCAG	0.220799	0.197769	3	3		0.880001
mmu-miR-7059-5p	ACCGGGGACTGCGGCTTTCAGT	0.515199	0.856997	7	13	0.601167	0.289372
mmu-miR-706	AGAGAAACCCTGTCTCAAAAAA	0.0735998	0.0659229	1	1		0.917549
mmu-miR-7060-3p	TCTACTCTACCTTCTACTCAG	0.0735998	0	1	0		0.446491
mmu-miR-7060-5p	GTGAGTGCTGGGTAGAATGGGA	0	0	0	0		0.944977
mmu-miR-7061-3p	TATCCCTTTTATTTCCTTTTAG	0	0	0	0		0.944977
mmu-miR-7061-5p	TATGGAAATAGGAGGTGATTTT	0.1472	0.0659229	2	1		0.544816
mmu-miR-7062-3p	ACTAACTTCTCCTGGCCCCACAG	0	0	0	0		0.944977
mmu-miR-7062-5p	TGGAGGCCAGCTTGTGGAGTGTCT	0.1472	0.197769	2	3		0.793289
mmu-miR-7063-3p	TGCTCTCTGCCCCTCTTAAG	0	0.131846	0	2		0.293579
mmu-miR-7063-5p	ATGAGAGGTGCAGGCTGAGCACA	0.1472	0.131846	2	2		0.89704
mmu-miR-7064-3p	CAGGGCCCTTTATGTCTCTCT	0	0	0	0		0.944977
mmu-miR-7064-5p	TCAGAGGCATAAAGGTCATTTGCT	0.0735998	0	1	0		0.446491
mmu-miR-7065-3p	TTGGTTTTCCTGTTTGCACAG	1.104	0.92292	15	14	1.1962	0.626823
mmu-miR-7065-5p	AGTGTAGCAGGTAAACCAGGA	0	0	0	0		0.944977
mmu-miR-7066-3p	TCTACCCATTGCCTGCCTCCCAG	0	0	0	0		0.944977
mmu-miR-7066-5p	TGGGTTGGGAAATGAGTAGAGG	0	0	0	0		0.944977
mmu-miR-7067-3p	TGATTGCTTCCCTCCCCACAG	0.220799	0	3	0		0.0996771
mmu-miR-7067-5p	TGCAGGGGGTGGTTGCACACGGA	0	0	0	0		0.944977
mmu-miR-7068-3p	TCACCCTGGACTGACTCTCAG	1.9136	3.23022	26	49	0.592404	0.0293403
mmu-miR-7068-5p	GTGAGGCTCAGTATGGGGTGG	0	0	0	0		0.944977
mmu-miR-7069-3p	CCTGCCCTGCCAACCCCTACA	0	0	0	0		0.944977
mmu-miR-7069-5p	TTGGGGGCCTGGGAGGGTGACAC	0	0.0659229	0	1		0.556537
mmu-miR-707	CAGTCATGCCGCTTGCCTACG	0	0	0	0		0.944977
mmu-miR-7070-3p	CAGGCTCTCCTTCCCTCCAG	0	0	0	0		0.944977
mmu-miR-7070-5p	GTGAGGGGAGCTGAGGCAGGA	0	0	0	0		0.944977
mmu-miR-7071-3p	CTGACGTCTCGGTTCCCGCAG	0.0735998	0	1	0		0.446491
mmu-miR-7071-5p	CCCGGGAGCGAGGTGCTGCAGCG	0	0	0	0		0.944977
mmu-miR-7072-3p	CTAGCTTCTCTTCTTCCCCAG	0.220799	0.131846	3	2		0.58737
mmu-miR-7072-5p	GAGGGGAGACAAGAGGCAAGGC	0.1472	0	2	0		0.210962
mmu-miR-7073-3p	ATAGCCTTTTCCTCCCCAACAG	0	0	0	0		0.944977
mmu-miR-7073-5p	TGGGGGAATTGAAAGACTATGA	0.956798	1.12069	13	17	0.853758	0.682592
mmu-miR-7074-3p	TAGGCCTTCTCCTCTCCCTGCAG	0	0.131846	0	2		0.293579
mmu-miR-7074-5p	TGGGAAGAGGCTAGGGCTCCAGT	0	0	0	0		0.944977
mmu-miR-7075-3p	CAACCATGTCTTCTTTCCCAG	6.25598	3.23022	85	49	1.9367	0.000174609
mmu-miR-7075-5p	CGGGGAGGAGGACATGGTTTT	0	0	0	0		0.944977
mmu-miR-7076-3p	TGACTACCACTGTCTCCCCAG	0	0	0	0		0.944977
mmu-miR-7076-5p	AGGGGAGGTGGTATGGTCTCA	0	0	0	0		0.944977
mmu-miR-7077-3p	CCTTCCATGGCTCCTGGCAG	0	0	0	0		0.944977
mmu-miR-7077-5p	GGCCAAGGTCCCATGGCAGGC	0	0	0	0		0.944977
mmu-miR-7078-3p	TACTTTTTTTATCATCCACAG	0	0	0	0		0.944977
mmu-miR-7078-5p	TGTGGGTGGTAGGAGACGCT	0.220799	0.0659229	3	1		0.31
mmu-miR-7079-3p	TGACTTCTGTTCTCTTTCCAG	0	0	0	0		0.944977
mmu-miR-7079-5p	AGGGCTGAGGCAGTGAGTCCTG	0	0	0	0		0.944977
mmu-miR-708-3p	CAACTAGACTGTGAGCTTCTAG	168.912	92.3579	2295	1401	1.82888	2.58e-73
mmu-miR-708-5p	AAGGAGCTTACAATCTAGCTGGG	45.5583	16.283	619	247	2.79791	2.93e-47
mmu-miR-7080-3p	CAGGCTCACCCCTCCGTTCCCT	0	0	0	0		0.944977
mmu-miR-7080-5p	GTAGGAGCTGGAGGTGGGTTTGG	0	0	0	0		0.944977
mmu-miR-7081-3p	TTCCCCTGGTATCCTCCTCACA	0.367999	0.527383	5	8		0.554644
mmu-miR-7081-5p	AGAGGAGGGTGCTCGGCCGGGGATTA	0	0	0	0		0.944977
mmu-miR-7082-3p	GCCCCCCTTGCTGTCTGTCTCC	0	0	0	0		0.944977
mmu-miR-7082-5p	TACGGGCAGGAGGAGGGGAGG	0	0	0	0		0.944977
mmu-miR-7083-3p	TCTGCTCTCCTGGACCCCAG	0	0	0	0		0.944977
mmu-miR-7083-5p	TCGGGGCTGGACAAGCAGAGA	0.956798	0.593306	13	9	1.61265	0.271565
mmu-miR-7084-3p	GCCTCTGACCCCTGTCCTCTGC	0	0	0	0		0.944977
mmu-miR-7084-5p	TAGAGGATAGAGGTAGAGAGT	0.0735998	0.0659229	1	1		0.917549
mmu-miR-7085-3p	TAGCTGGCCTCTCCCCACCTTC	0.0735998	0	1	0		0.446491
mmu-miR-7085-5p	CAGTGGGGGCAGGCCAGCAGGA	0	0.0659229	0	1		0.556537
mmu-miR-7086-3p	TCCGTTCTGATATCTCCTCAG	0.588798	0.395537	8	6		0.464972
mmu-miR-7086-5p	AAGAGGAGAAAGGTTTGGGCA	0.0735998	0	1	0		0.446491
mmu-miR-7087-3p	TGCTGGCTCTCTCCCCTGCCAG	0	0	0	0		0.944977
mmu-miR-7087-5p	AGGCAGGTGTGGAGCTGGTCT	0	0.263692	0	4		0.0816938
mmu-miR-7088-3p	TTGACCTTCCTCCATTGCTTCC	0	0	0	0		0.944977
mmu-miR-7088-5p	GCAAGTGGTGGTGAGGAGGGGAAAC	0	0	0	0		0.944977
mmu-miR-7089-3p	TCAGTGTCTGCTGTCTCCACAG	0.1472	0.0659229	2	1		0.544816
mmu-miR-7089-5p	CCGTGGGACCTACAGACTCCTGGG	0.0735998	0	1	0		0.446491
mmu-miR-709	GGAGGCAGAGGCAGGAGGA	0.662398	0.329614	9	5		0.21184
mmu-miR-7090-3p	TTTGATGTCTGACTTTGCAG	0.1472	0.263692	2	4		0.548258
mmu-miR-7090-5p	TCTCAGAGTTGGGACACCATGAG	0	0	0	0		0.944977
mmu-miR-7091-3p	AGTGGCTTCTGTCGTCTCTAG	3.53279	3.88945	48	59	0.908301	0.627143
mmu-miR-7091-5p	GTAGGGGTGATAGATTCCATGGC	0.883198	0.46146	12	7	1.91392	0.171541
mmu-miR-7092-3p	TGTTCTTTGTTTTGTTTGCCTTAG	0	0	0	0		0.944977
mmu-miR-7092-5p	AAAGGCAAACTCACAGAATCATT	0	0	0	0		0.944977
mmu-miR-7093-3p	TTTCCATCTGTCATCCTGCAG	1.104	1.05477	15	16	1.04667	0.890592
mmu-miR-7093-5p	CAGGATGACAGAAGGAAAACCT	0	0	0	0		0.944977
mmu-miR-7094-1-5p	TCTGAAGAGGATACAGGGTCTGA	0.1472	0.131846	2	2		0.89704
mmu-miR-7094-3p	TACTCTGCTGTTCTCTCCACA	0	0	0	0		0.944977
mmu-miR-7094b-2-5p	TCTGGAGAGGATACAGGGTCTGA	0	0	0	0		0.944977
mmu-miR-710	CCAAGTCTTGGGGAGAGTTGAG	0	0	0	0		0.944977
mmu-miR-711	GGGACCCGGGGAGAGATGTAAG	0	0	0	0		0.944977
mmu-miR-7115-3p	ACTTGGTCCCCTGCCCCCACAG	0.0735998	0	1	0		0.446491
mmu-miR-7115-5p	TCGGGGGTTGTGGTGCCGAATTGT	0.662398	1.12069	9	17	0.591063	0.207732
mmu-miR-7116-3p	TTTTTTTCCTTTGCCTTCTCAG	0.0735998	0.131846	1	2		0.709718
mmu-miR-7116-5p	TGAAGACATCAGGAAAAAAAA	0	0	0	0		0.944977
mmu-miR-7117-3p	TGTCCTTCTCTTTCCCCCAG	0.1472	0.0659229	2	1		0.544816
mmu-miR-7117-5p	TCTGGGGGCTCAGCTGAGGATA	0	0	0	0		0.944977
mmu-miR-7118-3p	TAACTCTACGTCCTCCTCCACA	0.1472	0.0659229	2	1		0.544816
mmu-miR-7118-5p	TGGGGAAGGCGGGAGAGGGAAC	0	0	0	0		0.944977
mmu-miR-7119-3p	AAAAAACACCGTTTCCTCCAG	0	0	0	0		0.944977
mmu-miR-7119-5p	CTGGGGGATTGGGTGCCTTCT	0	0	0	0		0.944977
mmu-miR-712-3p	TGCGAGTCACCCCCGGGTGTTG	0	0	0	0		0.944977
mmu-miR-712-5p	CTCCTTCACCCGGGCGGTACC	0.1472	0.329614	2	5		0.367298
mmu-miR-713	TGCACTGAAGGCACACAGC	0	0	0	0		0.944977
mmu-miR-714	CGACGAGGGCCGGTCGGTCGC	0.0735998	0.197769	1	3		0.447557
mmu-miR-717	CTCAGACAGAGATACCTTCTCT	0	0	0	0		0.944977
mmu-miR-718	CTTCCGCCCGGCCGGGTGTCG	0	0	0	0		0.944977
mmu-miR-719	ATCTCGGCTACAGAAAAATGTT	0	0	0	0		0.944977
mmu-miR-721	CAGTGCAATTAAAAGGGGGAA	0	0	0	0		0.944977
mmu-miR-7210-3p	TTATATGTAAGTAACAATGTGGCT	0	0	0	0		0.944977
mmu-miR-7210-5p	TAACATTGTAGACAGGCACAAAG	0	0	0	0		0.944977
mmu-miR-7211-3p	TGGAGTGACTGTAGGGAGGATGC	0	0	0	0		0.944977
mmu-miR-7211-5p	TCTTTCCCTCTGCCACTCCACC	0	0	0	0		0.944977
mmu-miR-7212-3p	TAACACACACGTCTCCAGGTC	0	0.131846	0	2		0.293579
mmu-miR-7212-5p	TCTGGGGGCTTGTGTGGTAGG	0.220799	0.0659229	3	1		0.31
mmu-miR-7213-3p	TACCTCAAGAGAGCCAGTCT	0	0	0	0		0.944977
mmu-miR-7213-5p	ACTGGGTCTCTTGAGGTAGC	0	0	0	0		0.944977
mmu-miR-7214-3p	CTCAGTCCTGACCCCTTGAGCGCA	0	0	0	0		0.944977
mmu-miR-7214-5p	TGTTTTCTGGGTTGGAATGAGAA	0	0	0	0		0.944977
mmu-miR-7215-3p	TGCTCTGAGAGGCAGAAAAGCGG	0	0	0	0		0.944977
mmu-miR-7215-5p	GCTCTTTATGTCCAAGCTGAGCTAC	0	0	0	0		0.944977
mmu-miR-7216-3p	TGGAATTTGGTCTTTTCCGGC	0	0	0	0		0.944977
mmu-miR-7216-5p	TGGAGAGCTGGCAGAGGACCCAGA	0	0	0	0		0.944977
mmu-miR-7217-3p	TGAGAACCCACAAGCAAGAAGA	0	0	0	0		0.944977
mmu-miR-7217-5p	AACTTGTATCTTGTGAGACAGAAGG	0	0	0	0		0.944977
mmu-miR-7218-3p	CTAACCTGTCATTCTAGCCTGGGG	0	0	0	0		0.944977
mmu-miR-7218-5p	TGCAGGGTTTAGTGTAGAGGG	0	0	0	0		0.944977
mmu-miR-7219-3p	TATCCGGGTTTCTAACACACT	4.12159	2.04361	56	31	2.01682	0.00139339
mmu-miR-7219-5p	TGTGTTAGAGCTCAGGGTTGAGA	0.0735998	0.0659229	1	1		0.917549
mmu-miR-7220-3p	CCAGGAACAAGGTCTCAGTCCGA	0	0	0	0		0.944977
mmu-miR-7220-5p	GGTGAGCTCTTGGTACCTTGGC	0	0	0	0		0.944977
mmu-miR-7221-3p	TGACTGTGGGCTGGGGACTGG	0	0	0	0		0.944977
mmu-miR-7221-5p	CGTCTCTTGGTCACAGGTGGG	0	0	0	0		0.944977
mmu-miR-7222-3p	TCCAGGACAGTGGGCAGGAGCAG	0	0	0	0		0.944977
mmu-miR-7222-5p	GGCACTTGCCAGGCTCTGAGCTGGACT	0	0	0	0		0.944977
mmu-miR-7223-3p	GTCTCGAACAAGCTAGG	0	0	0	0		0.944977
mmu-miR-7223-5p	TAGCTTTGCTGAGGTGTCGG	0	0	0	0		0.944977
mmu-miR-7224-3p	TCCACTGAGAGGACCACCCAC	0.735998	1.05477	10	16	0.697783	0.385166
mmu-miR-7224-5p	GGGTAGGCCCCTCAGTGAAGA	0	0	0	0		0.944977
mmu-miR-7225-3p	CTTCTAGACAGCCTCTGCAGCA	0	0	0	0		0.944977
mmu-miR-7225-5p	ACGTAGACTGTGTAGAAGCC	0	0	0	0		0.944977
mmu-miR-7226-3p	TGACACAGCCATTCTCTGAGCAG	0.588798	0.0659229	8	1		0.0134908
mmu-miR-7226-5p	GCCAGGGAAGTTGATTGTGTGAAGGG	0	0	0	0		0.944977
mmu-miR-7227-3p	TCTGAAAAGGGTCATCGGCAGA	0	0.131846	0	2		0.293579
mmu-miR-7227-5p	TCTGATGACTTTTTCATTGA	0	0	0	0		0.944977
mmu-miR-7228-3p	AGTGTTCGGTCTCCAGT	0	0.0659229	0	1		0.556537
mmu-miR-7228-5p	TGGCGACCTGAACAGATGT	0.0735998	0.46146	1	7		0.0573198
mmu-miR-7229-3p	TACACAGACCAGTGACTTTCTGCA	0	0	0	0		0.944977
mmu-miR-7229-5p	TAGTAGACATCCCTGGATAGC	0	0	0	0		0.944977
mmu-miR-7230-3p	TTGAGTTGAGACTGTCAGTAGGT	0	0	0	0		0.944977
mmu-miR-7230-5p	AGACTGCTGTTTCTCTGAGTGGC	0	0	0	0		0.944977
mmu-miR-7231-3p	CTTGCTTCTTTGTTTCCCCAGAA	0	0	0	0		0.944977
mmu-miR-7231-5p	TTGGGGAACACTGGGGCATACC	0	0	0	0		0.944977
mmu-miR-7232-3p	TGGTTGAATTCGACTTTGGGGC	0	0	0	0		0.944977
mmu-miR-7232-5p	TACATGGATGATTGTTTTTCCAAG	0	0	0	0		0.944977
mmu-miR-7233-3p	TATTGTCTGCCTTTAGGTCTAC	0	0	0	0		0.944977
mmu-miR-7233-5p	AGTTAGGGACAGATAGATG	0	0	0	0		0.944977
mmu-miR-7234-3p	AAACGTCTTTCTAGGGTAGAAGG	0	0	0	0		0.944977
mmu-miR-7234-5p	TTGTTTTCTCCAAAGACGTTTCT	0	0	0	0		0.944977
mmu-miR-7235-3p	TCTGACTTCTTGCTTCTCTCCTC	0.220799	0.46146	3	7		0.305485
mmu-miR-7235-5p	GGAGGGAGGGGTCTGGGC	0	0	0	0		0.944977
mmu-miR-7236-3p	TTGGACCGCACAGATTTAGACC	0	0.263692	0	4		0.0816938
mmu-miR-7236-5p	CCTAAAACTGTGTGGTCCAATGCC	0	0	0	0		0.944977
mmu-miR-7237-3p	CATCCTGTTGAGCTTACCGAGC	0.220799	0.131846	3	2		0.58737
mmu-miR-7237-5p	ATGGTAGCTTGTGACAGGACTGGC	0.0735998	0	1	0		0.446491
mmu-miR-7238-3p	CTGTCCTTTGTGTTC	0	0	0	0		0.944977
mmu-miR-7238-5p	ATGCGGATGGGACGCGGC	0	0	0	0		0.944977
mmu-miR-7239-3p	TGGCTCTGTCAGGCAGGTAG	0	0	0	0		0.944977
mmu-miR-7239-5p	GCCATCCTGACAAAGCCCTT	0	0	0	0		0.944977
mmu-miR-7240-3p	CGCCGTTGGTCCTCTCCAACA	0	0	0	0		0.944977
mmu-miR-7240-5p	TTGGAGAGGACCGCCGTCGGA	0	0	0	0		0.944977
mmu-miR-7241-3p	TAGTAGATACTCATGGGAGAGC	0	0	0	0		0.944977
mmu-miR-7241-5p	ACTTGCATGAGTTAATACCCACC	0	0	0	0		0.944977
mmu-miR-7242-3p	TGGCAGCTCGGCTCTACTCTGG	0	0	0	0		0.944977
mmu-miR-7242-5p	ATTGGGCTTGGGAGGTGCTTGT	0	0	0	0		0.944977
mmu-miR-7243-3p	TCAGAACAGCTGACAGCAGT	0	0	0	0		0.944977
mmu-miR-7243-5p	TGCTGTCAGCTGTTCTGAGT	0	0	0	0		0.944977
mmu-miR-741-3p	TGAGAGATGCCATTCTATGTAGA	0	0	0	0		0.944977
mmu-miR-741-5p	TACGTAGATTGGTACCTATCATG	0	0	0	0		0.944977
mmu-miR-742-3p	GAAAGCCACCATGCTGGGTAAA	0	0	0	0		0.944977
mmu-miR-742-5p	TACTCACATGGTTGCTAATCA	0	0	0	0		0.944977
mmu-miR-743a-3p	GAAAGACACCAAGCTGAGTAGA	0	0	0	0		0.944977
mmu-miR-743a-5p	TATTCAGATTGGTGCCTGTCAT	0	0	0	0		0.944977
mmu-miR-743b-3p	GAAAGACATCATGCTGAATAGA	0	0	0	0		0.944977
mmu-miR-743b-5p	TGTTCAGACTGGTGTCCATCA	0	0	0	0		0.944977
mmu-miR-744-3p	CTGTTGCCACTAACCTCAACCT	4.12159	2.04361	56	31	2.01682	0.00139339
mmu-miR-744-5p	TGCGGGGCTAGGGCTAACAGCA	367.263	201.79	4990	3061	1.82003	5.04e-155
mmu-miR-7578	CATGGCTCTGTCTTCTGCCTCAGA	0	0	0	0		0.944977
mmu-miR-758-3p	TTTGTGACCTGGTCCACTA	0	0	0	0		0.944977
mmu-miR-758-5p	TGGTTGACCAGAGAGCACACG	0	0	0	0		0.944977
mmu-miR-759	GCAGAGTGCAAACAATTTTGAC	0	0	0	0		0.944977
mmu-miR-760-3p	CGGCTCTGGGTCTGTGGGGA	0	0.131846	0	2		0.293579
mmu-miR-760-5p	CCCCTCAGGCCACCAGAGCCCGG	0	0	0	0		0.944977
mmu-miR-761	GCAGCAGGGTGAAACTGACACA	0	0	0	0		0.944977
mmu-miR-762	GGGGCTGGGGCCGGGACAGAGC	0	0	0	0		0.944977
mmu-miR-763	CCAGCTGGGAAGAACCAGTGGC	0	0	0	0		0.944977
mmu-miR-764-3p	AGGAGGCCATAGTGGCAACTGT	0	0	0	0		0.944977
mmu-miR-764-5p	GGTGCTCACATGTCCTCCT	0	0	0	0		0.944977
mmu-miR-7646-3p	TCACTGGTCGCTCTCTTTCAC	0	0	0	0		0.944977
mmu-miR-7646-5p	ACAAGAGAACTGATCAGTGCTG	0.588798	0.856997	8	13	0.687048	0.419974
mmu-miR-7647-3p	AAGTCCAGGAGGTGGTAGTAC	0	0.131846	0	2		0.293579
mmu-miR-7647-5p	AACTACCACCTCCTGGCCTTTT	0.367999	0.197769	5	3		0.405638
mmu-miR-7648-3p	AGGGCTGGGCCCGGGACGCGG	0.220799	0.0659229	3	1		0.31
mmu-miR-7648-5p	CCGCGTTCCGGGCTCGGCGC	0	0.0659229	0	1		0.556537
mmu-miR-7649-3p	TCTCTCCAGCACTGCTTGTTTCT	0.662398	0.46146	9	7		0.475651
mmu-miR-7649-5p	TGACAGCAGTGCTGTAGACATG	0.809598	1.91176	11	29	0.423482	0.0122305
mmu-miR-7650-3p	GTTTTGATATATACAAGAAGGA	0	0	0	0		0.944977
mmu-miR-7650-5p	AATCCTCTTGCAACCCAGAACT	0.0735998	0.197769	1	3		0.447557
mmu-miR-7651-3p	TCAGTTTGGTTTTTTTCCCCTTGA	0	0.0659229	0	1		0.556537
mmu-miR-7651-5p	AAGTGGAAAGCCAGCCTGAGAT	0.1472	0	2	0		0.210962
mmu-miR-7652-3p	TCTGGCTTTCCTGTGGCTTCT	0.367999	0.329614	5	5		0.8518
mmu-miR-7652-5p	TAAGGGCACAGGGATTTCAGGC	0	0.197769	0	3		0.154866
mmu-miR-7653-3p	CCCCTACTGTTCCACCCCGCCT	0.0735998	0.0659229	1	1		0.917549
mmu-miR-7653-5p	TAAGGGGCGGACAGACAGACGG	0.294399	0.197769	4	3		0.60986
mmu-miR-7654-3p	CGAGCGGGAGCGCGCCTCGTCC	0	0	0	0		0.944977
mmu-miR-7654-5p	GGAGTCGCGCTCCCGCTCGCGC	0.0735998	0.0659229	1	1		0.917549
mmu-miR-7655-3p	TTTATGACGCTCCGTGGGCCTG	0.220799	0.395537	3	6		0.441441
mmu-miR-7655-5p	CGGCCCACGGAGCTCCTAAAGA	0	0	0	0		0.944977
mmu-miR-7656-3p	ACAGGCTGTCTGATCCCACGGT	0.1472	0.0659229	2	1		0.544816
mmu-miR-7656-5p	TGTGGGATCAGATAGCCTGTTA	0.1472	0.46146	2	7		0.153696
mmu-miR-7657-3p	TTCCTTGCTATTCCCAACTTGGT	0	0	0	0		0.944977
mmu-miR-7657-5p	AATAGTTGGATAGTTAGGTAA	0	0	0	0		0.944977
mmu-miR-7658-3p	ACCACCTTCCTCACCCACGCT	0.441599	0	6	0		0.010514
mmu-miR-7658-5p	TGTGGGCGTGGCGGTGCTGG	0.1472	0	2	0		0.210962
mmu-miR-7659-3p	AGGAGTCAGCTTGTCGGTTCATG	0	0	0	0		0.944977
mmu-miR-7659-5p	AGGAGCCGGCTCCAGATTCCTG	0.0735998	0.0659229	1	1		0.917549
mmu-miR-7660-3p	ATCTGTAAGTGATGGGCAAAGTA	0.0735998	0	1	0		0.446491
mmu-miR-7660-5p	TTTGCCCTGGCTTCAGATCTCG	0	0	0	0		0.944977
mmu-miR-7661-3p	TTGACTCCCAGTTTCTCTCTGC	1.3984	0.791075	19	12	1.76772	0.12065
mmu-miR-7661-5p	AAGAAAGAAACCTGGAGTTTAAAGT	0	0	0	0		0.944977
mmu-miR-7662-3p	TGGAGCCAGGCGGATCAGCCTTGC	0.0735998	0	1	0		0.446491
mmu-miR-7662-5p	AGGGCTGAGGCCTGGATCCAGC	0	0	0	0		0.944977
mmu-miR-7663-3p	AGTGTGGATCATAAGGAGCTCC	0.1472	0	2	0		0.210962
mmu-miR-7663-5p	GCTGCTTGGTGATCATCCACTGT	0	0	0	0		0.944977
mmu-miR-7664-3p	TCTCTTAGGCTGGGTTAACTAAT	0.1472	0.197769	2	3		0.793289
mmu-miR-7664-5p	CAGTTTACCTGTCTATGAGAT	0	0	0	0		0.944977
mmu-miR-7665-3p	AGCCAGGTCCCTGTCCCCTACA	0	0	0	0		0.944977
mmu-miR-7665-5p	AAGGGAAGGCAGGAGAAAGGCTG	0	0	0	0		0.944977
mmu-miR-7666-3p	GATGCAGCGCACGGGCGAG	0	0.0659229	0	1		0.556537
mmu-miR-7666-5p	GTAGCCCGGGCGGTGCTTCCCC	0	0	0	0		0.944977
mmu-miR-7667-3p	AGGGACTGCAGAGATGGCACTG	0.441599	0.725152	6	11	0.608974	0.344557
mmu-miR-7667-5p	GAGCCATCTCTCTAGCCCCTGA	0.367999	0.131846	5	2		0.222718
mmu-miR-7668-3p	CGGTGCAGGGGATTCAGAGGAG	0	0	0	0		0.944977
mmu-miR-7668-5p	CACTCTGAATAACCTGCTCTCTGT	0	0	0	0		0.944977
mmu-miR-7669-3p	GAGCTGGGTGTGGTGGCACATGC	0	0.0659229	0	1		0.556537
mmu-miR-7669-5p	AGTACCACCATACACAGCTTTTG	0.883198	0.395537	12	6	2.23291	0.104542
mmu-miR-767	TGCACCATGGTTGTCTGAGCA	0	0	0	0		0.944977
mmu-miR-7670-3p	TTCCCTTTCTGAATATCTGTAGA	0.662398	2.50507	9	38	0.264423	7.62e-05
mmu-miR-7670-5p	ATTCAGATGGGCAGATTGGGAA	0	0.0659229	0	1		0.556537
mmu-miR-7671-3p	AAGCGGGCAGGCGGAGAACCAC	0	0.131846	0	2		0.293579
mmu-miR-7671-5p	AGGCTCCGCTCTGGCTAGCTTCC	0.1472	0.395537	2	6		0.24002
mmu-miR-7672-3p	TCGGCTGCCAGGTTCATGTGG	0	0.329614	0	5		0.0430944
mmu-miR-7672-5p	CGGTGGACTTGACAGCGGGCGA	0.0735998	0	1	0		0.446491
mmu-miR-7673-3p	TTCCTTACCTCACCGTCAAAGGA	0	0	0	0		0.944977
mmu-miR-7673-5p	TTTGACTGAGAGGTAAGGAATG	0.220799	1.05477	3	16	0.209335	0.00551487
mmu-miR-7674-3p	TCCCATTCTCACCGCACCCAG	0.1472	0	2	0		0.210962
mmu-miR-7674-5p	TGAGGTGTGGGCAGCATGAGGACT	0.1472	0.0659229	2	1		0.544816
mmu-miR-7675-3p	TGTTTCATTTGTTCGTGACTC	0.588798	0.593306	8	9		0.998259
mmu-miR-7675-5p	CTTACGAAAGAATGAAGAGCAA	0	0	0	0		0.944977
mmu-miR-7676-3p	TCCGGTGCTCACTCTGCCCACA	4.78399	9.88843	65	150	0.483796	4.14e-07
mmu-miR-7676-5p	AGGGCAGTATGATGGCCTCTGAT	0.367999	0.197769	5	3		0.405638
mmu-miR-7677-3p	CCGGCTGTGTCCTCTCACCTAGG	0.367999	0.329614	5	5		0.8518
mmu-miR-7677-5p	AGTGGTGAGCAGAAAGCAGCCGCGG	0	0	0	0		0.944977
mmu-miR-7678-3p	TTTCCTTACTTTCTCTTGTAGC	0.515199	1.58215	7	24	0.325632	0.00560383
mmu-miR-7678-5p	TTACAAGGGCTGGATAGGAAT	0	0	0	0		0.944977
mmu-miR-7679-3p	CAGGATCCCAGGGTACCAACCAGC	0	0.197769	0	3		0.154866
mmu-miR-7679-5p	AGGCTGGCACCAGGATCCCT	0	0	0	0		0.944977
mmu-miR-7680-3p	ACTGCTTGTTCACTGGAATAGG	0	0.131846	0	2		0.293579
mmu-miR-7680-5p	ATTCCAGTGAACAAGCAGTT	0	0	0	0		0.944977
mmu-miR-7681-3p	AGAAAGGGCACTGACAGGATAG	0	0	0	0		0.944977
mmu-miR-7681-5p	ATCCTGTCCTTGCCCTCTCT	0	0	0	0		0.944977
mmu-miR-7682-3p	CCTGTGGGTTGGGTTGGCTTT	0	0	0	0		0.944977
mmu-miR-7682-5p	AGGCACGACTCTTGCCACAGAAAC	0	0	0	0		0.944977
mmu-miR-7683-3p	TGGAAAGGTGGAACACGGAAC	0	0.131846	0	2		0.293579
mmu-miR-7683-5p	TTCCGTGTTTCGTCTGACCACT	0.220799	0	3	0		0.0996771
mmu-miR-7684-3p	TGCTGACTGGGGCTGGCCTGTG	0	0	0	0		0.944977
mmu-miR-7684-5p	TCTGGGAAGCCTGGGCAGCAG	0	0	0	0		0.944977
mmu-miR-7685-3p	AGACTTGGCTTCCGGCTGGAG	0	0	0	0		0.944977
mmu-miR-7685-5p	ACCTTCCGGTTTCTTCAAGTCTCC	0.0735998	0	1	0		0.446491
mmu-miR-7686-3p	CTGCTCGGGGCACTGTAAGAGA	0	0	0	0		0.944977
mmu-miR-7686-5p	CCTTCCACTGGACCTGGGGCTGGGC	0	0	0	0		0.944977
mmu-miR-7687-3p	CCACTCAGTCGCCCCGCCACA	0.1472	0.131846	2	2		0.89704
mmu-miR-7687-5p	AGGCGGGGAACCTGAGGCGCAGGCT	0	0	0	0		0.944977
mmu-miR-7688-3p	TCTGGCTTATGCCTAGCTTTC	0	0	0	0		0.944977
mmu-miR-7688-5p	TAGCTGGGCATGATCTGATGAGC	0	0	0	0		0.944977
mmu-miR-7689-3p	TTAGAGCCAGACTGCCTGGGTTT	0.0735998	0.0659229	1	1		0.917549
mmu-miR-7689-5p	CCGAGGCAGCCTGGCTTAG	0	0	0	0		0.944977
mmu-miR-770-3p	CGTGGGCCTGACGTGGAGCTGG	0.294399	0.0659229	4	1		0.171315
mmu-miR-770-5p	AGCACCACGTGTCTGGGCCACG	0	0	0	0		0.944977
mmu-miR-7a-1-3p	CAACAAATCACAGTCTGCCATA	64.3262	38.6308	874	586	1.66515	4.5e-22
mmu-miR-7a-2-3p	CAACAAGTCCCAGTCTGCCACA	0	0	0	0		0.944977
mmu-miR-7a-5p	TGGAAGACTAGTGATTTTGTTGT	16121	20982	219036	318281	0.768326	0
mmu-miR-7b-3p	CAACAAGTCACAGCCAGCCTCA	0	0	0	0		0.944977
mmu-miR-7b-5p	TGGAAGACTTGTGATTTTGTTGT	17.0016	18.3925	231	279	0.924375	0.378476
mmu-miR-802-3p	ACGGAGAGTCTTTGTCACTCAG	0.294399	0	4	0		0.0470963
mmu-miR-802-5p	TCAGTAACAAAGATTCATCCTT	11.2608	0.0659229	153	1	170.817	1.18e-48
mmu-miR-804	TGTGAGTTGTTCCTCACCTGGA	0	0	0	0		0.944977
mmu-miR-8090	GAAGCGCAGTGGAGGTCTGT	0.220799	0.395537	3	6		0.441441
mmu-miR-8091	AGGAGTGAGTGGTAAGCTGGTG	0	0.263692	0	4		0.0816938
mmu-miR-8092	GCCATCTGGGACTCGCAGGCA	0	0	0	0		0.944977
mmu-miR-8093	TTGGGGAGCAGAGCATGAGTG	0	0	0	0		0.944977
mmu-miR-8094	AACTGAAGGACAACGAGAAGA	0.588798	0.527383	8	8		0.817782
mmu-miR-8095	AAAGGATTCTGCTGTCTGTCCC	0	0	0	0		0.944977
mmu-miR-8096	GGGCACGGTAGCTGAAGAGT	0.441599	0.0659229	6	1		0.0493379
mmu-miR-8097	AACAAGGAAAATGTCCGGGCTG	0.809598	1.97769	11	30	0.409366	0.00859725
mmu-miR-8098	GCTATGGTCGCTGGCTCCCAA	0	0	0	0		0.944977
mmu-miR-8099	CCAAGGCGTGGGAAAGGTTGT	0	0	0	0		0.944977
mmu-miR-8100	AGGAGGAAAGGGAGCAAGCAGGT	0.1472	0	2	0		0.210962
mmu-miR-8101	GGCGAGCGGAGCCGGAGGAGCC	0	0	0	0		0.944977
mmu-miR-8102	TCACGCGGGGGAACGAGGAAGA	0.0735998	0	1	0		0.446491
mmu-miR-8103	TCTCCTGTTCTCTGTTCTCCC	1.3984	2.83468	19	43	0.493317	0.00865101
mmu-miR-8104	CAGGATGAGGTGGAGTGCAGCG	0	0	0	0		0.944977
mmu-miR-8105	AGGCGACTGGCGAGACCCGAAG	0.220799	0.131846	3	2		0.58737
mmu-miR-8106	TGACTCTGTACATGGCATTTAT	0.735998	1.31846	10	20	0.558227	0.133321
mmu-miR-8107	TGGAAACTAGTGGCTGGGACA	0	0.131846	0	2		0.293579
mmu-miR-8108	TCTGGGGAGGAGCGTAGTTACA	0.0735998	0.263692	1	4		0.274691
mmu-miR-8109	GCGCCGCGTGCCGGCCGCGGG	0	0	0	0		0.944977
mmu-miR-8110	AAGCGTGGATTGGGGGGGGGG	0	0	0	0		0.944977
mmu-miR-8111	ACCGGGCATGGTAGTGTACAC	0.1472	0.131846	2	2		0.89704
mmu-miR-8112	TCTCCGCCACCTCCACCGCA	1.3984	1.38438	19	21	1.01012	0.965828
mmu-miR-8113	CAGGAGAGTCAGGGGCAAGTAG	0	0	0	0		0.944977
mmu-miR-8114	TCACCCATCTCCTCTCCGCCT	6.84478	6.39452	93	97	1.07041	0.636506
mmu-miR-8115	CCGCAATAGCAACAAGGGCTCT	0.883198	0.46146	12	7	1.91392	0.171541
mmu-miR-8116	AAGGATCCGGGGCTAGTTGGC	0.1472	0.0659229	2	1		0.544816
mmu-miR-8117	GCTCGTGTGGAACAGAAGGGG	0	0.263692	0	4		0.0816938
mmu-miR-8118	GACAAACATGACTATGCTGACA	0.588798	0.659229	8	10	0.893163	0.830373
mmu-miR-8119	GAGGAGAGGGAGCTAGGGTC	0	0	0	0		0.944977
mmu-miR-8120	TGTGCCTTGCAACTTCCGAGCC	0.588798	0.856997	8	13	0.687048	0.419974
mmu-miR-871-3p	TGACTGGCACCATTCTGGATAAT	0	0	0	0		0.944977
mmu-miR-871-5p	TATTCAGATTAGTGCCAGTCATG	0	0	0	0		0.944977
mmu-miR-872-3p	TGAACTATTGCAGTAGCCTCCT	18.9152	14.7667	257	224	1.28093	0.00667003
mmu-miR-872-5p	AAGGTTACTTGTTAGTTCAGG	160.006	130.395	2174	1978	1.22708	4.37e-11
mmu-miR-873a-3p	GAGACTGACAAGTTCCCGGGA	0.441599	0.0659229	6	1		0.0493379
mmu-miR-873a-5p	GCAGGAACTTGTGAGTCTCCT	0.367999	0.131846	5	2		0.222718
mmu-miR-873b	ACAAGTTCCTGCAAATGCACAC	0	0	0	0		0.944977
mmu-miR-874-3p	CTGCCCTGGCCCGAGGGACCGA	1.9136	0.791075	26	12	2.41898	0.00919327
mmu-miR-874-5p	CGGCCCCACGCACCAGGGTAAG	0.220799	0	3	0		0.0996771
mmu-miR-875-3p	CCTGAAAATACTGAGGCTATG	0.0735998	0	1	0		0.446491
mmu-miR-875-5p	TATACCTCAGTTTTATCAGGTG	0.0735998	0.0659229	1	1		0.917549
mmu-miR-876-3p	TAGTGGTTTACAAAGTAATTCA	0	0	0	0		0.944977
mmu-miR-876-5p	TGGATTTCTCTGTGAATCACTA	0	0	0	0		0.944977
mmu-miR-877-3p	TGTCCTCTTCTCCCTCCTCCCA	3.45919	9.42697	47	143	0.366946	2e-10
mmu-miR-877-5p	GTAGAGGAGATGGCGCAGGG	1.3984	1.4503	19	22	0.96421	0.917619
mmu-miR-878-3p	GCATGACACCACACTGGGTAGA	0	0	0	0		0.944977
mmu-miR-878-5p	TATCTAGTTGGATGTCAAGACA	0	0	0	0		0.944977
mmu-miR-879-3p	GCTTATGGCTTCAAGCTTTCGG	0.0735998	0	1	0		0.446491
mmu-miR-879-5p	AGAGGCTTATAGCTCTAAGCC	0.515199	0.791075	7	12	0.651264	0.383688
mmu-miR-880-3p	TACTCCATCCTCTCTGAGTAGA	0	0	0	0		0.944977
mmu-miR-880-5p	TACTCAGATTGATATGAGTCA	0	0	0	0		0.944977
mmu-miR-881-3p	AACTGTGTCTTTTCTGAATAGA	1.0304	0.131846	14	2	7.81517	0.00110482
mmu-miR-881-5p	CAGAGAGATAACAGTCACATCT	0	0	0	0		0.944977
mmu-miR-882	AGGAGAGAGTTAGCGCATTAGT	0	0	0	0		0.944977
mmu-miR-883a-3p	TAACTGCAACAGCTCTCAGTAT	0	0	0	0		0.944977
mmu-miR-883a-5p	TGCTGAGAGAAGTAGCAGTTAC	0	0	0	0		0.944977
mmu-miR-883b-3p	TAACTGCAACATCTCTCAGTAT	0	0	0	0		0.944977
mmu-miR-883b-5p	TACTGAGAATGGGTAGCAGTCA	0	0	0	0		0.944977
mmu-miR-9-3p	ATAAAGCTAGATAACCGAAAGT	0.588798	0.197769	8	3		0.0997329
mmu-miR-9-5p	TCTTTGGTTATCTAGCTGTATGA	30.7647	22.4797	418	341	1.36856	1.61e-05
mmu-miR-92a-1-5p	AGGTTGGGATTTGTCGCAATGCT	5.81438	2.83468	79	43	2.05116	0.000106202
mmu-miR-92a-2-5p	AGGTGGGGATTGGTGGCATTAC	0	0.131846	0	2		0.293579
mmu-miR-92a-3p	TATTGCACTTGTCCCGGCCTG	7587.04	6022.05	103085	91350	1.25987	0
mmu-miR-92b-3p	TATTGCACTCGTCCCGGCCTCC	9.12638	6.19675	124	94	1.47277	0.00444576
mmu-miR-92b-5p	AGGGACGGGACGTGGTGCAGTGTT	0.883198	0.395537	12	6	2.23291	0.104542
mmu-miR-93-3p	ACTGCTGAGCTAGCACTTCCCG	16.7808	9.55882	228	145	1.75553	7.83e-08
mmu-miR-93-5p	CAAAGTGCTGTTCGTGCAGGTAG	1893.06	1409.69	25721	21384	1.34289	6.44e-224
mmu-miR-935	CCCAGTTACCGCTTCCGCTACCGC	1.472	0.329614	20	5	4.46581	0.000967395
mmu-miR-96-3p	CAATCATGTGTAGTGCCAATAT	0	0	0	0		0.944977
mmu-miR-96-5p	TTTGGCACTAGCACATTTTTGCT	23.9935	11.3387	326	172	2.11607	3.04e-16
mmu-miR-9768-3p	ACTGCCTTCCTTTGTGTGGCCCAG	0	0	0	0		0.944977
mmu-miR-9768-5p	TGGCACTCGGAGGACGGCACTGT	0	0	0	0		0.944977
mmu-miR-9769-3p	TAGGGTCTGTTCTGTGTCCTCC	2.20799	2.37322	30	36	0.930378	0.778978
mmu-miR-9769-5p	AGGCACAGAATTAGGCCCGACC	0	0	0	0		0.944977
mmu-miR-98-3p	CTATACAACTTACTACTTTCCT	18.8416	11.6683	256	177	1.61476	7.52e-07
mmu-miR-98-5p	TGAGGTAGTAAGTTGTATTGTT	611.394	557.246	8307	8453	1.09717	1.96e-09
mmu-miR-99a-3p	CAAGCTCGTTTCTATGGGTCT	0	0	0	0		0.944977
mmu-miR-99a-5p	AACCCGTAGATCCGATCTTGTG	4848.46	2244.21	65876	34043	2.16043	0
mmu-miR-99b-3p	CAAGCTCGTGTCTGTGGGTCCG	71.4654	58.4736	971	887	1.22218	1.54e-05
mmu-miR-99b-5p	CACCCGTAGAACCGACCTTGCG	2687.79	1796.99	36519	27259	1.49572	0
